# Supplementary material
Source: MDPI journal article supplement (https://www.mdpi.com/2075-163X/13/11/1404)
Supplement: s1 [file s1]

Archive with 31 entries (31 files):
- Fig 1sA Photo of Obnazhennaya pipe.jpg
- Fig. s1B.  Photo of outcrop of Obnazhennaya pipe.jpg
- Fig. s1C. Photo of outcrop of Velikan  dyke.JPG
- Fig. s2-1. Photo of thin section. Obnajennaya pipe, sample 7-257. PK.jpg
- Fig. s2-2. Photo of thin section. Obnajennaya pipe, sample 7-243 (PPL). PK.jpg
- Fig. s2-3 Photo of thin section. Obnajennaya pipe, sample 7-325. CK.jpg
- Fig. s2.Photo of thin section. Obnajennaya pipe, sample 7-234 (plane polarized light, PPL)..jpg
- Fig. s3. CaO vs.  Cr2O3 for garnet macrocrysts from Obnazhennaya.jpg
- Fig. s4. Correlation diagrams for spinel.jpg
- Fig. s5. Correlation diagrams  for clinopyroxenes.jpg
- Fig. s6. Plots for groundmass phlogopite from Obnazhennaya kimberlite..jpg
- Fig. s7. Microphotoes of groundmass of kimberlite from Velikan dyke..pdf
- FIg. s8. Photo of thin section of sample  90-20 from Rudniy Dvor dyke.jpg
- Figure captions.pdf
- List of figure captions.pdf
- List of tables for article.pdf
- Pipe Obn 戙、ム猕獱瓲_徕キ獱 of outcrop.JPG
- Pipe Obn 敭猱 沌犪猹_徕.JPG
- pipe Obnazhennaya 2012.JPG
- pipe Obnazhennaya.JPG
- Table s1. Major- and trace-element compositions of Obnazhennaya kimberlite..xlsx
- Table s10.  Compositions of minerals from Velikan dyke.xlsx
- Table s11. Composition of Ol from Kuoika and Ary-Mastakh fields.xlsx
- Table s2. Representative EMPA analyses of zoned microcryst olivines from Obnazhennaya kimberlites.xlsx
- Table s3. Compositions of macrocryst garnets from Obnazhennaya kimberlites.xls
- Table s4. Compositions of Mg-ilmenite from Obnazhennaya.xls
- Table s5. Compositions of spinels from Obnazhennaya.xlsx
- Table s6. Compositions of Cpx from Obnazhennaya kimberlites.xlsx
- Table s7. Representative EMPA analyses of phlogopites from Obnazhennaya groundmass kimberlites.xlsx
- Table s8. Representative EMPA analyses of perovskite from Obnazhennaya groundmass kimberlites.xlsx
- Table s9. Compositions of calcite and dolomite from Obnazhennaya groundmass kimberlites.xlsx
