# Supplementary material
Source: MDPI journal article supplement (https://www.mdpi.com/2075-163X/13/11/1404)
Supplement: s1 [file s1 › Fig. s7. Microphotoes of groundmass of kimberlite from Velikan dyke..pdf]

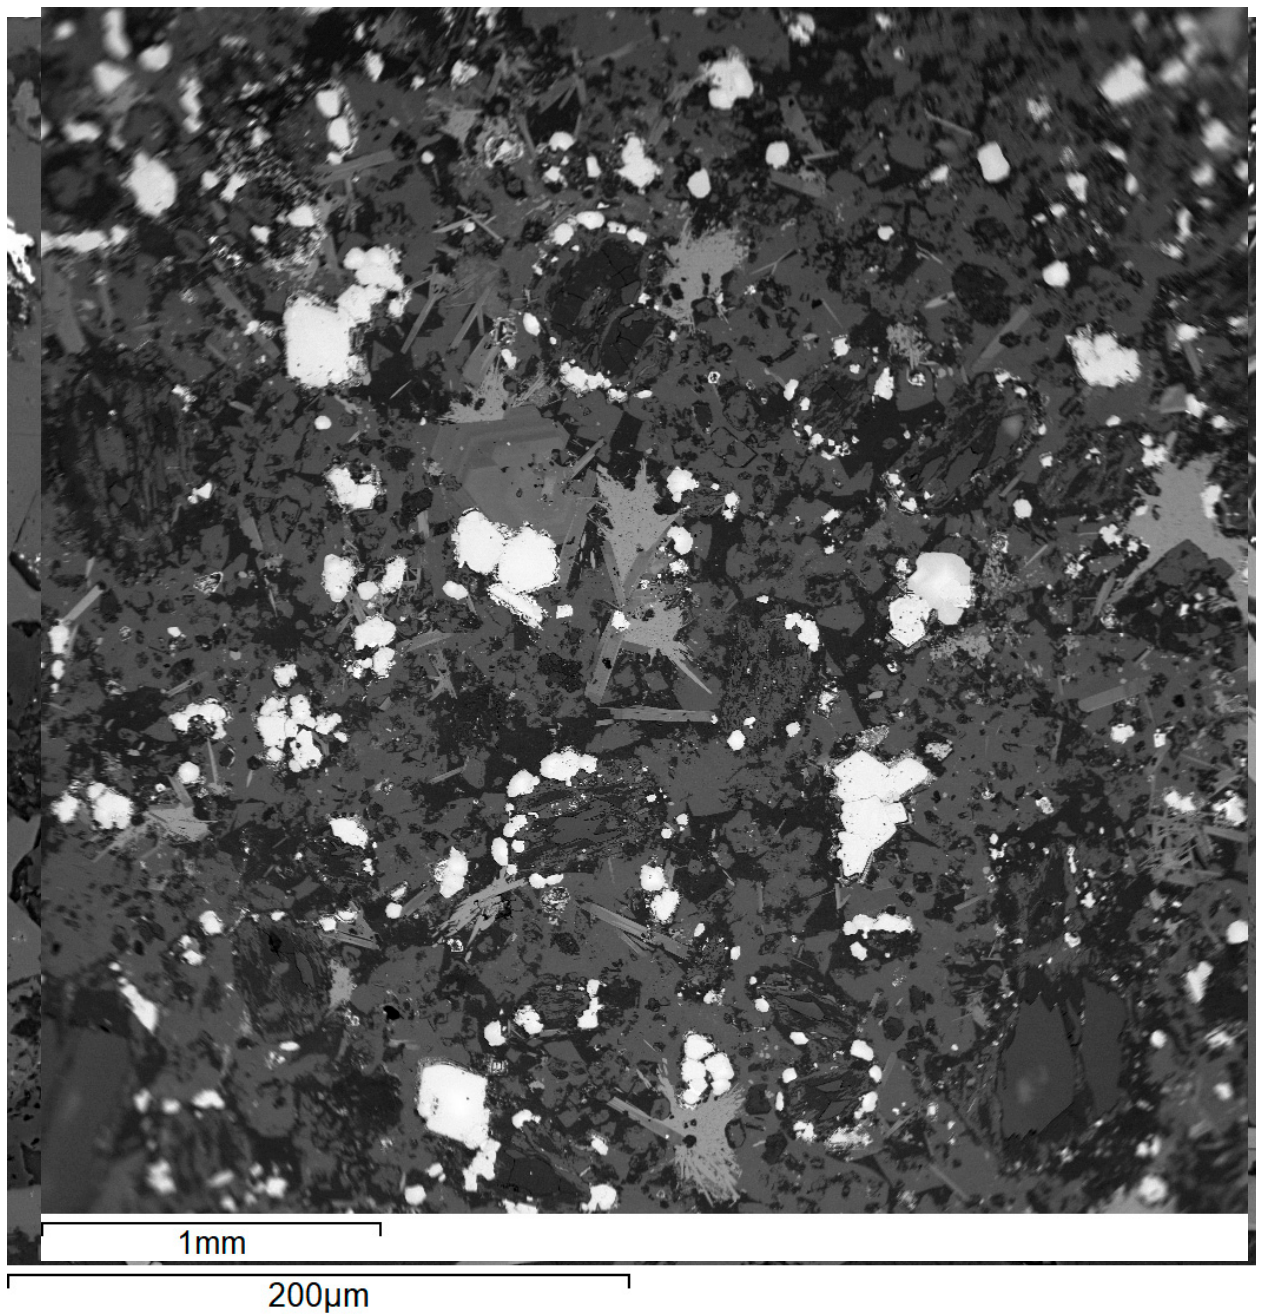

Fig. s9-1. Microphoto of kimberlite groundmass from Velikan dyke.

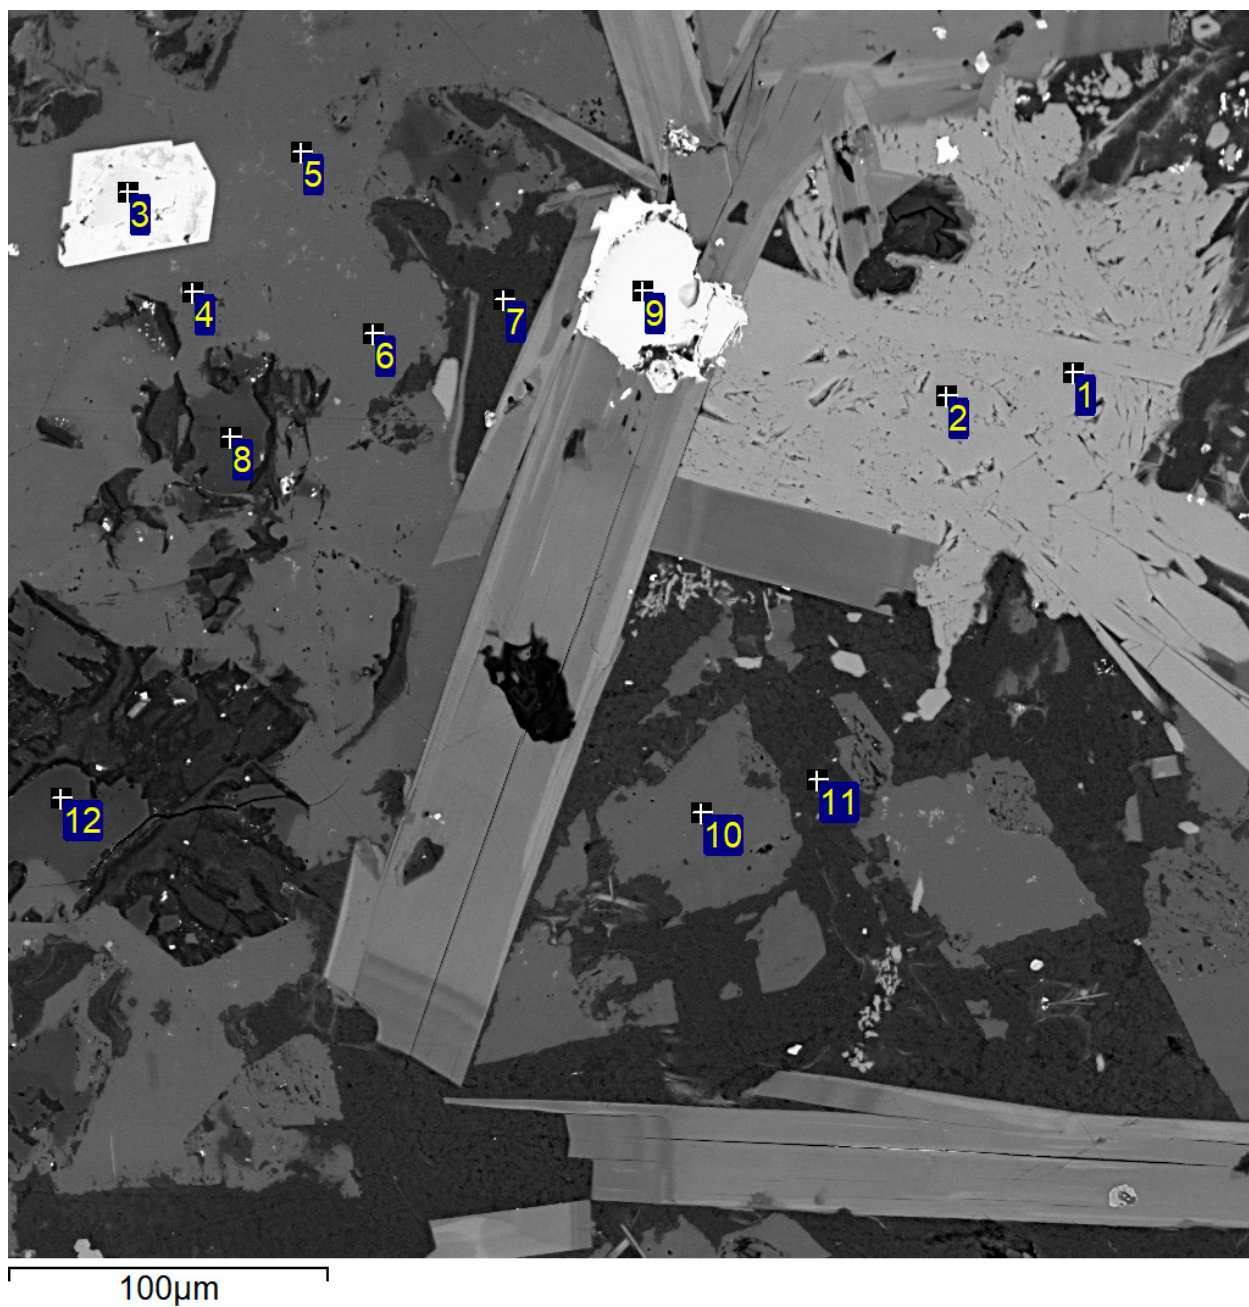

Fig. s9-2. Microphoto of kimberlite groundmass from Velikan dyke.

Table to Fig. s9-2.

| Spectrum | 1     | 2     | 3     | 4     | 5     | 6     | 7     | 8     | 9     | 10    | 11    | 12    |
|----------|-------|-------|-------|-------|-------|-------|-------|-------|-------|-------|-------|-------|
| Mineral  | Ap    | Ap    | Prvs  | Ap    | Cal   | Cal   | Srp   | Dol   | TiMag | Cal   | Srp   | Dol   |
| Total    | 94,14 | 94,59 | 97,42 | 97,37 | 53,83 | 53,52 | 85,93 | 48,48 | 96,41 | 53,97 | 84,19 | 48,79 |
| SiO2     | 0,86  | 1,03  |       | 0,9   |       |       | 39,92 |       | 0,19  |       | 39,11 |       |
| TiO2     |       |       | 56,13 |       |       |       | 0,45  |       | 19,1  |       | 0,37  | 0,17  |
| Al2O3    |       |       | 0,23  |       |       |       | 2,14  |       | 5,95  |       | 2,53  |       |
| FeO      |       |       | 1,17  |       | 0,13  |       | 8,04  | 0,64  | 55,69 | 0,19  | 7,73  | 1,05  |
| MnO      |       |       |       |       |       |       | 0,36  | 0,37  | 0,77  |       | 0,31  | 0,84  |
| MgO      |       |       |       |       |       |       | 34,86 | 15,74 | 14,56 |       | 33,95 | 15,47 |

|              |       |       |       |       |       |      |      |       |      |       |     |       |
|--------------|-------|-------|-------|-------|-------|------|------|-------|------|-------|-----|-------|
| <b>CaO</b>   | 51,88 | 52,27 | 37,68 | 54,11 | 53,03 | 52,9 | 0,17 | 31,19 | 0,14 | 52,95 | 0,2 | 30,74 |
| <b>Na2O</b>  |       |       | 0,49  |       |       |      |      |       |      | 0,16  |     |       |
| <b>K2O</b>   |       |       |       |       |       |      |      |       |      |       |     |       |
| <b>BaO</b>   |       |       |       |       |       |      |      | 0,27  |      |       |     |       |
| <b>SrO</b>   | 1,41  | 1,37  | 0     | 1,42  | 0,67  | 0,61 |      | 0,27  |      | 0,67  |     | 0,52  |
| <b>Nd2O3</b> |       |       | 0,85  |       |       |      |      |       |      |       |     |       |
| <b>Nb2O5</b> |       |       | 0,87  |       |       |      |      |       |      |       |     |       |
| <b>P2O5</b>  | 38,11 | 38,11 |       | 39,02 |       |      |      |       |      |       |     |       |
| <b>F</b>     | 1,89  | 1,81  |       | 1,92  |       |      |      |       |      |       |     |       |

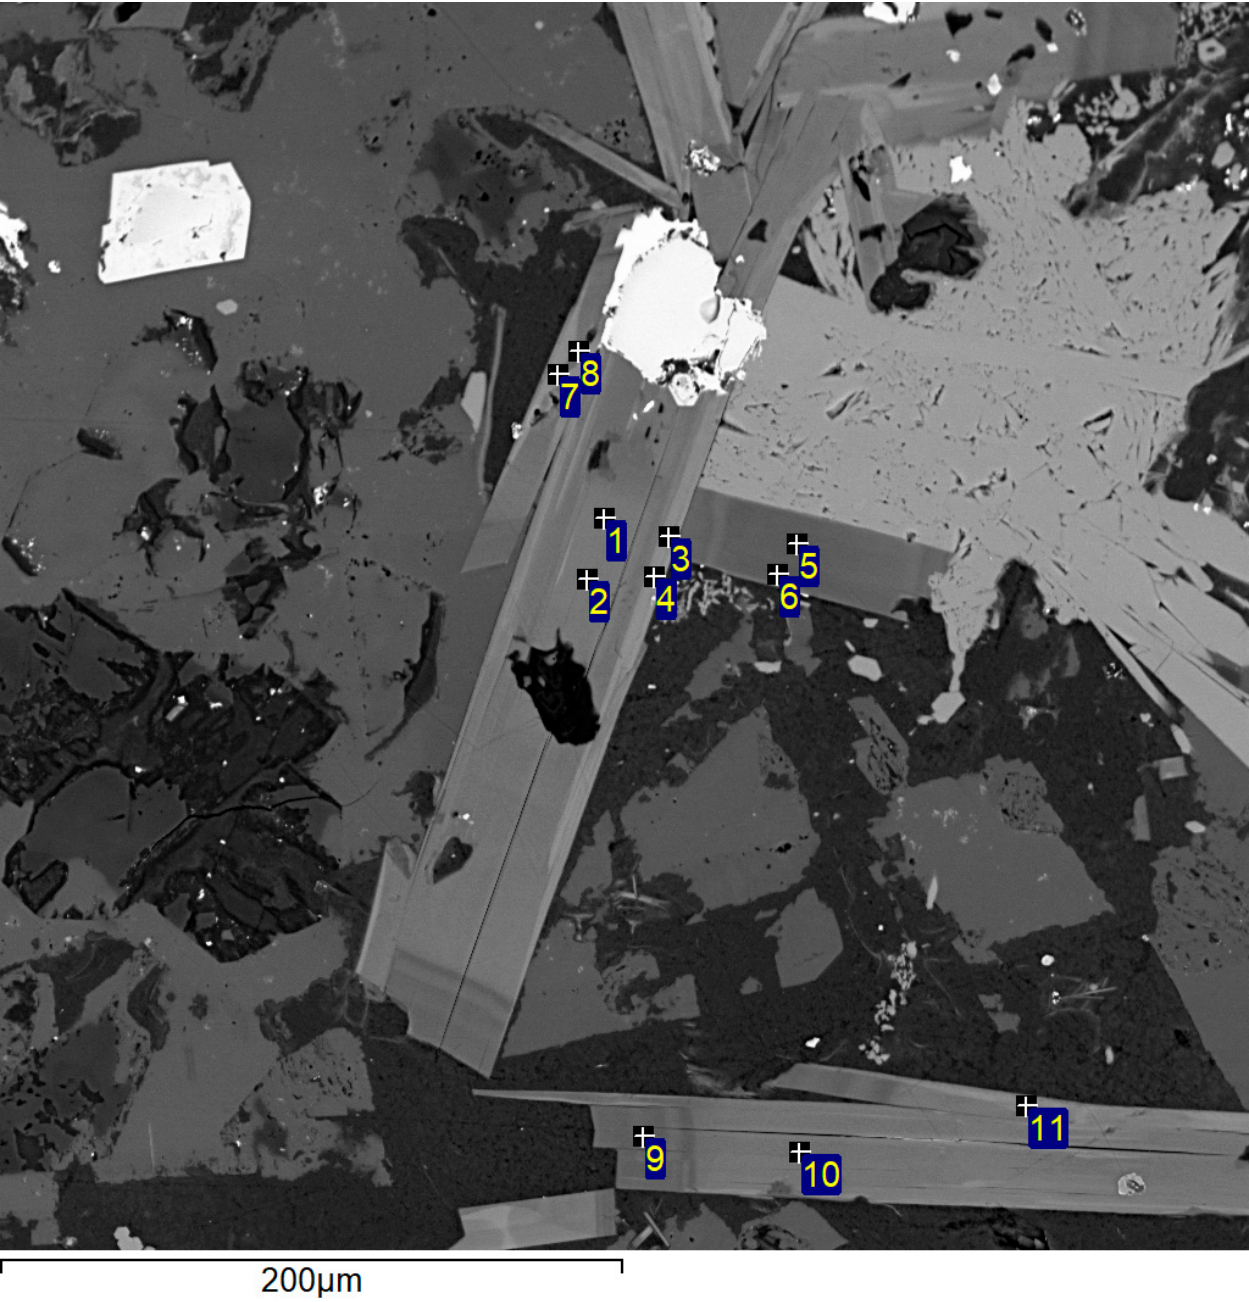

Fig. s9-3. Microphoto of kimberlite groundmass from Velikan dyke.

Table to Fig. s9-3.

| No analysis                    | 1     | 2     | 3     | 4     | 5     | 6     | 7     | 8     | 9      | 10    | 11    |
|--------------------------------|-------|-------|-------|-------|-------|-------|-------|-------|--------|-------|-------|
| Mineral                        | Phl    | Phl   | Phl   |
| Total                          | 95,28 | 95,32 | 94,19 | 93,2  | 93,18 | 92,27 | 99,2  | 97,31 | 100,02 | 97,19 | 97,69 |
| SiO <sub>2</sub>               | 34,08 | 33,93 | 31,06 | 30,76 | 35,21 | 34,98 | 32,84 | 35,28 | 37,67  | 34,34 | 33,42 |
| TiO <sub>2</sub>               | 0,78  | 0,72  | 1,05  | 1,15  | 0,75  | 0,67  | 0,95  | 0,68  | 0,88   | 0,87  | 0,95  |
| Al <sub>2</sub> O <sub>3</sub> | 18,27 | 18,27 | 18,78 | 18,63 | 17,35 | 17,04 | 19,35 | 18,2  | 17,46  | 19,35 | 19,93 |
| FeO                            | 2,89  | 3,04  | 2,74  | 2,62  | 2,69  | 2,64  | 2,95  | 3,33  | 2,86   | 2,95  | 2,82  |
| MnO                            |       |       |       |       |       |       |       |       |        |       |       |
| MgO                            | 23,98 | 23,96 | 22,93 | 22,77 | 24    | 23,83 | 24,78 | 25,01 | 26,35  | 24,34 | 24,44 |
| CaO                            |       |       | 0,14  |       |       |       |       | 0,18  |        |       |       |
| Na <sub>2</sub> O              |       |       |       |       |       |       |       |       |        |       |       |
| K <sub>2</sub> O               | 8,07  | 8,13  | 6,96  | 6,87  | 9,01  | 9,09  | 6,94  | 8,43  | 9,03   | 8,3   | 7,61  |
| BaO                            | 7,2   | 7,27  | 9,96  | 9,9   | 4,18  | 4,02  | 10,63 | 6,2   | 5,29   | 7,05  | 8,52  |
| SrO                            |       |       |       |       |       |       |       |       |        |       |       |
| Nd <sub>2</sub> O <sub>3</sub> |       |       |       |       |       |       |       |       |        |       |       |
| Nb <sub>2</sub> O <sub>5</sub> |       |       |       |       |       |       |       |       |        |       |       |
| P <sub>2</sub> O <sub>5</sub>  |       |       |       |       |       |       |       |       |        |       |       |
| F                              | 0     | 0     | 0,56  | 0,49  | 0     | 0     | 0,77  | 0     | 0,47   | 0     | 0     |

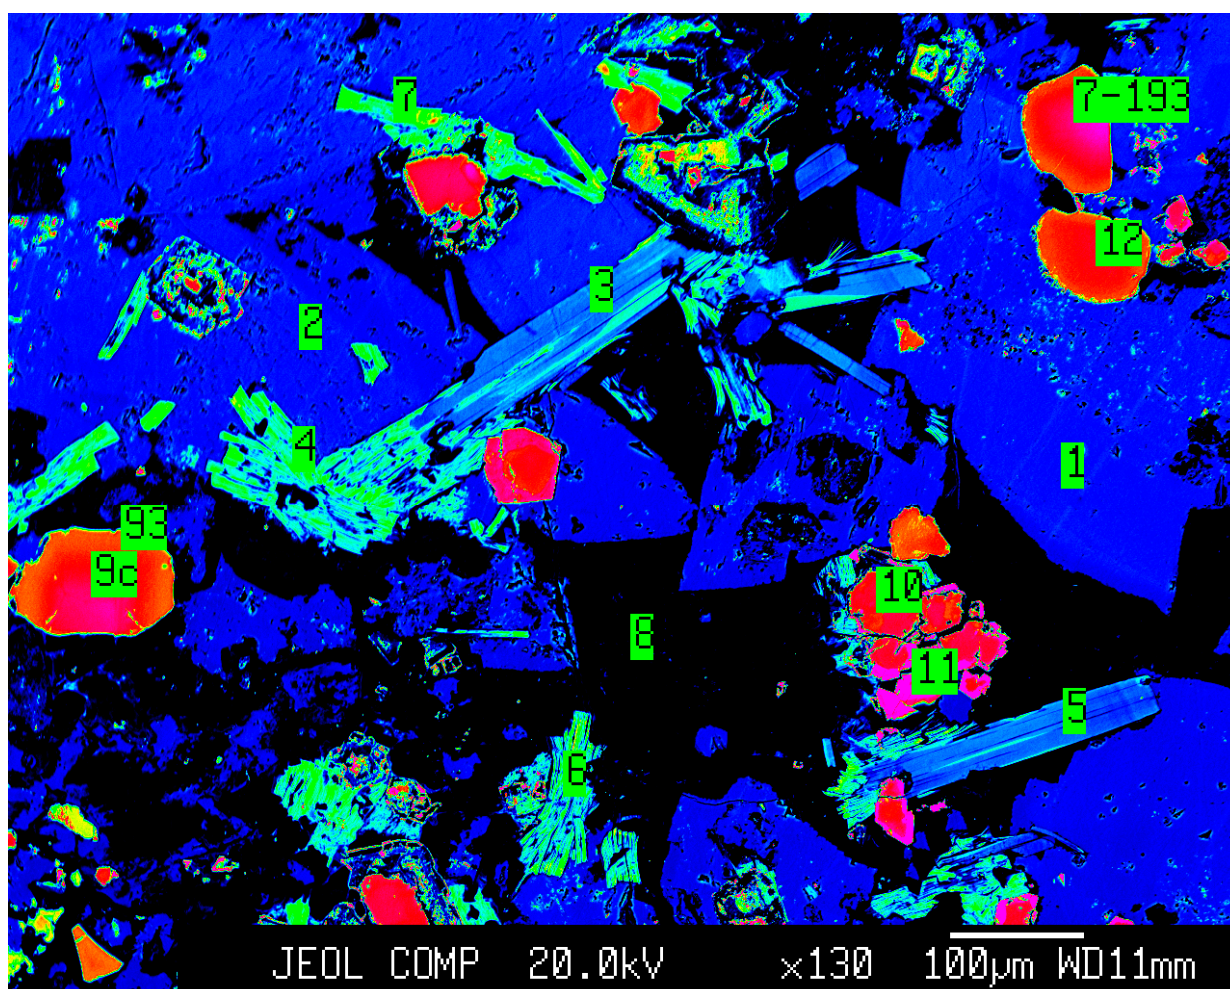

Fig. s9-4. Im42. Groundmass of kimberlite from Velikan dyke. Состав минералов приведен в таблице.

Table to Fig. s9-4. Im42.

| <b>Oxides</b> | im42-9c<br>Prvs         | im42-9r<br>Prvs            | im42-10<br>TiMt            | im42-11<br>TiMt            | im42-12<br>Prvs            |                            |
|---------------|-------------------------|----------------------------|----------------------------|----------------------------|----------------------------|----------------------------|
| <b>TiO2</b>   | 55.959                  | 54.921                     | 14.631                     | 18.639                     | 55.722                     |                            |
| <b>Al2O3</b>  | 0.224                   | 0.442                      | 11.038                     | 5.856                      | 0.266                      |                            |
| <b>Cr2O3</b>  | 0.006                   | 0.000                      | 0.119                      | 4.763                      | 0.000                      |                            |
| <b>FeO</b>    | 1.013                   | 1.562                      | 54.178                     | 48.759                     | 1.103                      |                            |
| <b>MnO</b>    | 0.000                   | 0.000                      | 0.638                      | 0.803                      | 0.000                      |                            |
| <b>MgO</b>    | 0.097                   | 0.000                      | 14.405                     | 15.368                     | 0.000                      |                            |
| <b>Total</b>  | 100.209                 | 99.148                     | 95.245                     | 94.361                     | 100.100                    |                            |
| <b>Oxides</b> | 7-193-<br>im42-2<br>Cal | 7-193-<br>im42-3<br>Ba-Phl | 7-193-<br>im42-4<br>Ba-Phl | 7-193-<br>im42-5<br>Ba-Phl | 7-193-<br>im42-6<br>Ba-Phl | 7-193-<br>im42-7<br>Ba-Phl |
| <b>SiO2</b>   | 0.000                   | 35.488                     | 29.370                     | 35.973                     | 29.327                     | 24.693                     |
| <b>TiO2</b>   | 0.000                   | 0.000                      | 0.000                      | 0.000                      | 0.000                      | 0.000                      |
| <b>Al2O3</b>  | 0.000                   | 16.037                     | 16.523                     | 15.621                     | 16.240                     | 18.142                     |
| <b>Cr2O3</b>  | 0.000                   | 0.000                      | 0.000                      | 0.000                      | 0.000                      | 0.000                      |
| <b>FeO</b>    | 0.049                   | 3.611                      | 4.401                      | 3.072                      | 4.089                      | 6.889                      |
| <b>MnO</b>    | 0.000                   | 0.060                      | 0.083                      | 0.000                      | 0.058                      | 0.000                      |
| <b>MgO</b>    | 0.006                   | 23.477                     | 26.946                     | 23.883                     | 26.001                     | 24.026                     |
| <b>CaO</b>    | 54.815                  | 0.070                      | 0.222                      | 0.102                      | 0.155                      | 0.413                      |
| <b>Na2O</b>   | 0.072                   | 0.112                      | 0.936                      | 0.100                      | 0.780                      | 0.903                      |
| <b>K2O</b>    | 0.000                   | 7.699                      | 1.095                      | 8.694                      | 1.127                      | 1.417                      |
| <b>NiO</b>    | 0.000                   | 0.000                      | 0.000                      | 0.000                      | 0.000                      | 0.000                      |
| <b>SrO</b>    | 0.408                   | 0.000                      | 0.137                      | 0.000                      | 0.100                      | 0.000                      |
| <b>BaO</b>    | 0.219                   | 6.012                      | 11.076                     | 4.906                      | 8.860                      | 15.254                     |
| <b>F</b>      | 0.138                   | 0.508                      | 1.412                      | 0.524                      | 1.172                      | 1.777                      |
| <b>Total</b>  | 55.735                  | 92.888                     | 91.652                     | 92.670                     | 87.448                     | 92.808                     |
