# Supplementary material
Source: MDPI journal article supplement (https://www.mdpi.com/2075-163X/13/11/1404)
Supplement: s1 [file s1 › Figure captions.pdf]

## Figure captions

Fig. 1. Map of Yakutian kimberlite province.

Fig. 2. The photos of thin sections of samples: a - 7-392. Pyroclastic kimberlite with essentially serpentine groundmass. Rounded Ol porphyroclasts partly substituted by serphophite, with some preserved relict fresh Ol; b - 7-269. Pyroclastic kimberlite with inclusion of coherent kimberlite containing calcite microcrysts (below). c - 7-384. Coherent kimberlite with groundmass of essentially carbonate composition; d - 7-387. Coherent kimberlite with groundmass of calcite-serpentine composition. Fluidal texture produced by aligned olivine phenocrysts; e - 7-386. Fine-grain coherent kimberlite with phlogopite microlites in groundmass; f - 7-388. Coherent kimberlite, enriched by Phl macrocrysts.

Fig. 3. The photos of thin sections of samples from Velikan dyke: a -

Fig. 4. Correlation diagrams of  $\text{SiO}_2$  vs.  $\text{MgO}$ ,  $\text{CaO}$ ,  $\text{FeO}$ ,  $\text{TiO}_2$  for Obnazhennaya kimberlite.

1 – pyroclastic kimberlite; 2 – coherent kimberlite; 3 – inclusions of micaceous kimberlite.

Fig. 5. Correlation diagrams of carbonate component vs. major oxides and trace elements for Obnazhennaya kimberlite. See legend from Fig.3.

Fig. 6. Correlation diagrams of  $\text{MgO}$  vs.  $\text{Ni}$ ,  $\text{Co}$ ,  $\text{Cr}$ ,  $\text{V}$  for Obnazhennaya kimberlite. See legend from

Fig. 7. Obnazhennaya kimberlites in trace-element spider diagram. The gray-colored field corresponds to the compositions of kimberlites from diamond-bearing pipes (Kostrovitsky et al., 2007).

Fig. 8. a - ( $^{87}\text{Sr}/^{86}\text{Sr}$ )<sub>0</sub> -  $\epsilon\text{Nd}$  diagram for kimberlites from: 1 - diamond deposits, 2 - Obnazhennaya pipe, 3 - other pipes of Kuoika field. Arroëw points to  $^{87}\text{Sr}/^{86}\text{Sr}$  evolution trend. Composition fields for kimberlites I and kimberlites II are after (Mitchell, 1986; Smith, 1983; Tainton and McKenzie, 1994). PREMA field is after (Zindler and Hart, 1986); b -  $\epsilon\text{Nd}$ - $\epsilon\text{Hf}$  diagram for kimberlites from: 1 - diamond deposits, 2 - Obnazhennaya pipe, 3 - other pipes of Kuoika field, 4 - South Africa (Nowell et al, 2004). Composition fields of group I and group II kimberlites are after (Nowell et al, 2004).

Fig. 9. Correlation diagrams of  $\text{MgO}$  vs.  $\text{NiO}$  for macrocryst and microcryst zonal olivines from Obnazhennaya pipe. Olivines from kimberlites: 7-237 – pyroclastic kimberlite; 7-386 and 7-387 - coherent kimberlite.

Fig. 10. *P-T* diagram for clinopyroxenes from Obnazhennaya kimberlite (*P-T* estimates according Nimis and Taylor, 2000). 1-macrocrysts, 2-mantle xenoliths.

## Supplementary Figures captions

Fig. s1.A. The photo of outcrops of Obnazhennaya pipe.

Fig. s1.B. The photo of outcrops of Velikan dyke.

Fig. s2. The photo of thin section of sample 7-234. Obnazhennaya pipe (plane polarized light, PPL). Pyroclastic kimberlite with Cal-Srp groundmass, with relicts of fresh Ol.

Fig. s2-1. The photo of thin section of sample 7-243 (PPL). Obnazhennaya pipe. Pyroclastic kimberlite with inclusion of coherent kimberlite containing calcite microcrysts.

Fig. s2-2. The photo of thin section of sample 7-257 (PPL). Obnazhennaya pipe. Pyroclastic kimberlite with inclusion of coherent kimberlite containing calcite microcrysts.

Fig. s2-3. The photo of thin section of sample 7-325 (PPL). Obnazhennaya pipe. Coherent kimberlite with groundmass of essentially carbonate composition.

Fig. s3.  $\text{CaO}$  vs.  $\text{Cr}_2\text{O}_3$  for garnet macrocrysts from Obnazhennaya pipe.

Fig. s4. Plots for spinel from Obnazhennaya pipe: A - of  $\text{Cr}_2\text{O}_3$  vs.  $\text{Al}_2\text{O}_3$ , and B – of  $\text{Mg}/(\text{Mg}+\text{Fe})\times 100$  vs. 1 - kimberlite heavy fraction, 2 – glimmerite, 3 - peridotitic xenoliths.

Fig. s5. Plots: A - of  $\text{Mg}/(\text{Mg}+\text{Fe})\times 100$  vs.  $\text{Cr}_2\text{O}_3$ ; and B –  $\text{Ca}/(\text{Ca}+\text{Mg})\times 100$  vs.  $\text{Cr}_2\text{O}_3$  for clinopyroxenes from Obnazhennaya kimberlite. Clinopyroxenes are from: 1 - kimberlite heavy fraction, 2 - mantle xenoliths, 3 - glimmerite.

Fig. s6. Plots  $\text{TiO}_2$ - $\text{BaO}$  &  $\text{FeO}$ - $\text{Al}_2\text{O}_3$  for groundmass phlogopite from Obnazhennaya kimberlite. Samples: 1 - 7-293 (pyroclastic kimberlite), 2 - 7-384 (coherent kimberlite), 3 - 7-386 (Phl coherent kimberlite).

Fig. s7-1, 2, 3. The photo of thin sections of coherent kimberlite samples from Velikan dyke.

Fig. s8. The photo of thin section of sample 90-20 from Rudniy dvor dyke (Ary-Mastakh field). Almost all olivine microcrysts are idiomorphic.
