# Supplementary material
Source: MDPI journal article supplement (https://www.mdpi.com/2075-163X/13/11/1404)
Supplement: s1 [file s1 › List of tables for article.pdf]

### **List of tables, included to article**

Table 1. Representative chemical compositions of kimberlites from Obnazhennaya pipe and Velikan dyke..

Table 2. ICP-MS analysis of trace elements in kimberlites from Obnazhennaya pipe and Velikan dyke.

Table 3. Trace elements abundances and Sr, Nd and Hf isotopic composition for kimberlites of Yakutian province.

Table 4. Variation ranges (numerator) and average (denominator) contents of major oxides in macrocrysts and groundmass zoned euhedral olivine microcrysts from Obnazhennaya kimberlites.

Table 5. Variation ranges (numerator) and average contents (denominator) of major oxides and trace elements in olivine from mantle xenoliths in Obnazhennaya kimberlites.

Table 6. Chemical composition of Ol from Velikan dyke (sample of kimberlite - 7-193).

### **Tables in Supplementary**

Table s1. Major oxide compositions of Obnazhennaya kimberlite.

Table s2. Representative EMPA analyses of zoned microcryst Ol from Obnazhennaya kimberlites.

Table s3. Compositions of macrocryst garnets from Obnazhennaya kimberlites.

Table s4. Compositions of Mg-ilmenite from Obnazhennaya kimberlites.

Table s5. Compositions of spinel macrocrysts from Obnazhennaya kimberlites.

Table s6. Compositions of Cpx from Obnazhennaya kimberlites.

Table s7. Representative EMPA analyses of Phl from Obnazhennaya and groundmass kimberlites Velikan dyke.

Table s8. Representative analyses of perovskite from Obnazhennaya pipe and Velikan dyke, wt%.

Table s9. Compositions of calcite and dolomite from Obnazhennaya pipe, and Velikan dyke, wt%.

Table s10. Compositions of minerals from Velikan dyke.

Table s11. Composition of Ol from Kuoika and Ary-Mastakh fields.
