# Supplementary material
Source: MDPI journal article supplement (https://www.mdpi.com/2075-163X/13/11/1404)
Supplement: s1 [file s1 › Table s1. Major- and trace-element compositions of Obnazhennaya kimberlite..xlsx]

## Sheet: Лист1
Table s1. Major oxide compositions of Obnazhennaya kimberlite.
	1	2	3	4	5	6	7	8	9	10
№	7-234	7-237	7-238	7-243	7-245	7-257	7-269	7-276	7-280	7-281
SiO2	33.25	31.16	34.93	31.5	33.39	30.63	31.41	33.37	31.88	33.74
TiO2	0.57	0.6	0.33	0.4	0.49	0.83	0.79	0.67	0.7	0.45
Al2O3	2.87	1.82	2.12	2.11	1.72	2.09	2.61	2.14	1.93	1.8
FeOtot	7.76	7.62	7.68	7.25	7.56	7.51	7.6	7.89	7.42	7.77
FeO	2.4	1.26	2.7	3.14	3.43	1.97	2.34	2.88	2.71	3.88
Fe2O3	5.95	7.06	5.53	4.56	4.58	6.15	5.84	5.56	5.23	4.32
MnO	0.13	0.14	0.13	0.15	0.12	0.13	0.14	0.12	0.12	0.11
MgO	32.67	32.22	34.28	33.38	32.91	30.51	29.24	30.93	31.56	35.78
CaO	6.98	8.45	4.39	7.45	6.99	8.42	7.63	6.31	7.37	6.32
Na2O	0.11	0.08	0.16	0.08	0.09	0.08	0.15	0.09	0.11	0.09
K2O	0.69	0.73	0.81	0.53	0.59	0.71	0.98	0.89	0.8	0.6
P2O5	0.49	0.79	0.27	0.47	0.49	0.24	0.33	0.27	0.32	0.53
H2O	7.84	8.23	10.35	9.88	9.13	11.11	12.04	11.42	11.1	6.77
CO2	5.48	6.64	3.45	5.85	5.49	6.61	5.99	4.96	5.79	4.96
Total	99.43	99.18	99.45	99.5	99.42	99.48	99.49	99.61	99.62	99.35
C.I.	1.09	0.98	1	1.06	0.99	1.05	1.05	1.13	1.12	1.05
Ilm. I.	0.24	0.22	0.24	0.22	0.22	0.24	0.26	0.27	0.26	0.24
	11	12	13	14	15	16	17	18	19	20
№	7-284	7-286	7-301	7-324	7-326	7-327	7-383	7-389	7-392	7-242
SiO2	33.62	33.05	33.8	32.86	35.55	33.14	33.02	29.84	32.65	25.6
TiO2	0.48	0.45	0.41	0.46	0.26	0.51	0.45	0.44	0.45	0.82
Al2O3	1.64	1.56	2.08	1.85	1.18	1.67	1.97	1.54	1.89	2.23
FeOtot	7.83	7.8	7.47	7.45	7.99	7.88	7.83	7.14	7.5	6.76
FeO	3.88	4.33	2.33	3.4	4.44	2.86	3.78	2.94	3.59	3.24
Fe2O3	4.38	3.85	5.7	4.5	3.94	5.58	4.49	4.66	4.34	3.9
MnO	0.11	0.13	0.12	0.16	0.14	0.12	0.11	0.14	0.13	0.2
MgO	36.32	36.05	33.11	33.45	37.39	33.92	34.61	31.34	34.76	26.91
CaO	6.48	7.19	5.39	8.55	6.3	6.79	6.77	11.58	7.68	16.56
Na2O	0.09	0.09	0.08	0.15	0.12	0.11	0.12	0.11	0.11	0.18
K2O	0.55	0.52	0.58	0.94	0.52	0.74	0.6	0.62	0.64	0.98
P2O5	0.54	0.5	0.34	0.44	0.3	0.44	0.5	0.5	0.55	1.32
H2O	6.3	6.08	11.14	5.92	4.2	8.13	7.61	6.72	6.67	4.29
CO2	5.09	5.65	4.23	6.72	4.95	5.33	5.32	9.1	6.03	13
Total	99.48	99.45	99.31	99.4	99.29	99.34	99.35	99.53	99.49	99.23
C.I.	0.98	0.96	0.95	1.07	1.01	0.97	1	1.1	0.99	1
Ilm. I.	0.22	0.22	0.22	0.23	0.22	0.21	0.23	0.22	0.23	0.26
	21	22	23	24	25	26	27	28	29	30
№	7-268	7-276	7-325	7-328	7-384	7-386	7-387	7-402	7-388	7-390
SiO2	25.54	24.59	28.4	29.04	24.56	20.67	32	27.48	32.34	35.87
TiO2	0.91	0.93	0.78	0.31	1.35	1.25	0.47	0.73	4.75	4.69
Al2O3	2.31	1.97	2.04	1.75	2.65	2.92	2.69	2.36	3.72	4.2
FeOtot	6.63	7.1081	7.65	6.75	8.16	7.36	6.85	7.07	9.73	8.39
FeO	1.69	3.03	2.51	3.53	3.43	1.43	2.51	2.7	4.1	4.78
Fe2O3	5.48	4.53	5.7	3.57	5.25	6.58	4.81	4.85	6.25	4
MnO	0.18	0.24	0.15	0.18	0.26	0.2	0.15	0.18	0.12	0.09
MgO	25.05	24.13	28.48	30.54	25.25	20.43	30.78	28.39	28.71	30.69
CaO	15.17	18	13.6	13.13	16.52	20.42	8.92	12.99	4.56	1.55
Na2O	0.11	0.11	0.13	0.13	0.15	0.19	0.15	0.13	0.15	0.12
K2O	1.08	1.05	1.12	1.1	1.35	1.14	1	0.83	2.28	2.8
P2O5	0.37	0.47	0.61	0.67	0.83	1.12	0.64	0.94	0.17	0.08
H2O	8.63	6.25	4.92	5	4.61	5.13	8.46	7.11	8.62	9.31
CO2	12.33	14.14	10.68	10.31	12.98	16.04	7.01	10.2	3.58	1.22
Total	98.85	99.44	99.12	99.26	99.19	97.52	99.6	98.89	99.35	99.4
C.I.	1.07	1.06	1.03	1.01	0.98	1.03	1.1	1.17	1.03	1.2
Ilm. I.	0.28	0.31	0.27	0.24	0.22	0.34	0.38	0.44	0.26	0.36
1-19 - pyroclastic kimberlite breccia; 20-28 - hypabyssal kimberlites; 29-30 - hypabyssal mica kimberlite. C.I. = (SiO2 + Al2O3 + Na2O) / (MgO + K2O); Ilm. I = (FeOtot + TiO2) / (2K2O + MgO).
