# Supplementary material
Source: MDPI journal article supplement (https://www.mdpi.com/2075-163X/13/11/1404)
Supplement: s1 [file s1 › Table s2. Representative EMPA analyses of zoned microcryst olivines from Obnazhennaya kimberlites.xlsx]

## Sheet: Лист1
Table 2. Representative EMPA analyses of zoned microcryst olivines from Obnazhennaya kimberlites, wt%.
No.	Comment	Minerals	SiO2	TiO2	Al2O3	Cr2O3	FeO	MnO	MgO	CaO	NiO	Total	fe#
1	237-im4-1	macrocryst	41.213	0.006	0	0.019	7.649	0.103	48.739	0.005	0.409	98.286	8.09159
2	237-im4-2	macrocryst	39.767	0	0.09	0.014	7.273	0.1	47.953	0.027	0.405	95.793	7.84124
3	237-im4-3	macrocryst	41.032	0	0	0	8.43	0.106	49.24	0	0.421	99.287	8.7626
4	237-im13-1	macrocryst	41.298	0.002	0	0	7.203	0.094	50.978	0.01	0.395	100.152	7.34434
5	237-im13-2c	macrocryst	41.618	0	0.022	0.013	7.973	0.094	50.63	0	0.403	100.876	8.11706
6	237-im13-7c	macrocryst	39.185	0.014	0.116	0.006	7.042	0.087	45.353	0.383	0.391	92.996	8.01252
7	237-im14-1	macrocryst	40.531	0.011	0.006	0	7.523	0.075	50.638	0	0.433	99.298	7.69306
8	237-im15-1	macrocryst	41.959	0	0.036	0.007	7.711	0.11	50.857	0	0.414	101.184	7.83895
Average (8)			40.8	0	0.03	0.01	7.6	0.1	49.3	0.05	0.41	98.3	7.95967
1	237-im4-4c	micro centr	40.526	0.009	0.012	0	7.271	0.075	50.34	0.022	0.424	98.827	7.4954
2	237-im4-5c	micro centr	41.189	0	0	0.004	7.457	0.086	50.167	0.046	0.377	99.532	7.69685
3	237-im4-6r	micro centr	41.293	0.005	0	0.017	7.062	0.082	48.153	0.02	0.35	97.152	7.60183
4	237-im7-4	micro centr	41.572	0.001	0.013	0.01	7.218	0.091	50.499	0.051	0.359	99.939	7.42313
5	237-im7-6c	micro centr	40.623	0.013	0	0.008	7.221	0.107	49.778	0.091	0.368	98.306	7.52545
6	237-im7-7	micro centr	41.81	0	0	0.011	7.133	0.103	48.995	0.093	0.372	98.605	7.55049
7	237-im13-3c	micro centr	40.153	0.012	0.034	0.009	7.925	0.083	47.976	0.036	0.358	96.642	8.48082
8	237-im13-4c	micro centr	40.539	0.011	0	0	7.789	0.108	49.907	0.017	0.397	98.92	8.05045
9	237-im16-2	micro centr	40.819	0	0.102	0	7.42	0.091	51.151	0	0.397	100.099	7.52529
Average (9)		micro centr	40.95	0.01	0.02	0.01	7.39	0.09	49.66	0.04	0.38	98.55	7.70489
1	237-im4-4r	micro rim	40.98	0.034	0	0.079	12.629	0.194	46.203	0.109	0.109	100.425	13.2951
2	237-im4-5r	micro rim	41.121	0.014	0.014	0.043	12.343	0.186	46.547	0.124	0.239	100.717	12.9494
3	237-im4-6c	micro rim	40.593	0.018	0.023	0.049	12.937	0.253	46.216	0.109	0.077	100.405	13.5721
4	237-im7-4r	micro rim	39.058	0.034	0.107	0.038	12.325	0.181	45.256	0.083	0.266	97.472	13.253
5	237-im7-6r	micro rim	40.071	0.025	0.055	0.068	12.22	0.209	45.569	0.099	0.176	98.614	13.0764
6	237-im13-3r	micro rim	39.525	0.011	0.04	0.077	11.99	0.151	47.504	0.044	0.247	99.902	12.403
7	237-im14-2	micro rim	39.781	0.037	0	0.066	12.386	0.19	46.415	0.038	0.124	99.149	13.0208
8	237-im16-1	micro rim	40.957	0.02	0	0.056	11.826	0.195	47.419	0.046	0.162	100.826	12.2735
Average (8)		micro rim	40.26	0.02	0.03	0.06	12.33	0.19	46.39	0.08	0.18	99.54	12.9757
1	386-im39-t4	micro centr	40.307	0.035	0	0.062	10.173	0.111	48.688	0.071	0.354	99.89	10.4916
2	386-im35-2c	micro centr	40.33	0.019	0.01	0.067	9.499	0.118	48.928	0.052	0.379	99.49	9.82142
3	386-im38-1c	micro centr	40.967	0.006	0.032	0.018	7.771	0.079	50.991	0	0.356	100.346	7.87601
4	386-im38-3c	micro centr	40.91	0	0.015	0.001	8.55	0.098	49.81	0.017	0.416	99.959	8.7836
5	386-im39-1c	micro centr	41.086	0.038	0.095	0.042	10.342	0.102	47.949	0.077	0.321	100.215	10.7937
6	386-im39-2c	micro centr	41.595	0.014	0.013	0	7.68	0.088	50.915	0.013	0.358	100.764	7.80169
Average (6)		micro centr	40.87	0.02	0.03	0.03	9	0.1	49.55	0.04	0.36	100	9.24718
1	386-im38-3r	micro rim	40.633	0	0.005	0.044	11.224	0.136	47.873	0.095	0.392	100.523	11.6237
2	386-im42-1	micro rim	40.726	0.041	0	0.129	11.295	0.182	47.723	0.145	0.238	100.712	11.721
3	386-im35-1	micro rim	41.401	0.011	0.003	0.029	11.994	0.148	48.427	0.054	0.316	102.578	12.199
4	386-im35-2r	micro rim	40.407	0.037	0	0.083	11.408	0.149	48.133	0.088	0.285	100.629	11.7355
5	386-im38-1r	micro rim	41.17	0.029	0.033	0.102	11.609	0.144	46.469	0.083	0.384	100.149	12.292
6	386-im38-2	micro rim	40.546	0.039	0.021	0.117	11.639	0.16	47.065	0.056	0.355	100.108	12.1828
7	386-im39-1r	micro rim	40.507	0.042	0.011	0.083	11.658	0.172	47.911	0.092	0.264	100.881	12.0107
8	386-im39-2r	micro rim	41.011	0.042	0.023	0.162	11.476	0.176	47.289	0.09	0.312	100.675	11.9826
9	386-im42-1	micro rim	40.28	0.038	0	0.114	11.268	0.148	48.274	0.086	0.326	100.74	11.5783
Average (9)		micro rim	40.74	0.03	0.01	0.1	11.51	0.16	47.68	0.09	0.32	100.64	11.927
1	387-ol z 2x1mm	macrocryst	41.093	0	0.038	0	7.172	0.094	50.291	0.002	0.407	99.253	7.40757
2	387-IM68 3	macrocryst	41.335	0	0.032	0.004	7.955	0.106	50.556	0	0.368	100.395	8.11112
3	387-im51-6	macrocryst	41.449	0.011	0.026	0	7.371	0.11	50.004	0	0.382	99.459	7.63777
4	387-im51-7	macrocryst	41.32	0	0	0	7.246	0.092	50.82	0	0.415	99.908	7.40621
5	387-im51-8	macrocryst	41.293	0	0	0	7.16	0.097	51.168	0.012	0.385	100.261	7.27855
6	387-im53-5	macrocryst	41.288	0.021	0.008	0.008	6.962	0.088	50.52	0.006	0.382	99.42	7.17598
7	387-im53-6	macrocryst	41.569	0.02	0.034	0	7.411	0.083	50.873	0.01	0.415	100.548	7.55482
8	387-im53-7	macrocryst	41.342	0	0.042	0.006	7.407	0.111	50.402	0	0.367	99.857	7.61624
9	387-im65-6	macrocryst	42.154	0.012	0.065	0	6.646	0.053	51.006	0.001	0.366	100.473	6.81163
10	387-IM68-2	macrocryst	38.427	0.001	0.061	0.031	12.614	0.118	46.457	0.065	0.365	98.206	13.2184
11	387-im53-4	macrocryst	40.258	0	0	0.018	9.995	0.128	48.773	0.188	0.353	99.83	10.3108
12	387-IM68-2	macrocryst	41.62	0	0	0.01	8.63	0.1	50.77	0	0.39	101.52	8.70559
13	387-IM68-2	macrocryst	40.15	0	0.075	0.06	11.06	0.11	47.72	0.043	0.32	99.54	11.5059
14	387-IM68-2	macrocryst	40.68	0	0	0.006	9.65	0.12	49.27	0.093	0.31	100.13	9.89968
Average (14)			41	0.005	0.027	0.01	8.38	0.1	49.9	0.03	0.37	99.82	8.62
1	387-im51-1c	micro centr	40.823	0	0	0.013	7.328	0.084	50.241	0.013	0.413	99.101	7.56347
2	387-im51-2c	micro centr	39.846	0.014	0.03	0	7.772	0.093	50.056	0.003	0.398	98.42	8.01229
3	387-im51-3c	micro centr	41.497	0.017	0.093	0.029	6.828	0.08	51.02	0.036	0.356	100.044	6.98335
4	387-im51-4c	micro centr	41.354	0	0	0	7.127	0.09	49.72	0	0.404	98.832	7.4428
5	387-im51-5c	micro centr	41.096	0.016	0.006	0.008	7.141	0.096	51.652	0.006	0.386	100.547	7.1975
6	387-im53-1c	micro centr	40.634	0	0.044	0	7.314	0.119	49.273	0.021	0.377	97.973	7.68704
7	387-im53-2c	micro centr	40.715	0.021	0.019	0	6.733	0.095	50.994	0.025	0.369	99.006	6.89616
8	387-im59-4c	micro centr	41.025	0	0.037	0	7.033	0.094	50.781	0.009	0.388	99.558	7.20932
9	387-im65-1c	micro centr	40.909	0	0.064	0.044	9.162	0.103	48.581	0.029	0.389	99.471	9.5675
10	387-im65-3c	micro centr	41.011	0.01	0	0.024	7.834	0.105	50.929	0	0.396	100.45	7.94369
11	387-im654c	micro centr	40.388	0	0	0	8.348	0.104	50.165	0.019	0.343	99.466	8.5383
12	387-IM67-2c	micro centr	41.273	0.009	0.001	0.002	7.222	0.079	50.538	0.032	0.335	99.575	7.42163
13	387-IM67-3c	micro centr	40.736	0.019	0.001	0	6.495	0.1	50.916	0.009	0.35	98.668	6.67818
14	387-im65-2c idio 2,5x1,5	micro centr	40.703	0.028	0.051	0.045	12.172	0.119	46.918	0.081	0.268	100.5	12.7047
15	387-im65-7 idio 0,5x2,4	micro centr	40.466	0.026	0	0.067	12.347	0.189	46.611	0.027	0.263	100.055	12.9376
Average (15)		micro centr	40.83	0.01	0.02	0.02	8.06	0.1	49.89	0.02	0.36	99.31	8.30987
1	387-im51-1r	micro rim	40.617	0.008	0	0.106	11.866	0.176	46.262	0.035	0.142	99.261	12.579
2	387-im51-2r	micro rim	40.959	0.021	0.027	0.046	13.644	0.184	45.578	0.072	0.306	101.002	14.3787
3	387-im51-3r	micro rim	39.526	0.026	0	0.068	12.207	0.156	46.564	0.087	0.273	99.036	12.821
4	387-im51-4r	micro rim	40.803	0	0	0.067	12.125	0.184	47.242	0.106	0.152	100.791	12.5859
5	387-im51-5r	micro rim	40.949	0.029	0.009	0.028	12.494	0.228	46.012	0.144	0.119	100.155	13.2192
6	387-im53-1r	micro rim	39.842	0.027	0	0.045	12.298	0.171	46.105	0.071	0.127	98.791	13.016
7	387-im53-2r	micro rim	40.514	0.048	0	0.068	12.509	0.159	46.863	0.088	0.231	100.57	13.0239
8	387-im53-3c	micro rim	39.459	0.011	0.06	0.011	12.685	0.107	46.368	0.066	0.322	99.181	13.305
9	387-im59-4r	micro rim	40.207	0.02	0.036	0.047	12.395	0.184	46.727	0.076	0.261	100.1	12.9533
10	387-im65-1r	micro rim	40.754	0.02	0	0.065	11.959	0.158	46.977	0.07	0.169	100.256	12.4964
11	387-im65-3r	micro rim	41.042	0.026	0	0.09	12.264	0.231	46.58	0.08	0.092	100.541	12.8693
12	387-IM67-2r	micro rim	40.701	0.028	0	0.054	12.186	0.188	47.2	0.073	0.272	100.765	12.6511
Average (12)		micro rim	40.45	0.02	0.01	0.06	12.39	0.18	46.54	0.08	0.21	99.94	12.994
1	392-ol-1	macrocryst	41.16	0	0	0.02	7.57	0.08	50.41	0	0.42	99.66	7.76968
2	392-ol-2	macrocryst	40.84	0.01	0	0	8.67	0.08	49.55	0	0.39	99.54	8.93842
3	392-ol-3	macrocryst	41.46	0.02	0.03	0	7.96	0.12	49.6	0.01	0.37	99.57	8.25931
4	392-ol-4	macrocryst	39.78	0.03	0.013	0	7.74	0.06	51.59	0.003	0.38	99.6	7.76302
5	392-ol-5	macrocryst	40.74	0.01	0.01	0.003	7.19	0.09	51.13	0.006	0.37	99.55	7.31186
6	392-ol-6	macrocryst	41.15	0.01	0.003	0.011	8.6	0.11	50.53	0.079	0.4	100.89	8.71558
7	392-ol-7	macrocryst	40.83	0	0.015	0	7.99	0.1	49.98	0	0.35	99.26	8.23003
8	392-ol-8	macrocryst	41	0.01	0	0.01	8.04	0.09	51.12	0	0.38	100.65	8.10765
Average (8)			40.87	0.01	0.01	0.01	7.97	0.09	50.49	0.01	0.38	99.84	8.13493
1	392-im33-1c	micro centr	40.63	0	0.02	0	9.75	0.05	48.83	0	0.41	99.69	10.073
2	392-im33-2c	micro centr	38.7	0	0.03	0.093	9.24	0.08	50.15	0.01	0.36	98.66	9.36773
Average (2)		micro centr	39.67	0	0.03	0.05	9.5	0.07	49.49	0.01	0.39	99.21	9.72165
1	392-im33-1r	micro rim	40.44	0.02	0.008	0.084	12.73	0.17	47.1	0.029	0.17	100.75	13.1658
2	392-im33-2r	micro rim	40.54	0.03	0	0.039	12.84	0.18	46.94	0.044	0.15	100.76	13.3037
Average (2)		micro rim	40.49	0.03	0	0.06	12.79	0.18	47.02	0.04	0.16	100.77	13.2392
1	384-ol-2	macrocryst	41.27	0	0	0.01	7.42	0.08	50.12	0.005	0.4	99.3	7.66822
2	384-ol-3	macrocryst	41.48	0	0.06	0	7.09	0.09	51.47	0.016	0.36	100.57	7.17324
3	384-ol-4	macrocryst	40.63	0	0.01	0	7.06	0.08	52.17	0	0.34	100.29	7.05595
Average (3)			41.13	0	0.02	0	7.19	0.08	51.25	0.01	0.37	100.05	7.29598
1	384-im15-1c	micro centr	41.15	0	0	0	7.04	0.08	51.43	0	0.39	100.09	7.13141
2	384-im15-2c	micro centr	40.82	0	0.01	0.017	8.29	0.12	50.79	0	0.36	100.41	8.38836
3	384-im15-3c	micro centr	40.55	0	0.036	0	8.23	0.13	51.21	0.02	0.35	100.53	8.27002
4	384-im15-4c	micro centr	41.24	0	0.003	0.011	8.54	0.13	50.14	0	0.36	100.42	8.72152
5	384-im15-8c	micro centr	40.99	0	0.016	0.001	7.51	0.09	51.72	0.021	0.38	100.73	7.53221
Average (5)		micro centr	40.95	0	0.01	0.006	7.92	0.11	51.06	0.008	0.37	100.43	8.00496
1	384-im15-1r	micro rim	40.26	0.03	0.03	0.19	12.39	0.19	46.77	0.08	0.17	100.11	12.9384
2	384-im15-2r	micro rim	39.35	0.019	0.008	0.055	12.76	0.2	47.27	0.12	0.12	99.9	13.1516
3	384-im15-3r	micro rim	39.87	0.037	0.02	0.03	12.56	0.19	46.65	0.21	0.12	99.69	13.1219
4	384-im15-4r	micro rim	39.43	0.022	0.032	0.115	13.83	0.15	47.13	0.095	0.26	101.06	14.1349
5	384-im15-8r	micro rim	38.72	0.01	0.04	0.09	12.75	0.17	48.27	0.07	0.18	100.3	12.9055
Average (5)		micro rim	39.53	0.02	0.03	0.1	12.86	0.18	47.22	0.12	0.17	100.23	13.2531
fe#= Fe/(Mg+Fe)x100
