# Supplementary material
Source: MDPI journal article supplement (https://www.mdpi.com/2075-163X/13/11/1404)
Supplement: s1 [file s1 › Table s3. Compositions of macrocryst garnets from Obnazhennaya kimberlites.xls]

## Sheet: Лист1
Table s3. Compositions of macrocryst garnets from Obnazhennaya kimberlites, wt%.
No,	SiO2	TiO2	Al2O3	Cr2O3	FeO	MnO	MgO	CaO	Total
1	42.445	0.128	22.247	1.938	7.781	0.328	20.747	4.889	100.503
2	41.954	0.173	22.761	1.388	9.595	0.425	19.731	4.854	100.881
3	41.765	0.214	21.971	2.169	9.256	0.388	20.211	4.275	100.249
4	42.413	0.155	21.427	2.665	8.765	0.425	19.583	5.026	100.459
5	42.135	0.145	22.343	1.839	8.304	0.34	20.298	4.946	100.35
6	42.075	0.001	21.504	2.821	7.893	0.396	19.941	5.514	100.145
7	43.248	0.143	22.381	1.552	6.893	0.285	21.648	4.197	100.347
8	42.505	0.088	22.062	2.407	7.681	0.417	20.656	5.236	101.052
9	42.353	0.043	20.621	3.386	8.762	0.469	19.542	5.22	100.396
10	42.427	0.119	21.708	2.052	8.02	0.385	20.393	4.977	100.081
11	42.581	0.16	21.89	2.061	8.477	0.411	19.932	4.799	100.311
12	42.349	0.157	21.647	2.547	8.559	0.393	19.74	4.972	100.364
13	42.247	0.142	21.783	2.569	7.651	0.403	20.443	5.081	100.319
14	42.673	0.114	21.734	2.264	7.639	0.422	20.38	5.02	100.246
15	42.475	0.138	20.606	3.623	8.192	0.446	19.604	5.299	100.383
16	41.969	0.111	22.019	2.333	7.807	0.437	20.257	5.139	100.072
17	42.281	0.138	21.858	2.391	8.339	0.406	20.294	5.125	100.832
18	42.238	0.173	21.768	2.422	8.245	0.411	20.324	4.822	100.403
19	42.5	0.149	22.012	2.263	7.972	0.431	20.236	5.073	100.636
20	42.608	0.164	21.644	2.535	8.243	0.402	20.312	4.97	100.878
21	42.085	0.118	21.941	2.119	7.439	0.373	20.478	5.067	99.62
22	42.126	0.067	21.893	2.255	7.619	0.412	20.566	5.135	100.073
23	42.495	0.124	21.577	2.455	7.827	0.404	20.283	5.066	100.231
24	42.272	0.123	21.116	2.709	8.098	0.426	20.181	5.318	100.243
25	42.897	0.051	21.337	2.44	7.712	0.343	20.129	5.264	100.173
26	42.351	0.101	22.34	2.116	7.877	0.364	20.486	5.028	100.663
27	42.281	0.112	22.043	2.637	8.238	0.436	19.924	5.436	101.107
28	42.463	0.148	22.01	2.326	8.304	0.417	20.533	4.834	101.035
29	42.021	0.057	22.677	0.245	15.378	0.384	16.555	3.781	101.098
30	42.822	0.131	21.881	2.426	7.629	0.414	20.357	5.248	100.908
31	41.055	0.057	22.708	0.245	18.251	0.38	14.358	4.34	101.394
32	42.355	0.152	21.85	2.376	8.341	0.411	20.13	5.086	100.701
33	42.608	0.109	22.822	1.36	7.941	0.343	20.608	4.688	100.479
34	42.327	0.112	21.896	2.201	8.309	0.381	19.794	4.953	99.973
35	42.221	0.076	22.515	1.51	7.239	0.29	21.038	5.022	99.911
36	41.255	0.065	21.861	2.521	8.007	0.366	20.142	5.239	99.456
37	41.209	0.141	21.474	2.983	8.1	0.444	19.915	5.229	99.495
38	42.361	0.139	23.117	1.264	6.475	0.249	21.597	4.985	100.187
39	42.39	0.066	23.216	0.928	8.328	0.49	22.116	2.849	100.383
40	41.834	0.121	21.377	3.179	7.799	0.42	20.018	5.423	100.171
41	41.904	0.125	22.016	2.225	8.526	0.39	19.945	4.81	99.941
42	42.104	0.087	21.893	2.533	7.29	0.368	20.218	5.285	99.778
43	42.371	0.122	21.714	2.563	8.172	0.388	20.041	5.309	100.68
44	42.23	0.038	21.852	2.333	7.509	0.404	20.061	5.47	99.897
45	41.329	0.109	21.541	2.876	7.821	0.399	19.796	5.705	99.576
46	42.29	0.075	22.421	2.097	7.921	0.439	20.764	5.031	101.038
47	42.649	0.132	22.066	2.282	8.098	0.442	20.528	5.046	101.243
48	42.843	0.147	22.013	2.409	7.99	0.471	20.529	5.002	101.404
49	42.039	0.108	22.147	2.457	7.7	0.382	20.45	5.235	100.518
50	42.729	0.134	22.17	2.514	7.209	0.356	20.855	4.984	100.951
51	41.931	0.108	22.27	2.185	8.242	0.457	20.458	4.709	100.36
52	42.278	0.146	21.592	2.655	7.695	0.44	20.014	5.349	100.169
53	42.031	0.079	21.52	2.933	8.219	0.428	19.858	5.465	100.533
54	42.803	0.068	22.492	1.746	8.173	0.374	20.639	4.825	101.12
55	41.813	0.127	21.634	2.824	8.29	0.423	19.818	5.377	100.306
56	41.988	0.135	21.641	2.661	8.246	0.437	19.979	5.08	100.167
57	42.228	0.123	22.209	2.236	7.95	0.422	20.287	5.132	100.587
58	42.327	0.084	21.81	2.298	8.519	0.444	20.093	5.026	100.601
59	42.546	0.131	21.55	2.578	8.137	0.435	20.281	5.388	101.046
60	42.17	0.134	20.884	3.272	7.592	0.358	20.316	5.346	100.072
61	42.436	0.051	22.73	1.356	9.191	0.426	19.567	5.305	101.062
62	42.44	0.119	21.868	2.619	7.746	0.385	20.615	4.987	100.779
63	42.518	0.086	22.13	2.308	8.19	0.411	20.583	4.981	101.207
64	42.573	0.125	21.961	2.139	8.679	0.425	20.058	5.183	101.143
65	41.821	0.027	21.738	2.625	7.397	0.351	20.034	5.596	99.589
66	41.639	0.085	20.591	3.774	8.298	0.412	19.02	5.709	99.528
67	42.857	0.033	22.032	2.374	7.371	0.325	20.486	5.115	100.593
68	41	0.071	22.367	0.379	18.435	0.416	14.015	4.321	101.004
69	42.263	0.129	21.837	2.125	7.691	0.4	20.231	5.036	99.712
70	42.268	0.079	21.84	2.833	7.767	0.384	19.884	5.703	100.758
71	41.941	0.079	21.687	2.591	7.987	0.376	19.701	5.655	100.017
72	42.055	0.117	22.077	2.204	8.028	0.411	20.197	5.136	100.225
73	41.913	0.12	21.73	2.428	8.084	0.43	20.184	5.119	100.008
74	42.974	0.11	22.506	1.903	6.571	0.231	21.491	5.028	100.814
75	42.266	0.152	22.041	2.391	7.723	0.355	20.755	5.088	100.771
76	42.892	0.055	22.302	2.048	7.359	0.376	20.937	4.828	100.797
77	42.105	0	21.635	2.7	7.883	0.351	20.297	5.487	100.458
78	41.846	0.126	21.622	2.572	8.09	0.421	19.888	5.565	100.13
79	42.167	0.114	21.434	2.747	7.711	0.405	20.046	5.408	100.032
80	42.182	0.032	21.656	2.73	7.766	0.364	19.946	5.562	100.238
81	41.89	0.125	21.506	2.623	7.741	0.416	20.067	5.274	99.642
82	42.692	0.097	22.282	2.268	7.438	0.358	20.924	5.026	101.085
83	42.534	0.161	21.102	3.033	7.979	0.461	19.725	5.503	100.498
84	41.746	0.027	21.421	3.053	7.955	0.394	20.094	5.482	100.172
85	41.33	0.16	21.943	2.421	7.724	0.414	20.015	5.258	99.265
86	41.465	0.148	21.522	2.585	7.639	0.405	20.634	5.052	99.45
87	41.695	0.156	22.063	2.226	7.323	0.382	21.313	4.439	99.597
88	41.27	0.076	22.012	1.743	7.933	0.349	20.572	5.026	98.981
89	42.439	0.088	21.587	2.575	7.896	0.379	20.235	5.18	100.379
90	41.698	0.101	22.053	2.424	8.37	0.406	20.4	5.101	100.553
91	42.251	0.142	22.045	2.042	8.532	0.382	20.42	4.859	100.673
92	42.112	0.07	22.241	2.14	8.41	0.415	20.269	5.025	100.682
93	42.219	0.229	20.494	3.619	8.676	0.432	19.512	5.373	100.554
94	40.837	0.052	21.542	2.73	7.827	0.377	20.083	5.392	98.84
95	42.112	0.072	21.931	2.115	7.983	0.41	20.452	5.138	100.213
96	42.642	0.085	21.854	2.232	7.362	0.371	20.726	4.989	100.261
97	42.932	0.084	22.355	2.007	7.164	0.271	21.132	5.047	100.992
98	42.543	0.102	22.06	2.18	7.96	0.415	20.723	4.787	100.77
99	42.162	0.109	21.607	2.837	8.255	0.391	19.916	5.336	100.613
100	42.91	0.149	21.302	2.699	8.27	0.381	19.96	5.274	100.945
101	42.145	0.138	21.542	2.259	7.857	0.417	20.445	5.077	99.88
102	41.867	0.131	21.538	2.247	8.165	0.381	20.224	4.882	99.435
103	41.959	0.18	20.458	3.243	7.984	0.418	20.073	5.483	99.798
104	41.795	0.091	21.68	2.533	7.834	0.42	20.175	5.26	99.788
105	42.301	0.134	21.812	2.485	7.684	0.37	20.781	5.045	100.612
106	42.478	0.022	20.821	3.316	9.048	0.522	19.344	5.141	100.692
107	42.309	0.141	20.24	3.768	7.691	0.434	20.173	5.359	100.115
108	42.441	0.126	21.617	2.104	9.012	0.415	19.921	5.05	100.686
109	42.591	0.117	21.441	2.924	7.918	0.451	19.978	5.529	100.949
110	42.64	0.122	21.826	2.141	7.96	0.377	20.139	5.115	100.32
111	42.331	0.117	22.003	2.344	7.491	0.414	20.54	5.033	100.273
112	42.155	0.085	21.828	2.326	7.838	0.372	20.383	5.151	100.138
113	42.075	0.097	21.799	2.704	8.254	0.408	20.18	5.103	100.62
114	41.557	0.119	21.964	2.436	7.827	0.397	20.348	5.152	99.8
115	42.259	0.127	21.724	2.558	7.889	0.413	20.377	5.091	100.438
116	41.646	0.072	20.951	3.195	9.009	0.503	19.109	5.543	100.028
117	42.767	0.104	22.709	1.571	8.031	0.324	20.604	4.951	101.061
118	42.116	0.119	22.314	1.274	10.251	0.428	19.292	4.713	100.507
119	41.442	0.028	21.149	3.013	8.691	0.417	19.301	5.611	99.652
120	42.322	0.151	21.669	2.14	7.972	0.37	20.211	5.181	100.016
121	42.642	0.092	22.014	2.074	8.029	0.441	20.516	4.83	100.638
122	42.281	0.054	21.235	2.928	7.946	0.373	20.088	5.533	100.438
123	42.172	0.1	22.058	2.008	8.001	0.435	20.64	4.85	100.264
124	41.875	0.078	21.349	2.803	7.956	0.396	19.813	5.555	99.825
125	42.317	0.176	22.428	1.438	10.144	0.402	19.488	4.759	101.152
126	42.15	0.136	21.571	2.569	8.559	0.435	19.557	5.281	100.258
127	41.99	0.11	21.767	2.39	7.834	0.411	20.254	5.084	99.84
128	42.059	0.099	21.862	2.655	8.209	0.423	20.086	5.408	100.801
129	42.778	0.135	22.996	1.165	6.34	0.23	21.67	4.981	100.295
130	42.171	0.127	21.838	2.523	7.673	0.396	20.387	4.979	100.094
131	41.929	0.174	20.68	3.788	7.597	0.409	20.58	4.902	100.059
132	42.28	0.108	21.421	2.825	8.249	0.429	19.954	5.319	100.585
133	42.108	0.046	20.446	3.571	9.03	0.492	19.206	5.581	100.48
134	40.574	0.128	22.257	0.192	19.381	0.375	14.403	3.706	101.016
135	42.924	0.14	20.759	3.714	8.399	0.414	20.001	4.951	101.302
136	41.749	0.148	21.299	2.639	8.24	0.403	20.072	5.153	99.703
137	41.334	0.036	21.592	1.691	14.849	0.536	15.625	5.525	101.188
138	42.443	0.083	21.83	2.498	7.683	0.421	20.453	5.089	100.5
139	42.545	0.098	21.965	2.162	7.473	0.4	20.384	5.171	100.198
140	42.629	0.113	21.537	2.937	8.136	0.452	19.822	5.473	101.099
141	41.986	0.086	21.671	2.72	9.096	0.446	19.704	4.997	100.706
142	42.449	0.131	21.741	2.198	8.289	0.409	20.005	5.035	100.257
143	42.089	0.121	21.463	2.794	8.204	0.381	19.878	5.264	100.194
144	42.763	0.072	22.315	1.526	9.763	0.473	20.248	3.921	101.081
145	42.008	0.085	21.463	2.656	8.375	0.429	20.203	5.054	100.273
146	42.005	0.135	21.427	2.57	7.871	0.402	20.198	5.23	99.838
147	42.182	0.055	21.898	2.297	7.534	0.37	20.483	5.059	99.878
148	42.822	0.149	22.519	1.703	6.525	0.273	21.407	5.066	100.464
149	41.781	0.061	21.951	2.543	6.721	0.279	21.173	5.201	99.71
150	42.597	0.089	21.953	2.393	6.932	0.265	20.992	5.245	100.466
151	42.318	0.122	23.365	0.532	8.715	0.332	20.548	4.5	100.432
152	42.439	0.764	21.787	0.226	11.845	0.411	19.145	4.475	101.092
153	42.337	0.082	21.546	2.458	7.408	0.39	19.895	5.623	99.739
154	40.648	0.03	22.732	0.255	18.515	0.395	14.248	4.251	101.074
155	41.91	0.366	18.913	5.126	8.173	0.379	19.854	5.34	100.061
156	42.723	0.109	21.756	2.531	7.77	0.394	20.445	5.428	101.156
157	41.877	0.081	21.99	2.457	7.902	0.45	20.332	5.002	100.091
158	42.074	0.079	21.901	2.176	7.793	0.458	20.088	5.009	99.578
159	41.809	0.095	21.843	2.291	7.798	0.412	20.653	4.824	99.725
160	41.495	0.144	21.586	2.51	7.804	0.378	20.511	4.981	99.409
161	42.479	0.127	21.961	2.351	8.172	0.395	20.646	4.773	100.904
162	42.021	0.597	21.941	0.165	12.678	0.435	17.688	5.733	101.258
163	40.997	0.072	22.753	0.114	17.087	0.39	15.744	3.727	100.884
164	41.407	0.144	21.683	2.366	8.256	0.446	19.928	5.184	99.414
165	42.176	0.076	21.478	2.54	7.702	0.374	20.075	5.602	100.023
166	42.291	0.156	21.4	2.954	8.132	0.408	20.041	5.323	100.705
167	42.233	0.131	21.602	2.685	7.84	0.417	20.282	5.332	100.522
168	42.216	0.105	22.031	2.149	8.177	0.365	20.293	5.098	100.434
169	42.291	0.033	22.001	2.285	7.349	0.374	20.631	4.998	99.962
170	42.141	0.061	19.955	4.618	8.018	0.515	19.593	5.43	100.331
171	42.689	0.156	22.257	1.924	8.692	0.428	20.109	4.699	100.954
172	42.458	0.007	20.913	3.863	7.61	0.469	20.124	5.143	100.587
173	41.292	0.143	21.429	2.662	8.326	0.438	19.718	5.312	99.32
174	42.255	0.14	22.467	1.722	8.007	0.371	20.636	4.655	100.253
175	42.815	0.071	21.707	2.296	7.493	0.376	20.244	5.147	100.149
176	41.823	0.149	22.906	0.428	13.569	0.388	17.524	4.621	101.408
177	42.225	0.086	20.742	3.948	7.82	0.434	19.548	5.535	100.338
178	42.452	0.16	21.52	2.373	8.69	0.43	19.787	4.952	100.364
179	41.621	0.147	21.988	2.23	8.189	0.417	20.222	5.124	99.938
180	42.201	0.109	21.913	2.369	7.851	0.412	20.196	5.093	100.144
181	42.464	0.116	22.979	0.415	11.869	0.281	19.32	3.709	101.153
182	42.678	0.13	21.774	2.398	7.68	0.368	20.623	4.797	100.448
183	42.499	0.122	22.818	1.145	9.39	0.406	19.948	4.54	100.868
