# Supplementary material
Source: MDPI journal article supplement (https://www.mdpi.com/2075-163X/13/11/1404)
Supplement: s1 [file s1 › Table s4. Compositions of Mg-ilmenite from Obnazhennaya.xls]

## Sheet: Лист1
Table s4. Compositions of Mg-ilmenite from Obnazhennaya kimberlites, wt%.
№	Description	TiO2	Al2O3	Cr2O3	Fe2O3	FeO	MnO	MgO	Total	mg#
1	macrocryst	40.11	0.202	2.249	25.0498	27.5679	0.187	4.662	100.028	14.2214
2	macrocryst	41.428	0.162	1.097	23.8195	28.6339	0.192	4.726	100.058	14.3987
3	macrocryst	41.533	0.116	1.286	23.2146	28.9262	0.192	4.615	99.8828	14.1694
4	macrocryst	42.78	0.189	1.881	21.0657	28.4018	0.21	5.528	100.055	17.2192
5	macrocryst	42.865	0.121	1.852	20.4488	28.9389	0.211	5.269	99.7057	16.5512
6	macrocryst	44.373	0.133	1.525	18.6251	29.3849	0.284	5.738	100.063	18.1393
7	macrocryst	45.313	0.134	0.873	16.7451	29.9386	0.278	5.905	99.1867	18.9498
8	macrocryst	45.342	0.144	0.811	17.1469	29.777	0.319	5.987	99.5269	19.0939
9	macrocryst	46.727	0.161	1.292	14.1428	29.8251	0.248	6.699	99.0949	21.9082
10	macrocryst	47.012	0.168	1.225	14.9233	30.1178	0.293	6.653	100.392	21.3992
11	macrocryst	50.479	0.581	0.1	10.3633	29.914	0.23	8.552	100.219	27.9734
12	macrocryst	51.846	0.349	1.34	7.458	29.9702	0.29	9.176	100.429	30.8329
mg#=Mg/(Mg+Fe3)
