# Supplementary material
Source: MDPI journal article supplement (https://www.mdpi.com/2075-163X/13/11/1404)
Supplement: s1 [file s1 › Table s5. Compositions of spinels from Obnazhennaya.xlsx]

## Sheet: Лист1
Table s5. Compositions of spinel macrocrysts from Obnazhennaya kimberlites, wt%.
№	1	2	3	4	5	6	7	8
SiO2	0.02	0.06	0.04	0.06	0.02	0.02	0.03	0
TiO2	0.15	0.2	0.19	0.13	0.03	0.08	0.02	0.19
Al2O3	20.88	32.05	45.6	21.11	32.08	35.99	24.61	29.34
Cr2O3	49.43	35.87	23.34	49.37	37.24	33.97	42.74	40.98
FeO	15.51	15.74	11.45	17.57	13.06	12.39	17.72	13.17
MnO	0.29	0.23	0.16	0.31	0.21	0.18	0.21	0.21
MgO	13.41	15.55	18.45	11.27	16.53	16.64	13.73	15.47
Total	99.69	99.68	99.23	99.83	99.17	99.26	99.06	99.36
№	9	10	11	12	13	14	15	16
SiO2	0.02	0	0.03	0.05	0	0	0.03	0.01
TiO2	0.83	0.24	0.14	0.12	0.27	0.12	0	0.17
Al2O3	14.97	24.46	44.46	45.37	34.86	42.19	46.61	41.78
Cr2O3	51.66	44.4	22.13	20.83	34.75	27.18	22.14	26.64
FeO	18.38	14.61	13.15	10.81	11.61	12.02	10.98	11.76
MnO	0.24	0.23	0.15	0.15	0.16	0.17	0.14	0.14
MgO	12.97	14.65	18.61	18.65	17.06	17.16	18.98	17.67
Total	99.08	98.59	98.67	95.99	98.72	98.84	98.87	98.16
№	17	18	19	20	21	22	23	24
SiO2	0.03	0	0.02	0.03	0.01	0.01	0.03	0.03
TiO2	0.2	0.11	0.08	0.04	0.13	0.26	0.24	0.22
Al2O3	46.08	21.06	38.41	28.67	44.64	36.67	39.54	33.3
Cr2O3	23.06	49.43	30.38	39.36	23.4	31.61	28.7	35.09
FeO	11.2	15.65	11.53	15.64	11.07	13.47	13.49	14.28
MnO	0.13	0.25	0.18	0.24	0.18	0.15	0.15	0.2
MgO	17.81	12.98	17.98	14.93	18.19	16.74	16.84	15.86
Total	98.51	99.48	98.56	98.92	97.62	98.9	98.99	98.98
№	25	26	27	28	29	30	31	32
SiO2	0.11	0	0	0.02	0	0.02	0	0
TiO2	0.08	0.17	0.15	0.47	0.46	0.13	0.08	0.29
Al2O3	30.6	32.03	41.95	16.44	32.35	43.27	19.17	37.38
Cr2O3	38.66	35.82	26.64	49.55	36.14	25.27	51.61	30.91
FeO	13.97	15.34	11.84	20.21	13.59	11.55	15.49	12.4
MnO	0.21	0.22	0.19	0.26	0.18	0.16	0.29	0.16
MgO	15	15.6	18.03	12.69	16.23	17.9	12.96	16.57
Total	98.64	99.17	98.81	99.64	98.93	98.31	99.6	97.71
№	33	34	35	36	37	38	39	40
SiO2	0.05	0.05	0.06	0.01	0.04	0	0.01	0.03
TiO2	0.19	0.19	0	0.13	0.46	0.03	0.09	0.18
Al2O3	46.82	47.31	31.59	44.38	32.24	48.85	28.43	42.22
Cr2O3	20.56	21	38.14	24.35	36.96	19.37	35.67	26.56
FeO	11.07	10.81	13.58	10.86	12.52	12	21.89	11.27
MnO	0.15	0.13	0.23	0.13	0.15	0.13	0.26	0.14
MgO	18.4	18.59	14.84	18.18	16.51	17.94	12.63	17.66
Total	97.23	98.09	98.42	98.03	98.88	98.32	98.99	98.06
№	41	42	43	44	45	46	47	48
SiO2	0.03	0.03	0.02	0	0.01	0	0.06	0
TiO2	0.34	0.06	0.47	0.17	0.12	0.05	0.15	0.11
Al2O3	25.17	26.48	26.22	41.68	45.04	32.84	36.61	38.55
Cr2O3	37.19	43.88	40.97	26.92	22.17	36.81	30.32	30.52
FeO	23.18	13.46	16.66	11.55	11.44	13.9	15.07	12.06
MnO	0.41	0.21	0.27	0.15	0.14	0.22	0.18	0.16
MgO	12.55	14.51	14.45	18.19	18.42	15.39	16.42	17.05
Total	98.85	98.64	99.06	98.68	97.35	99.19	98.8	98.44
№	49	50	51	52	53	54	55	56
SiO2	0.02	0.02	0.02	0.02	0.03	0	0.04	0
TiO2	0.19	0.21	0.27	0.22	0.04	0.19	0.09	0.42
Al2O3	39.95	44.29	31.73	38.85	27.88	48.7	27.1	32.64
Cr2O3	28.63	23.69	36.05	27.96	42.59	19.29	42.01	36.21
FeO	11.63	11.19	13.54	12.36	13.67	10.75	14.15	12.53
MnO	0.16	0.13	0.18	0.16	0.22	0.11	0.19	0.17
MgO	17.62	18.07	16.47	17.28	14.49	19	15.43	16.6
Total	98.19	97.6	98.25	96.87	98.92	98.04	99.02	98.56
