# Supplementary material
Source: MDPI journal article supplement (https://www.mdpi.com/2075-163X/13/11/1404)
Supplement: s1 [file s1 › Table s6. Compositions of Cpx from Obnazhennaya kimberlites.xlsx]

## Sheet: Лист1
Table s6. Compositions of Cpx from Obnazhennaya kimberlites, wt%.
N	Discription	SiO2	TiO2	Al2O3	Cr2O3	FeO	MnO	MgO	CaO	Na2O	total	ca#	mg#
1	Macrocryst	53.87	0.73	7.75	1.42	1.44	0.06	12.75	17.9	3.69	99.61	50.2567	94.0426
2	Macrocryst	54.95	0.146	6.35	0.178	3.05	0.046	12.76	17.95	3.57	99	50.3069	88.1781
3	Macrocryst	54.67	0.594	6.36	0.219	2.97	0.056	12.96	17.74	3.64	99.209	49.6239	88.6103
4	Macrocryst	54.53	0.585	6.27	0.203	2.88	0.023	13.03	17.95	3.63	99.101	49.7834	88.9701
5	Macrocryst	53.8	0.468	7.02	1.87	1.38	0.028	13.04	18.29	3.47	99.366	50.2333	94.3968
6	Macrocryst	54.46	0.136	6.28	0.186	3.04	0.043	13.06	17.81	3.56	98.575	49.5302	88.4518
7	Macrocryst	53.5	0.464	6.94	1.85	1.39	0.042	13.1	18.38	3.46	99.126	50.2413	94.3829
8	Macrocryst	54.54	0.61	6.96	0.319	2.21	0.061	13.12	17.99	3.6	99.41	49.667	91.3676
9	Macrocryst	53.7245	0.533673	6.61224	1.82653	1.42857	0.0520408	13.3061	18.602	3.47959	99.5653	50.1512	94.3202
10	Macrocryst	55.05	0.396	4.58	3.16	1.74	0.065	13.66	17.7	3.56	99.911	48.253	93.3318
11	Macrocryst	54.53	0.6	5.34	1.96	1.79	0.059	13.66	19.03	2.96	99.929	50.0636	93.1533
12	Macrocryst	54.23	0.33	4.52	0.488	3.85	0.053	13.69	18.74	3.07	98.971	49.6249	86.3753
13	Macrocryst	53.86	0.542	5.16	1.94	1.69	0.075	13.77	18.99	2.87	98.897	49.8105	93.5595
14	Macrocryst	53.58	0.467	5.61	1.3	1.41	0.048	13.79	20.24	2.23	98.675	51.3676	94.5761
15	Macrocryst	53.66	0.487	5.68	0.531	2.71	0.111	13.85	19.92	2.31	99.259	50.8609	90.1105
16	Macrocryst	53.93	0.563	5.44	1.72	1.62	0.074	13.9	19.22	2.7	99.167	49.8766	93.8641
17	Macrocryst	53.4	0.479	5.74	0.537	2.79	0.092	13.94	19.77	2.37	99.118	50.5101	89.9071
18	Macrocryst	53.92	0.639	5.31	1.88	1.5	0.068	13.95	19.36	2.77	99.397	49.9682	94.312
19	Macrocryst	53.95	0.344	5.03	2.1	1.35	0.057	14.02	19.52	2.69	99.061	50.0489	94.8759
20	Macrocryst	53.4	0.899	6.13	1.44	1.39	0.055	14.05	19.46	2.65	99.474	49.9185	94.7427
21	Macrocryst	53.15	0.528	5.74	1.52	1.41	0.053	14.06	20.03	2.44	98.931	50.6224	94.6747
22	Macrocryst	54	0.338	5.4	1.96	1.44	0.066	14.08	19.77	2.69	99.744	50.2602	94.5748
23	Macrocryst	53.44	0.501	5.7	1.34	1.33	0.055	14.14	20.2	2.28	98.986	50.6918	94.9887
24	Macrocryst	53.46	0.576	5.63	1.57	1.3	0.062	14.16	20.22	2.42	99.398	50.6812	95.1028
25	Macrocryst	53.46	0.513	5.94	1.5	1.43	0.063	14.16	19.98	2.38	99.426	50.3828	94.6393
26	Macrocryst	53.7	0.571	5.54	1.58	1.31	0.059	14.21	20.31	2.38	99.66	50.7041	95.0835
27	Macrocryst	53.05	0.474	5.79	1.31	1.37	0.063	14.25	20.17	2.41	98.887	50.461	94.8835
28	Macrocryst	54.27	0.297	5.08	1.88	1.62	0.075	14.26	19.78	2.58	99.842	49.9553	94.0097
29	Macrocryst	54.29	0.318	5.09	1.87	1.54	0.061	14.27	19.77	2.64	99.849	49.9251	94.2924
30	Macrocryst	53.31	0.564	5.72	1.43	1.61	0.075	14.28	20.21	2.43	99.629	50.4579	94.0523
31	Macrocryst	52.77	0.5	5.7	1.45	1.43	0.054	14.37	20.07	2.43	98.774	50.1271	94.7135
32	Macrocryst	54.6531	0.218367	5.41837	1.03061	1.65306	0.0469388	14.4184	19.4592	3.09184	99.9898	49.2705	93.9579
33	Macrocryst	54.02	0.568	5.5	0.88	1.44	0.061	14.47	20.44	2.36	99.739	50.4104	94.7133
34	Macrocryst	54.69	0.375	4.08	2.4	1.82	0.082	14.48	18.76	2.98	99.667	48.2497	93.4144
35	Macrocryst	53.2371	0.209278	3.35052	2.72165	2.36082	0.0670103	14.4845	19.5773	2.84536	98.8536	49.3073	91.6238
36	Macrocryst	54.41	0.222	4.02	2.44	2.46	0.061	14.52	18.44	2.99	99.563	47.7514	91.322
37	Macrocryst	53.14	0.581	5.23	1.46	1.33	0.051	14.53	20.35	2.29	98.962	50.1966	95.1166
38	Macrocryst	54.07	0.524	4.97	1.24	1.4	0.054	14.55	20.58	2.15	99.538	50.4432	94.8795
39	Macrocryst	53.6633	0.577551	5.13265	2.09184	1.70408	0.0816327	14.6122	19.2143	3.10204	100.18	48.6202	93.8605
40	Macrocryst	54.19	0.368	4.06	2.45	1.78	0.061	14.63	18.71	2.93	99.179	47.9258	93.6117
41	Macrocryst	53.17	0.539	5.08	0.961	1.51	0.061	14.64	20.46	2.09	98.511	50.1429	94.5312
42	Macrocryst	53.29	0.484	4.89	1.85	1.55	0.056	14.67	19.58	2.51	98.88	48.9927	94.4053
43	Macrocryst	52.93	0.336	5.42	1.86	1.42	0.075	14.69	19.1	2.67	98.501	48.3386	94.857
44	Macrocryst	54.03	0.342	5.02	1.43	1.28	0.051	14.71	20.53	2.15	99.543	50.109	95.3465
45	Macrocryst	53.75	0.34	5.23	1.64	1.33	0.064	14.73	20.26	2.27	99.614	49.7441	95.1797
46	Macrocryst	53.28	0.181	5.21	1.18	1.79	0.082	14.75	21.61	1.51	99.593	51.3225	93.627
47	Macrocryst	54.8163	0.389796	3.2551	0.967347	2.19388	0.0755102	14.7857	21.4694	2.20408	100.157	51.099	92.317
48	Macrocryst	53.01	0.167	5.51	1.14	1.74	0.1	14.79	21.72	1.48	99.657	51.3817	93.8098
49	Macrocryst	53.54	0.506	4.97	1.22	1.45	0.056	14.8	20.23	2.29	99.062	49.5885	94.791
50	Macrocryst	53.36	0.503	4.95	1.25	1.39	0.061	14.81	20.12	2.29	98.734	49.4353	94.999
51	Macrocryst	53.38	0.344	4.57	1.44	1.18	0.058	14.84	20.78	1.98	98.572	50.1916	95.7305
52	Macrocryst	52.63	0.179	5.38	1.18	1.78	0.068	14.84	21.62	1.46	99.137	51.1821	93.6964
53	Macrocryst	53.46	0.354	4.39	2.05	1.74	0.065	14.88	19.3	2.61	98.849	48.2779	93.8449
54	Macrocryst	53.48	0.642	4.07	2.02	1.46	0.058	14.88	20.35	2.15	99.11	49.6016	94.7837
55	Macrocryst	54.42	0.547	5.05	0.879	1.47	0.05	14.91	20.83	2.18	100.336	50.134	94.7599
56	Macrocryst	54.35	0.267	3.5	1.87	1.7	0.049	14.98	20.96	2.04	99.716	50.1725	94.0157
57	Macrocryst	54.18	0.249	3.07	2	2.64	0.091	15	19.64	2.59	99.46	48.5134	91.0153
58	Macrocryst	53.93	0.235	4.4	1.62	1.35	0.079	15	21.01	1.91	99.534	50.1987	95.1946
59	Macrocryst	52.75	0.167	5.4	1.22	1.79	0.078	15.01	21.71	1.46	99.585	51.0013	93.7305
60	Macrocryst	52.97	0.21	5.16	1.09	1.58	0.073	15.03	21.89	1.4	99.403	51.1743	94.432
61	Macrocryst	52.94	0.193	5.28	1.12	1.76	0.098	15.03	21.83	1.4	99.651	51.1057	93.8368
62	Macrocryst	53.9	0.237	4.44	1.66	1.46	0.07	15.04	20.97	1.99	99.767	50.0845	94.8363
63	Macrocryst	54.9	0.554	5.25	1.5	1.29	0.042	15.05	20.38	2.39	101.356	49.3544	95.4129
64	Macrocryst	53.8	0.241	4.29	1.49	1.42	0.081	15.12	21.27	1.88	99.592	50.307	94.996
65	Macrocryst	54.05	0.365	3.68	1.29	1.52	0.047	15.16	21.08	1.96	99.152	50.0166	94.6757
66	Macrocryst	53.55	0.328	4.46	1.58	1.35	0.069	15.17	21.32	1.7	99.527	50.2831	95.2459
67	Macrocryst	54.94	0.233	1.92	2.25	2.6	0.059	15.17	20.53	2.09	99.792	49.3392	91.2299
68	Macrocryst	53.92	0.331	5	1.3	1.23	0.058	15.17	20.79	2.09	99.889	49.6538	95.6501
69	Macrocryst	55.2	0.325	2.9	1.15	1.61	0.053	15.18	21.43	1.68	99.528	50.3953	94.3852
70	Macrocryst	53.93	0.293	4.15	1.1	1.5	0.099	15.18	21.63	1.68	99.562	50.6275	94.7487
71	Macrocryst	53.41	0.428	3.73	1.94	1.45	0.075	15.19	20	2.34	98.563	48.6527	94.918
72	Macrocryst	53.43	0.338	4.51	1.71	1.36	0.062	15.21	21.58	1.72	99.92	50.5203	95.2243
73	Macrocryst	53.52	0.321	5.09	1.35	1.2	0.056	15.22	20.33	2.12	99.207	49.0123	95.765
74	Macrocryst	53.4184	0.508163	4.5102	1.83673	1.5	0.0755102	15.2245	20.6531	2.21429	99.9408	49.399	94.7632
75	Macrocryst	53.5816	0.027551	4.34694	1.59184	1.55102	0.113265	15.2449	22.898	0.963265	100.318	51.9441	94.6015
76	Macrocryst	53.97	0.351	3.94	1.22	1.55	0.042	15.26	20.89	1.95	99.173	49.6259	94.61
77	Macrocryst	53.83	0.322	4.31	1.23	1.35	0.099	15.26	21.53	1.58	99.511	50.3803	95.2726
78	Macrocryst	53.67	0.46	4.08	1.96	1.5	0.069	15.28	20.42	2.37	99.809	49.0244	94.7812
79	Macrocryst	53.27	0.332	4.81	1.51	1.33	0.039	15.3	20.43	2.1	99.121	49.0039	95.351
80	Macrocryst	54.49	0.406	3.82	1.01	1.56	0.063	15.3	20.9	1.94	99.489	49.5724	94.5905
81	Macrocryst	54.12	0.333	3.89	1.71	1.21	0.041	15.3	21.11	2.01	99.724	49.8223	95.7526
82	Macrocryst	54.02	0.284	3.08	1.31	2.29	0.071	15.31	20.07	2.21	98.645	48.5434	92.2598
83	Macrocryst	54.86	0.245	2.14	2.3	2.56	0.086	15.32	20.3	2.13	99.941	48.8118	91.4306
84	Macrocryst	54.98	0.38	3.68	1.02	1.56	0.062	15.34	21.32	1.86	100.202	50.0045	94.6038
85	Macrocryst	54.22	0.361	3.28	1.07	1.61	0.06	15.39	21.28	1.82	99.091	49.8762	94.4575
86	Macrocryst	54.22	0.166	4.02	1.2	1.36	0.071	15.39	21	1.99	99.417	49.5451	95.2775
87	Macrocryst	54.68	0.491	4.47	0.985	1.45	0.061	15.41	20.89	2.07	100.507	49.3814	94.9869
88	Macrocryst	54.53	0.32	2.96	0.349	3.67	0.093	15.46	19.88	2.1	99.362	48.0624	88.2497
89	Macrocryst	53.21	0.291	4.06	1.22	1.56	0.071	15.49	21.2	1.73	98.832	49.6202	94.6533
90	Macrocryst	53.55	0.385	1.73	2.04	2.55	0.124	15.56	21.63	1.58	99.149	50.0094	91.5818
91	Macrocryst	54.45	0.229	2.48	0.312	3.33	0.064	15.57	20.67	1.74	98.845	48.8586	89.289
92	Macrocryst	53.53	0.313	4.03	1.33	1.58	0.081	15.6	21.67	1.48	99.614	49.9914	94.6246
93	Macrocryst	53.11	0.384	3.58	0.89	1.35	0.065	15.62	22.52	1.38	98.899	50.9212	95.3765
94	Macrocryst	54.58	0.042	4.27	1.54	1.62	0.086	15.62	22.52	1.06	101.338	50.9212	94.5026
95	Macrocryst	53.1	0.043	3.97	1.55	1.68	0.081	15.64	22.53	0.95	99.544	50.9003	94.3175
96	Macrocryst	53.25	0.038	4.2	1.58	1.74	0.08	15.68	22.53	0.926	100.024	50.8365	94.1405
97	Macrocryst	53.66	0.034	3.86	1.41	1.55	0.099	15.7	22.68	0.88	99.873	50.9704	94.7531
98	Macrocryst	53.89	0.22	3.57	1.25	1.53	0.083	15.71	21.93	1.47	99.653	50.1139	94.8204
99	Macrocryst	54.09	0.107	1.57	0.324	4.85	0.078	15.72	21.21	1.2	99.149	49.2635	85.248
100	Macrocryst	54.27	0.317	3.03	1.04	1.42	0.043	15.75	21.44	1.72	99.03	49.4855	95.1865
101	Macrocryst	52.27	0.043	4.36	1.62	1.67	0.078	15.77	22.29	0.928	99.029	50.4257	94.3933
102	Macrocryst	54.732	0.325773	3.09278	1.17526	1.39175	0.0453608	15.7732	21.7423	1.80412	100.082	49.7986	95.2843
103	Macrocryst	53.44	0.038	4.04	1.52	1.64	0.088	15.78	22.53	1	100.076	50.6776	94.4918
104	Macrocryst	53.46	0.037	4.14	1.54	1.77	0.101	15.81	22.31	0.906	100.074	50.3848	94.0916
105	Macrocryst	53.69	0.045	4.05	1.46	1.6	0.091	15.83	22.51	0.958	100.234	50.5763	94.635
106	Macrocryst	54.26	0.293	3.01	1.12	1.36	0.045	15.87	21.42	1.76	99.138	49.2724	95.4138
107	Macrocryst	53.49	0.233	4.19	1.41	1.33	0.056	15.87	21.35	1.53	99.459	49.1906	95.5104
108	Macrocryst	52.9	0.035	4.14	1.54	1.56	0.082	15.89	22.1	0.969	99.216	50.0222	94.7809
109	Macrocryst	55.11	0.337	2.99	1.11	1.54	0.043	15.89	21.4	1.73	100.15	49.2176	94.8443
110	Macrocryst	54.8	0.34	3.24	1.04	1.54	0.057	15.9	21.61	1.74	100.267	49.4459	94.8474
111	Macrocryst	53.99	0.213	3.63	1.06	1.48	0.063	15.91	21.8	1.49	99.636	49.6491	95.0411
112	Macrocryst	55.05	0.156	1.99	1.39	2.25	0.088	15.93	21.25	1.64	99.744	48.979	92.6594
113	Macrocryst	54.26	0.308	2.52	1.03	1.75	0.073	15.94	21.51	1.53	98.921	49.2672	94.1994
114	Macrocryst	53.21	0.05	3.82	1.41	1.66	0.089	15.94	22.59	0.866	99.635	50.4919	94.4812
115	Macrocryst	54.34	0.147	2.04	1.32	2.24	0.081	15.95	21.47	1.55	99.138	49.205	92.6981
116	Macrocryst	53.73	0.304	3.68	1.16	1.53	0.066	15.95	22.21	1.53	100.16	50.0521	94.8944
117	Macrocryst	52.73	0.046	4.18	1.51	1.68	0.079	15.99	21.59	0.904	98.709	49.2817	94.4349
118	Macrocryst	53.22	0.26	4.08	0.998	1.41	0.054	16	21.64	1.37	99.032	49.3239	95.29
119	Macrocryst	54.93	0.319	2.76	0.54	1.6	0.045	16.07	21.6	1.53	99.394	49.1685	94.7109
120	Macrocryst	55.3367	0.0530612	1.08163	2.15306	1.70408	0.0510204	16.0918	21.7245	1.64286	99.8388	49.2782	94.3933
121	Macrocryst	53.05	0.041	3.92	1.36	1.71	0.08	16.11	22.33	0.921	99.522	49.9373	94.3809
122	Macrocryst	53.74	0.038	4.13	1.43	1.61	0.084	16.14	22.51	0.957	100.639	50.0915	94.7014
123	Macrocryst	53.61	0.047	3.74	1.37	1.47	0.092	16.19	22.59	0.953	100.062	50.1028	95.1541
124	Macrocryst	53.96	0.143	1.84	1.13	2.35	0.095	16.21	21.44	1.51	98.678	48.766	92.4801
125	Macrocryst	54.95	0.047	1.34	1.35	2.01	0.092	16.22	22.5	1.4	99.909	49.9568	93.5011
126	Macrocryst	55.24	0.048	1.06	2.17	1.64	0.062	16.26	21.55	1.6	99.63	48.8169	94.6457
127	Macrocryst	54.72	0.124	1.09	0.558	3.82	0.076	16.28	22.02	0.829	99.517	49.3254	88.3697
128	Macrocryst	54.5	0.126	1.9	1.17	2.24	0.069	16.31	21.25	1.54	99.105	48.39	92.8477
129	Macrocryst	54.84	0.051	1.4	1.42	2.06	0.093	16.32	22.09	1.47	99.744	49.3434	93.3882
130	Macrocryst	53.64	0.04	3.32	1.1	1.59	0.071	16.35	22.65	0.792	99.553	49.9233	94.8276
131	Macrocryst	53.12	0.019	3.9	1.33	1.82	0.075	16.39	22.39	0.697	99.741	49.5736	94.1369
132	Macrocryst	52.98	0.684	1.1	1.13	2.61	0.105	16.47	23.2	0.85	99.129	50.3403	91.8371
133	Macrocryst	54.6	0.115	2	1.23	1.63	0.044	16.5	22.52	1.29	99.929	49.5511	94.75
134	Macrocryst	51.8	0.03	4.19	1.53	1.6	0.075	16.55	22.29	0.954	99.019	49.2189	94.8564
135	Macrocryst	53.74	0.054	3.33	1.21	1.63	0.086	16.59	22.4	0.799	99.839	49.2816	94.777
136	Macrocryst	54.51	0.051	2.72	1.08	1.63	0.089	16.67	22.55	0.786	100.086	49.3281	94.8007
137	Macrocryst	53.62	0.044	4.03	1.4	1.83	0.093	16.67	21.96	0.88	100.527	48.6656	94.1998
138	Macrocryst	54.44	0.206	1.89	0.901	1.65	0.045	16.69	22.77	0.957	99.549	49.5409	94.7463
139	Macrocryst	54.49	0.085	1.55	1.46	1.3	0.038	16.7	22.58	1.02	99.223	49.3164	95.8164
140	Macrocryst	54.7	0.076	1.52	1.38	1.33	0.044	16.73	22.55	0.989	99.319	49.2383	95.7314
141	Macrocryst	53.04	0.034	3.42	1.24	1.52	0.084	16.76	22.19	0.849	99.137	48.7914	95.1594
142	Macrocryst	54.15	0.114	2.21	0.552	1.32	0.048	16.83	22.56	0.839	98.623	49.1005	95.7862
143	Macrocryst	54.65	0.103	2.57	1.26	1.3	0.037	16.87	22.16	1.19	100.14	48.5942	95.8569
144	Macrocryst	54.27	0.109	2.29	0.542	1.39	0.049	16.93	22.73	0.873	99.183	49.14	95.5977
145	Macrocryst	53.71	0.04	3.01	1.11	1.69	0.096	16.99	22.16	0.756	99.562	48.4171	94.7156
146	Macrocryst	54	0.280412	3.1134	2.14433	2.92784	0.0927835	17.0515	18.0722	2.30928	99.9918	43.2694	91.2153
147	Macrocryst	52.8969	0.0484536	4.5567	1.71134	2.14433	0.106186	17.1031	20.8041	0.91134	100.282	46.6772	93.4298
148	Macrocryst	53.36	0.076	2.01	0.784	1.28	0.058	17.17	23.21	0.61	98.558	49.3105	95.9865
149	Macrocryst	54.4184	0.582653	2.66327	0.706122	4.62245	0.105102	17.2245	17.4592	1.7449	99.5265	42.1781	86.917
150	Macrocryst	54.7	0.048	1.35	0.756	1.23	0.065	17.25	23.76	0.627	99.786	49.7798	96.1544
151	Macrocryst	54.94	0.051	1.34	0.751	1.33	0.066	17.25	23.58	0.661	99.969	49.5897	95.8547
152	Macrocryst	54.05	0.031	2.88	1.13	1.46	0.085	17.33	22.62	0.727	100.313	48.4354	95.4879
153	Macrocryst	53.5	0.043	2.76	0.995	1.46	0.1	17.36	22.5	0.757	99.475	48.2594	95.4953
154	Macrocryst	54.17	0.056	1.34	0.806	1.26	0.067	17.41	23.57	0.616	99.295	49.3483	96.0991
155	Macrocryst	53.45	0.055	3.74	1.17	1.08	0.091	17.42	21.45	1.45	99.906	46.9813	96.6395
156	Macrocryst	55	0.558	2.7	0.698	4.6	0.116	17.54	17.45	1.74	100.402	41.7233	87.1765
157	Macrocryst	55.57	0.104	1.2	0.552	1.73	0.071	17.69	22.66	1.06	100.637	47.9662	94.8
158	Macrocryst	53.43	0.032	3.79	1.38	2.04	0.076	18.19	20.24	0.81	99.988	44.4675	94.0819
159	Macrocryst	54.12	0.044	3.29	1.21	2.24	0.098	19.23	18.53	0.802	99.564	40.9488	93.8672
160	xenolith	54.902	0.242	4.768	0.383	4.142	0.052	13.578	18.845	3.343	100.255	49.9699	85.3897
161	xenolith	54.551	0.218	6.362	0.028	3.526	0.025	13.306	20.243	2.822	0	52.2633	87.0601
162	Cpx-te	54.737	0.709	6.642	0.43	2.205	0.039	13.876	17.953	3.915	100.506	48.2157	91.8164
163	Cpx-te	55.439	0.676	6.812	0.404	2.293	0.045	13.797	18.129	4.15	101.745	48.6019	91.4731
164	Cpx-te	54.914	0.617	7.762	0.393	2.316	0.064	13.015	17.694	4.425	101.2	49.4531	90.9248
165	Cpx-te	54.062	0.444	5.461	0.492	2.745	0.061	14.443	19.969	2.996	100.673	49.8743	90.3668
166	Eclogite	55.568	0.206	5.248	0.023	2.797	0.007	14.053	19.252	3.444	100.598	49.6445	89.9576
167	Eclogite	51.24	0.041	15.654	0.096	0.946	0	9.156	17.665	4.868	99.666	58.1315	94.5223
168	Eclogite	50.404	0.041	17.369	0.085	1.018	0.005	8.637	18.879	4.07	100.508	61.1351	93.799
169	Eclogite	53.509	0.242	9.125	0.182	3.511	0.034	12.116	17.996	3.521	100.236	51.6649	86.0188
170	Eclogite	55.601	0.225	10.258	0.165	2.076	0.022	10.899	16.525	4.814	100.585	52.1787	90.3476
171	Eclogite	55.282	0.15	10.486	0.135	1.912	0	10.987	16.653	5.307	100.912	52.1706	91.1072
172	Eclogite	53.978	0.608	6.16	0.1	4.369	0.08	14.997	18.13	2.416	100.838	46.5236	85.9549
173	Eclogite	55.055	0.203	10.256	0.15	1.927	0.026	10.701	16.657	5.456	100.431	52.8343	90.8262
174	Eclogite	55.681	0.198	10.419	0.132	1.765	0.006	10.682	16.59	5.645	101.118	52.7781	91.5184
175	Dunite	54.441	0.019	3.233	1.412	1.672	0.06	16.493	21.402	1.081	0	48.2894	94.6198
176	Dunite	54.858	0.16	2.757	2.422	2.204	0.041	15.102	19.519	2.785	0	48.1898	92.4337
177	Harz	53.812	0.013	1.573	1.012	1.658	0.08	17.358	23.046	0.731	99.283	48.8612	94.9149
178	Harzb	53.071	0	3.872	1.105	1.966	0.056	16.726	23.302	0.694	100.792	50.0644	93.815
179	Lherz	53.495	0.025	3.264	1.362	1.831	0.092	16.741	22.114	0.831	99.755	48.734	94.22
180	Lherz	53.025	0.017	3.283	1.39	1.771	0.078	16.163	22.691	0.823	99.241	50.2561	94.2101
181	Lherz	53.161	0.109	2.229	1.044	1.601	0.068	18.058	22.753	0.796	99.819	47.5547	95.2628
182	Lherz	53.815	0.439	5.171	1.141	1.392	0.05	14.652	21.068	2.409	100.137	50.8544	94.9409
183	Lherz	53.731	0.386	4.303	1.989	1.502	0.059	15.22	19.612	2.686	99.488	48.1142	94.7551
184	Lherz	54.05	0.584	4.119	2.075	1.453	0.065	14.442	20.199	2.64	99.627	50.1623	94.6583
185	Lherz	54.425	0.247	3.655	2.127	1.729	0.048	14.377	20.11	2.79	99.508	50.1647	93.6809
186	Lherz	55.133	0.357	6.018	2.033	1.471	0.042	13.117	19.234	3.038	100.443	51.3439	94.0822
187	Lherz	54.631	0.224	4.942	1.766	1.741	0.046	14.602	20.006	2.623	100.581	49.6468	93.7317
188	Lherz	54.135	0.148	4.896	1.701	1.636	0.082	14.402	20.144	2.633	99.777	50.1635	94.0102
189	Lherz	54.682	0.187	3.405	1.393	1.55	0.036	16.053	21.548	1.757	100.611	49.1348	94.8625
190	Lherz	54.289	0.334	3.698	1.808	1.47	0.054	15.441	20.844	1.936	99.874	49.276	94.9309
191	Lherz	55.921	0.039	1.721	0.531	1.307	0.017	17.517	23.122	0.794	100.969	48.7156	95.9831
192	Lherz	55.921	0.039	1.721	0.531	1.307	0.017	17.517	23.122	0.794	100.969	48.7156	95.9831
193	Lherz	55.367	0.077	1.889	1.374	1.177	0.067	17.029	22.369	1.313	100.662	48.5943	96.268
194	Lherz	55.395	0.111	2.443	1.659	1.192	0.029	16.37	22.07	1.424	100.693	49.2443	96.0761
195	Lherz	55.302	0.085	2.475	1.483	1.197	0.027	15.781	22.593	1.46	100.403	50.7458	95.9192
196	Metasom-te	54.727	0.936	4.166	0.223	6.193	0.117	17.282	15.64	2.734	102.018	39.4405	83.2643
197	Oliv-te	55.374	0.025	2.404	0.974	1.795	0.056	17.313	22.645	0.849	101.435	48.4875	94.5043
198	Opx-te	55.363	0.549	6.332	1.815	1.877	0.031	13.079	17.617	3.986	100.649	49.2215	92.5502
199	Opx-te	55.087	0.695	5.866	1.858	1.979	0.046	12.946	17.865	4.122	100.464	49.8264	92.103
200	Opx-te	55.065	0.539	6.168	2.7	1.842	0.027	12.012	16.777	4.793	99.923	50.1276	92.0801
201	Opx-te	56.086	0.438	6.742	2.214	1.934	0.014	12.242	16.17	4.963	100.803	48.7324	91.8603
202	Opx-te	53.874	0.645	6.648	1.855	1.716	0.073	13.247	17.873	3.81	99.741	49.263	93.2264
203	Opx-te	54.669	0.413	4.458	0.97	1.058	0.02	15.438	21.535	1.984	100.545	50.0962	96.2984
204	Opx-te	54.113	0.431	5.746	1.028	1.289	0.066	14.972	20.984	2.194	100.823	50.2145	95.3935
205	Webst	54.787	0.757	6.05	1.21	1.752	0.016	13.476	18.214	3.993	100.255	49.307	93.2035
206	Webst	53.463	0.28	4.809	1.893	1.602	0.054	14.622	20.245	2.669	99.637	49.9095	94.2106
207	Webst	54.722	0.352	2.669	0.781	5.163	0.117	16.223	18.321	2.418	100.766	44.8339	84.8533
208	Webst	53.665	0.19	4.116	1.348	1.773	0.056	15.28	20.957	2.192	99.577	49.6732	93.8894
209	Webst	51.614	0.101	5.431	1.509	1.86	0.083	15.23	22.928	0.799	99.555	52.0012	93.5891
210	Webst	56.296	0.142	1.474	1.964	2.089	0.07	16.29	21.499	2.099	101.923	48.7117	93.2899
211	Webst	53.789	0.619	4.482	1.858	1.458	0.073	14.974	20.233	2.804	100.29	49.3	94.8215
212	Webst	54.361	0.108	3.087	0.728	1.607	0.058	16.18	22.97	1.17	100.269	50.5353	94.7232
213	Webst	53.445	0.329	3.061	1.263	4.536	0.092	15.083	18.954	2.963	99.726	47.4883	85.5666
214	Webst	53.802	0.277	3.142	1.388	4.565	0.123	15.43	18.831	2.987	100.545	46.7593	85.7676
215	Webst	53.916	0.234	1.916	1.178	4.632	0.127	15.758	19.805	2.329	99.895	47.4918	85.8464
216	Webst	53.7	0.202	2.228	1.398	3.957	0.097	15.699	19.828	2.326	99.435	47.6143	87.6136
217	Webst	54.151	0.203	2.161	1.017	3.84	0.124	15.745	19.897	2.275	99.413	47.6279	87.9667
218	Marid	54.303	0.267	3.12	1.569	1.946	0.044	14.817	20.56	2.969	99.595	49.9643	93.1389
219	Marid	54.339	0.067	1.442	0.88	2.114	0.077	17.057	21.735	1.755	99.466	47.8354	93.5003
220	Marid	54.295	0.264	2.702	0.975	4.96	0.095	15.378	19.293	2.593	100.555	47.4473	84.6805
221	Marid	54.287	0.277	2.655	0.963	4.9	0.09	15.442	19.631	2.546	100.791	47.7769	84.8911
222	Marid	54.204	0.356	2.778	0.972	4.973	0.102	15.186	19.609	2.636	100.816	48.1662	84.4826
223	Marid	52.264	0.504	5.227	1.36	1.564	0.081	14.46	20.849	2.423	98.732	50.9229	94.2804
224	Marid	53.468	0.561	1.23	0.233	6.309	0.132	17.04	19.219	1.4	99.592	44.8022	82.8042
225	Marid	54.257	0.155	0.956	0.672	5.316	0.109	15.822	20.101	2.496	99.884	47.7607	84.143
226	Marid	55.137	0.196	0.928	0.533	5.404	0.128	16.176	20.162	2.099	100.763	47.2844	84.2191
227	Marid	54.116	0.165	0.92	0.475	5.44	0.102	16.397	20.233	2.162	100.01	47.0339	84.3109
228	Marid	54.378	0.173	0.837	0.16	5.547	0.126	16.371	20.306	2	99.898	47.1632	84.0303
229	Marid	54.035	0.27	1.067	0.546	5.355	0.136	16.377	20.28	2.403	100.469	47.1221	84.5022
230	Marid	54.595	0.31	0.939	0.562	5.446	0.126	16.107	20.147	2.169	100.401	47.3725	84.0587
231	Marid	54.703	0.206	0.909	0.469	5.714	0.1	18.248	18.146	2.022	100.517	41.712	85.0606
232	Marid	53.836	0.204	3.178	0.938	1.331	0.072	16.422	22.078	1.838	99.897	49.1741	95.6517
1-159 - macrocrysts, 160-217 - xenoliths, 218-232 - marid. ca#=Ca/(Ca+Mg)*100, mg#=Mg/(Mg+Fe)*100
