# Supplementary material
Source: MDPI journal article supplement (https://www.mdpi.com/2075-163X/13/11/1404)
Supplement: s1 [file s1 › Table s7. Representative EMPA analyses of phlogopites from Obnazhennaya groundmass kimberlites.xlsx]

## Sheet: Лист1
Table s7. EMPA analyses (1-19) of Phl from kimberlites of Obnazhennaya pipe. Analyses (1-11) of Phl from Velikan dyke.
	1	2	3	4	5	6	7	8	9	10	11	12	13	14	15	16	17	18	19	Middle (19)
SiO2	41.49	41.1	42	41.83	41.39	38.95	40.84	39.77	39.26	38.8	37.93	39.12	38.68	39.24	39.7	38.47	39.89	38.28	41.29	39.8963
TiO2	0.96	0.43	1.94	0.3	0.1	2.67	3.05	2.62	2.63	2.11	2.4	2.44	1.81	4.42	0.26	2.59	4.37	2.36	0.65	2.00579
Al2O3	10.79	10.86	10.79	8.94	10.51	14.05	11.34	15.46	16.72	15.98	15.72	15.79	13.05	14.07	10.4	15.74	14.52	14.82	10.89	13.1811
Cr2O3	0.36	0.43	0.01	0.29	0.18	0.1	0.12	0.03	0.05	0.05	0.02	0.01	0.28	0.26	0.13	0.01	1.11	0.01	0.09	0.186316
FeO	5.44	5.45	5.33	4.01	3.59	6.13	5.9	6.82	5.73	8.04	5.63	5.8	5.91	7.13	5.16	5.65	5.77	5.65	7.11	5.80263
MnO	0.03	0.03	0.03	0.02	0.02	0.04	0.04	0.04	0.04	0.04	0.04	0.04	0.02	0.03	0.03	0.03	0.03	0.05	0.04	0.0336842
MgO	23.43	22.55	23.81	26.71	25.01	20.93	21.88	22.49	23.55	21.37	22.97	23.07	21.69	19.14	21.96	21.77	19.59	22.82	22.43	22.4826
Na2O	0.16	0.21	0.12	0.14	0.21	0.33	0.22	0.47	0.31	0.4	0.36	0.33	0.39	0.26	0.16	0.29	0.35	0.3	0.15	0.271579
K2O	9.61	10.44	8.84	8.69	11.43	9.63	8.71	9.41	9.4	9.77	9.36	9.89	9.48	10.37	10.62	10.14	10.59	9.92	9.99	9.80474
BaO	0.07	0.07	0.09	0.03	0	0.75	0.02	0.74	0.95	0.7	0.99	0.92	0.35	0.34	0.04	1.04	0.2	0.95	0.01	0.434737
NiO	0.17	0.13	0.04	0.15	0.15	0.05	0.11	0.03	0.05	0	0.02	0.01	0.02	0.01	0.17	0.04	0.13	0.03	0.07	0.0726316
F	0.69	0.54	0.43	0.54	0.62	0.37	0.3	0.37	0.28	0.32	0.27	0.34	0.28	2.43	0.58	0.47	0.3	0.44	0.47	0.528421
SO3	0.06	0.03	0.02	0	0.01	0	0	0.02	0.04	0.03	0.01	0	0.02	0.05	0	0	0.03	0.01	0	0.0173684
Total	93.26	92.26	93.42	91.63	93.21	93.99	92.54	98.26	99	97.61	95.72	97.76	91.97	97.73	89.2	96.23	96.87	95.64	93.17	94.7089
1-7 from the sample 7-237; 8-14 from the sample 7-386; 15-19 from the sample 7-387.
Table s7. Analyses of Phl (1-11) from kimberlites of Velikan dyke.
No	1	2	3	4	5	6	7	8	9	10	11	Middle (11)
SiO2	34.08	33.93	31.06	30.76	35.21	34.98	32.84	35.28	37.67	34.34	33.42	33.9609
TiO2	0.78	0.72	1.05	1.15	0.75	0.67	0.95	0.68	0.88	0.87	0.95	0.859091
Al2O3	18.27	18.27	18.78	18.63	17.35	17.04	19.35	18.2	17.46	19.35	19.93	18.4209
FeO	2.89	3.04	2.74	2.62	2.69	2.64	2.95	3.33	2.86	2.95	2.82	2.86636
MgO	23.98	23.96	22.93	22.77	24	23.83	24.78	25.01	26.35	24.34	24.44	24.2173
K2O	8.07	8.13	6.96	6.87	9.01	9.09	6.94	8.43	9.03	8.3	7.61	8.04
BaO	7.2	7.27	9.96	9.9	4.18	4.02	10.63	6.2	5.29	7.05	8.52	7.29273
F	0	0	0.56	0.49	0	0	0.77	0	0.47	0	0	0.208182
Total	95.28	95.32	94.05	93.2	93.18	92.27	99.2	97.13	100.02	97.19	97.69	95.8664
Table s7. Analyses of Ba-containing Phl (kinoshitalite) from kimberlites of Velikan dyke.
Comment	im42-4	im42-6	im42-7
SiO2	29.370	29.327	24.693
Al2O3	16.523	16.240	18.142
FeO	4.401	4.089	6.889
MnO	0.083	0.058	0.000
MgO	26.946	26.001	24.026
CaO	0.222	0.155	0.413
Na2O	0.936	0.780	0.903
K2O	1.095	1.127	1.417
SrO	0.137	0.100	0.000
BaO	11.076	8.860	15.254
F	1.412	1.172	1.777
Total	91.652	87.448	92.808
