# Supplementary material
Source: MDPI journal article supplement (https://www.mdpi.com/2075-163X/13/11/1404)
Supplement: s1 [file s1 › Table s8. Representative EMPA analyses of perovskite from Obnazhennaya groundmass kimberlites.xlsx]

## Sheet: Prv
Table s8. Representative analyses of perovskite from Obnazhennaya pipe and Velikan dyke, wt%.
	1	2	3	4	5	6	7	8	9	10	11	Middle (11)
SiO2	0	0.03	0.03	0.02	0.07	0.12	0.06	0.04	0.02	0	0.07	0.0418182
TiO2	53.1	55.11	53.46	54.46	54.89	53.1	54.52	52.94	53	53.12	53.52	53.7473
Al2O3	0.38	0.09	0.18	0.28	0.19	1.28	0.23	0.31	0.33	0.31	0.09	0.333636
FeO	2.44	2.09	2.03	2.32	2.34	2.53	2.07	2.79	2.48	2.42	1.47	2.27091
MgO	0.07	0.02	0.11	0	0.15	0.16	0.08	0.01	0.1	0.05	0.08	0.0754545
CaO	35.46	34.5	34.54	33.29	32.66	33.87	35.29	35.33	34.75	34.95	35.8	34.5855
Na2O	0.98	1.19	1.38	1.29	1.52	1.24	1.04	1.01	1.26	0.99	1.54	1.22182
BaO	0.23	0.26	0.15	0.13	0.34	0.12	0.13	0.17	0.14	0.1	0.19	0.178182
Nb2O5	2.03	1.72	2.12	2.23	1.88	2.14	1.93	2.52	2.38	2.28	2.81	2.18545
Ce2O3	3.65	3.58	3.85	4.05	4.04	3.92	3.36	3.6	3.94	4.1	2.86	3.72273
Nd2O3	0.39	0.28	0.4	0.4	0.42	0.23	0.28	0.22	0.18	0.53	0.45	0.343636
F	0.36	0.06	0.47	0.2	0.17	0.05	0.13	0.09	0.2	0.19	0.11	0.184545
Total	99.09	98.93	98.72	98.67	98.68	98.76	99.13	99.04	98.8	99.05	98.99	98.8964
Analyses of samples: 1-10 from the sample 7-386; 11 from the sample 7-387.
Representative analyses of perovskite from Velikan dyke, wt%.
	5	10	11	12	13	16	18	19	25	26	27	28	29	31	32	35	36	37	38	40	42	43	45	46
Comment	prvs-1	im33-3	im33-4	im42-9c	im42-9r	im42-12	im48-8c	im48-8r	prvs1-r	prvs2-c	prvs2-r	prvs3-c	prvs3-r	prvs5-c	prvs5-r	prvs8c	prvs8r	prvs9c	prvs9r	prvs11	prvs13c	prvs13r	prvs15	prvs16
TiO2	56.365	56.890	56.223	55.959	54.921	55.722	55.070	55.911	55.290	54.890	55.189	55.162	55.291	54.387	53.858	55.244	55.667	54.069	55.992	55.459	55.037	56.616	54.748	54.602
Al2O3	0.220	0.228	0.220	0.224	0.442	0.266	0.297	0.285	0.209	0.242	0.284	0.239	0.309	0.237	0.277	0.218	0.242	0.284	0.258	0.254	0.232	0.279	0.204	0.219
Cr2O3	0.017	0.000	0.060	0.006	0.000	0.000	0.000	0.000	0.000	0.000	0.000	0.065	0.000	0.096	0.000	0.000	0.000	0.000	0.000	0.000	0.000	0.000	0.000	0.000
FeO	0.873	1.140	1.202	1.013	1.562	1.103	1.264	1.230	1.070	1.108	1.026	1.097	1.401	1.418	1.155	1.015	1.059	1.268	1.239	1.114	1.264	1.150	1.011	1.108
MgO	0.080	0.000	0.051	0.097	0.000	0.000	0.000	0.051	0.044	0.061	0.000	0.078	0.000	0.045	0.058	0.047	0.058	0.085	0.000	0.000	0.056	0.064	0.065	0.066
CaO	36.228	38.246	36.560	36.619	39.376	38.443	38.345	38.579	37.724	35.827	37.594	35.855	39.322	35.545	38.306	36.711	38.260	35.182	38.102	38.340	35.624	37.867	35.769	35.324
Na2O	0.703	0.408	0.523	0.607	0.112	0.357	0.389	0.319	0.473	0.742	0.373	0.637	0.120	0.821	0.372	0.535	0.399	0.824	0.434	0.351	0.745	0.387	0.727	0.783
La2O3	0.955	0.663	0.863	0.931	0.437	0.901	0.721	0.738	0.846	0.904	0.829	0.982	0.389	0.999	0.699	0.800	0.763	1.098	0.805	0.808	1.014	0.815	0.839	0.928
Ce2O3	2.288	1.467	2.103	2.137	0.494	1.804	1.718	1.227	1.567	2.579	1.889	2.632	0.549	2.674	1.581	2.415	1.710	2.683	1.504	1.442	2.193	1.547	2.350	2.681
Nb2O5	0.772	0.638	0.639	0.525	1.238	0.814	0.661	0.917	0.853	0.677	0.658	0.736	1.208	0.553	0.985	0.627	0.526	0.687	0.885	0.656	0.591	0.823	0.719	0.761
Nd2O3	0.823	0.479	0.813	0.900	0.000	0.437	0.519	0.403	0.538	1.028	0.662	0.857	0.000	1.054	0.488	0.831	0.554	0.888	0.500	0.441	0.812	0.457	0.967	0.966
Th2O3	1.044	0.000	0.532	0.907	0.000	0.000	0.100	0.000	0.000	1.314	0.000	1.226	0.000	1.495	0.000	0.411	0.000	1.394	0.154	0.105	0.943	0.000	1.248	1.498
F	0.000	0.000	0.195	0.000	0.201	0.000	0.000	0.000	0.157	0.183	0.176	0.223	0.245	0.131	0.000	0.000	0.157	0.081	0.219	0.220	0.000	0.126	0.000	0.000
Total	100.594	100.561	100.139	100.209	99.148	100.100	99.411	100.091	98.883	99.661	98.988	99.899	99.000	99.563	98.076	99.176	99.530	98.757	100.281	99.408	98.831	100.333	98.859	99.267
