# Supplementary material
Source: MDPI journal article supplement (https://www.mdpi.com/2075-163X/13/11/1404)
Supplement: s1 [file s1 › Table s9. Compositions of calcite and dolomite from Obnazhennaya groundmass kimberlites.xlsx]

## Sheet: Лист1
Table s9-1. Compositions of calcite and dolomite from Obnazhennaya pipe, wt%.
No. analysis	SiO2	FeO	MnO	MgO	CaO	SrO	BaO	F	La2O3	Ce2O3	Total
1	0.03	0.09	0.05	0.36	51.79	0.49	0.49	0.14	n.d.	n.d.	53.44
2	0.02	0.09	0.02	0.61	53.69	0.33	0.17	0.11	n.d.	n.d.	55.04
3	0.07	0.12	0.14	0.83	50.25	0.51	0.75	<0.1	n.d.	n.d.	52.67
4	0.24	0.13	0.02	0.91	59.1	0.1	0.16	<0.1	n.d.	n.d.	60.66
5	<0.05	0.15	0.5	9.94	33.53	0.15	0.14	<0.1	n.d.	n.d.	44.41
6	<0.05	0.32	0.69	12.75	36.7	<0.1	0.11	0.124	n.d.	n.d.	50.694
7	<0.05	0.12	0.75	21.07	33.4	<0.1	0.08	0.1	n.d.	n.d.	55.52
8	<0.05	0.16	0.53	18.73	32.8	0.16	<0.1	<0.1	n.d.	n.d.	52.38
9	<0.05	0.16	0.42	0.1	61.35	0.06	0.3	0.14	n.d.	n.d.	62.53
10	<0.05	0.11	0.77	0.82	54.12	0.46	0.75	<0.1	n.d.	n.d.	57.03
11	1.08	0.67	0.66	1.8	47.58	0.45	0.99	0.34	n.d.	n.d.	53.57
12	<0.05	0.08	0.56	0.68	52.98	<0.1	0.04	<0.1	n.d.	n.d.	54.34
13	<0.05	0.41	0.6	0.69	54.6	<0.1	0.26	<0.1	n.d.	n.d.	56.56
14	<0.05	0.3	<0.05	0.49	54.96	0.89	0.38	0.3	n.d.	n.d.	57.32
15	<0.05	0.063	<0.05	0.453	57.431	<0.1	<0.1	<0.1	n.d.	n.d.	57.947
16	<0.05	0	0.16	0.19	57.46	0.21	<0.1	<0.1	n.d.	n.d.	58.02
17	<0.05	0.14	0.01	0.16	58.11	0.83	n.d.	<0.1	0.015	0,01	59.265
18	<0.05	0.19	0.03	0.06	57.66	0.42	n.d.	0.12	0.004	0,05	58.484
19	2.23	0.21	0.02	0.27	50.87	0.18	n.d.	2.95	0.3	0,23	57.03
20	2.23	0.2	0	0.13	51.65	0.1	n.d.	2.75	0.33	0,3	57.39
21	0.66	4.68	0.19	1.7	51.43	0.61	n.d.	<0.1	0.1	0,15	59.37
22	0.07	0.16	0	0.19	56.01	0.52	n.d.	<0.1	0	0,11	56.95
23	2.05	0.23	0.05	3.62	53.82	0.78	n.d.	0.55	0.09	0,20	61.19
24	0.22	0.2	0.01	0.41	56.54	0.41	n.d.	0.06	0	0,04	57.85
Analyses: 1-8 from the sample 7-237 (volcaniclastic kimberlite breccia); 9-13 from the sample 7-387, 14-16 from sample 7-386, 17-20 from the sample 7-384, 21-24 from the sample 7-392; 9-24 (hypabyssal kimberlite).
Table s9-2. Compositions of calcite and dolomite from Velikan dyke, wt%.
5 (see Fig. s15-2		FeO	MnO	MgO	CaO	SrO	BaO				Total
5 (see Fig. s15-2		0.13			53.03	0.67					53.83
6 (see Fig. s15-2					52.9	0.61					53.52
8 (see Fig. s15-2		0.64	0.37	15.74	31.19	0.27	0.27				48.48
10 (see Fig. s15-2		0.19			52.95	0.67					53.81
12 (see Fig. s15-2		1.05	0.84	15.47	30.74	0.52					48.62
