# Supplementary material
Source: MDPI journal article supplement (https://www.mdpi.com/2075-163X/13/11/1404)
Supplement: s1 [file s1 › Table s10. Compositions of minerals from Velikan dyke.xlsx]

## Sheet: Лист1
Site	No point of analysis	Mineral	Total	SiO2	TiO2	Al2O3	FeO	MnO	MgO	CaO	Na2O	K2O	BaO	SrO	Nd2O3	Nb2O5	P2O5	SO3	F
Piece1	1	Phl	95.28	34.08	0.78	18.27	2.89		23.98			8.07	7.2						0
Piece1	2	Phl	95.32	33.93	0.72	18.27	3.04		23.96			8.13	7.27						0
Piece1	3	Phl	94.19	31.06	1.05	18.78	2.74		22.93	0.14		6.96	9.96						0.56
Piece1	4	Phl	93.2	30.76	1.15	18.63	2.62		22.77			6.87	9.9						0.49
Piece1	5	Phl	93.18	35.21	0.75	17.35	2.69		24			9.01	4.18						0
Piece1	6	Phl	92.27	34.98	0.67	17.04	2.64		23.83			9.09	4.02						0
Piece1	7	Phl	99.2	32.84	0.95	19.35	2.95		24.78			6.94	10.63						0.77
Piece1	8	Phl	97.31	35.28	0.68	18.2	3.33		25.01	0.18		8.43	6.2						0
Piece1	9	Phl	100.02	37.67	0.88	17.46	2.86		26.35			9.03	5.29						0.47
Piece1	10	Phl	97.19	34.34	0.87	19.35	2.95		24.34			8.3	7.05						0
Piece1	11	Phl	97.69	33.42	0.95	19.93	2.82		24.44			7.61	8.52						0
Site	No point of analysis	Mineral	Total	SiO2	TiO2	Al2O3	FeO	MnO	MgO	CaO	Na2O	K2O	BaO	SrO	Nd2O3	Nb2O5	P2O5	SO3	F
Piece2	1	Ap	94.14	0.86						51.88				1.41			38.11		1.89
Piece2	2	Ap	94.59	1.03						52.27				1.37			38.11		1.81
Piece2	3	Ilm	97.42		56.13	0.23	1.17			37.68	0.49			0	0.85	0.87
Piece2	4	Ap	97.37	0.9						54.11				1.42			39.02		1.92
Piece2	5	Cal	53.83				0.13			53.03				0.67
Piece2	6	Cal	53.52							52.9				0.61
Piece2	7	Srp	85.93	39.92	0.45	2.14	8.04	0.36	34.86	0.17								0
Piece2	8	Dol	48.48				0.64	0.37	15.74	31.19			0.27	0.27
Piece2	9	TiMag	96.41	0.19	19.1	5.95	55.69	0.77	14.56	0.14
Piece2	10	Cal	53.97				0.19			52.95	0.16			0.67
Piece2	11	Chl	84.19	39.11	0.37	2.53	7.73	0.31	33.95	0.2
Piece2	12	Do	48.79		0.17		1.05	0.84	15.47	30.74				0.52
