# Supplementary material
Source: MDPI journal article supplement (https://www.mdpi.com/2075-163X/13/11/1404)
Supplement: s1 [file s1 › Table s11. Composition of Ol from Kuoika and Ary-Mastakh fields.xlsx]

## Sheet: Лист1
No	Pipe	SiO2	TiO2	Al2O3	Cr2O3	FeO	MnO	MgO	CaO	NiO	Total
				Kuoyka field
1	Montichelitovaya	40.69	0.02	0.022	0.099	10.9	48.26	0.074		0.373	100.438
2	Montichelitovaya	40.61	0.025	0.008	0.107	9.36	49.3	0.024		0.287	99.721
3	Montichelitovaya	40.73	0	0.105	0.115	8.39	49.85	0.087		0.361	99.638
s8-z242	Haerdakh	39.644	0.000	0.012	0.000	17.796	0.281	42.579	0.002		100.325
s8-z227	Noyabrskaya	40.832	0.034	0.041	0.000	8.247	0.125	50.080	0.010		99.414
s8-z228	Noyabrskaya	40.409	0.000	0.000	0.000	10.241	0.075	49.129	0.014		99.879
s8-z229	Noyabrskaya	41.073	0.000	0.014	0.000	9.941	0.069	49.046	0.003		100.161
s8-z231	Noyabrskaya	41.595	0.000	0.000	0.017	7.882	0.087	49.662	0.014		99.267
s1-im19-1	87/2 Dyke	40.141	0.032	0.008	0.04	10.87	0.086	47.454	0.053		98.684
s1-im19-2	87/2 Dyke	40.994	0	0.111	0.06	9.919	0.095	47.803	0.09		99.072
s1-im19-3	87/2 Dyke	40.512	0.039	0	0.039	12.526	0.141	46.981	0.048		100.286
s1-im19-4	87/2 Dyke	40.702	0.008	0.016	0.033	10.637	0.069	47.84	0.052		99.357
s1-im19-5	87/2 Dyke	41.006	0	0.035	0.084	10.208	0.084	47.857	0.088		99.362
s1-im19-6	87/2 Dyke	39.927	0.043	0	0.076	12.817	0.108	46.305	0.049		99.325
s1-im19-7	87/2 Dyke	39.083	0.013	0.117	0.075	9.137	0.075	49.503	0.078		98.081
s1-im19-8	87/2 Dyke	39.064	0.053	0.013	0.022	12.531	0.117	46.357	0.051		98.208
s1-im19-9	87/2 Dyke	39.702	0.032	0	0.041	12.266	0.104	46.134	0.025		98.304
s1-im19-10	87/2 Dyke	38.86	0.029	0.029	0.058	10.796	0.071	48.016	0.046		97.905
s1-im19-11	87/2 Dyke	40.702	0.019	0.026	0.031	8.576	0.048	49.226	0.034		98.662
s1-im19-14	87/2 Dyke	38.472	0.01	0.007	0.021	17.004	0.12	43.355	0.037		99.026
s1-im19-14r	87/2 Dyke	39.66	0.018	0	0.017	12.714	0.094	46.171	0.056		98.73
		Ary-Mastakh field (near Anabar shield)
NAME	pipes Ary-Mastakh field	SiO2	TiO2	Al2O3	Cr2O3	FeO	MnO	MgO	CaO
Bt-122	Beta	40.9	0.03	0.03	0.11	10.25	0.02	47.23	0.14		98.71
Bt-121	Beta	40.22	0.02	0.04	0.02	13.55	0.03	46.01	0.11		100
Bt-120r	Beta	39.38	0.02	0.05	0.08	14.01	0.02	45.71	0.12		99.39
Bt-120-2	Beta	39.85	0.05	0.02	0.06	12.24	0.02	46.82	0.08		99.14
Bt-120-3	Beta	39.65	0.04	0.04	0.09	11.64	0.04	47.56	0.2		99.26
Bt-120-4r	Beta	40.44	0.05	0	0.06	14.17	0.05	46.84	0.14		101.75
Bt-119	Beta	40.56	0.02	0.01	0.09	9.71	0.03	49.41	0.11		99.94
Bt-118c	Beta	40.33	0.03	0.04	0.06	12.56	0.01	46.48	0.13		99.64
Bt-118r	Beta	38.82	0.03	0.03	0.07	13.96	0.04	44.63	0.1		97.68
Bt-117c	Beta	40.14	0.02	0.05	0.1	9.95	0.07	49.52	0.15		100
Bt-117r	Beta	40.6	0.01	0.04	0.05	13.87	0.05	45.05	0.16		99.83
Bt-104	Beta	39.22	0.02	0.11	0.07	11.21	0	47.27	0.15		98.05
Bt-104inc	Beta	40.99	0.04	0.09	0.02	5.2	0.13	53.22	0.22		99.91
Bt-98	Beta	38.83	0.05	0.03	0.05	14.59	0.08	46.96	0.12		100.71
Bt-21	Beta	39.99	0.03	0.16	0.13	9.67	0.06	49.11	0.11		99.26
Bt-31	Beta	39.29	0.05	0.02	0.01	15.47	0.04	43.64	0.18		98.7
Bt-35-1	Beta	40.42	0.04	0.08	0.08	10.76	0.02	48.53	0.14		100.07
Bt-35-2	Beta	41.75	0.02	0.01	0.02	8.33	0.18	51.44	0.29		102.04
Bt-36	Beta	40.34	0.03	0.03	0.11	10.44	0.03	50.24	0.1		101.32
Bt-37	Beta	40.47	0.01	0.01	0.05	9.92	0.05	49	0.13		99.64
Bt-1-1r	Beta	39.79	0.03	0.01	0.06	9.96	0.01	48.04	0.13		98.03
Bt-1-2	Beta	40.12	0.02	0.02	0.07	10.93	0	47.93	0.1		99.19
Bt-1-3	Beta	40.47	0.03	0.1	0.08	11.68	0.01	48.39	0.12		100.88
Bt-1-4	Beta	39.8	0.05	0.09	0.03	13.19	0.06	45.06	0.11		98.39
Bt-1-5	Beta	40.2	0.04	0.04	0.07	12.95	0.09	46.98	0.11		100.48
Bt-2	Beta	40.09	0.05	0.04	0.11	11.27	0.01	49.54	0.11		101.22
Bt-3	Beta	40	0.01	0.03	0.08	9.79	0.05	49.31	0.14		99.41
Bt-4	Beta	39.74	0.04	0.11	0.08	13.17	0.01	47.09	0.1		100.34
Bt-5	Beta	40.11	0.02	0.05	0.1	9.45	0.02	47.99	0.13		97.87
Bt-5r	Beta	39.74	0.06	0.04	0.07	13.31	0.02	44.01	0.14		97.39
Bt-6	Beta	39.88	0.03	0.06	0.08	9.56	0	48.14	0.16		97.91
Bt-8	Beta	40.34	0.03	0	0.06	9.13	0	50.13	0.13		99.82
Bt-9c	Beta	39.11	0.06	0.01	0.02	12.36	0.13	45.83	0.35		97.87
Bt-9r	Beta	37.78	0.08	0	0	10.4	0.18	49.15	0.88		98.47
Bt-10c	Beta	40.43	0.03	0.01	0.1	9.96	0.03	48.55	0.12		99.23
Bt-10r	Beta	39.43	0.05	0.02	0.02	11.7	0.13	47.5	0.48		99.33
Bt-17	Beta	40.02	0.05	0.04	0.12	9.23	0.02	49.32	0.11		98.91
Bt-18	Beta	40.33	0.05	0.09	0.1	8.46	0	49.74	0.1		98.87
Bt-19	Beta	40.21	0.05	0.03	0.03	12	0.04	46.26	0.17		98.79
Bt-20c	Beta	40.23	0.01	0.07	0.08	8.37	0	50	0.13		98.89
Bt-20r	Beta	39.81	0.05	0	0.06	12.01	0	46.73	0.14		98.8
RD-112c	Rudny Dvor	40.01	0.05	0.02	0.07	10.79	0.02	46.39	0.12		97.47
RD-112r	Rudny Dvor	39.21	0.05	0.01	0.05	14.37	0.05	44.91	0.16		98.81
RD-112-2r	Rudny Dvor	39.06	0.05	0.02	0.03	16.76	0.13	42.28	0.19		98.52
RD-112c	Rudny Dvor	40.36	0.03	0.09	0.02	12.56	0.12	46.14	0.12		99.44
RD-111	Rudny Dvor	39.49	0.04	0.09	0.07	13.87	0.04	44.74	0.13		98.47
RD-110	Rudny Dvor	39.35	0.06	0.04	0.06	14.29	0.05	44.47	0.13		98.45
RD-82-1	Rudny Dvor	39.2	0.03	0.17	0.01	16.92	0.09	42.25	0.06		98.73
RD-82-2	Rudny Dvor	39.47	0.04	0.08	0.03	13.85	0.07	45.32	0.13		98.99
RD-82-3	Rudny Dvor	38.92	0.06	0.08	0	16.99	0.09	41.77	0.05		97.96
RD-83	Rudny Dvor	38.83	0.06	0.08	0.05	12.93	0	45.43	0.1		97.48
RD-114	Rudny Dvor	39.14	0.05	0.02	0.02	15.81	0.03	43.19	0.09		98.35
RD-115-1	Rudny Dvor	39.83	0.06	0.03	0.02	14.03	0.12	44.11	0.44		98.64
RD-115-2	Rudny Dvor	38.98	0.02	0.02	0.03	20.78	0.1	38.88	0.08		98.89
RD-115-3	Rudny Dvor	38.45	0.02	0.05	0.02	21.32	0.2	38.71	0.04		98.81
RD-117	Rudny Dvor	40.04	0.06	0.08	0.02	15.3	0.05	43.9	0.09		99.54
RD-118	Rudny Dvor	40.2	0.07	0.06	0.05	11.88	0.03	46.14	0.05		98.48
RD-119	Rudny Dvor	39.56	0.04	0.07	0.03	14.95	0.06	43.97	0.11		98.79
RD-120	Rudny Dvor	39.16	0.07	0.06	0.03	17.06	0.03	43.21	0.1		99.72
RD-121	Rudny Dvor	40.02	0.04	0.09	0.06	10.28	0.03	48.45	0.1		99.07
RD-122	Rudny Dvor	39.29	0.03	0.05	0.06	12.31	0.03	47.07	0.11		98.95
RD-1	Rudny Dvor	39.74	0.05	0.04	0.07	11.89	0.06	46.86	0.11		98.82
RD-123	Rudny Dvor	38.99	0.02	0.06	0.04	16.12	0.05	43.68	0.08		99.04
RD-124	Rudny Dvor	39.66	0.04	0.12	0.04	13.33	0.04	46.59	0.12		99.94
RD-125	Rudny Dvor	39.27	0.04	0.08	0.01	15.32	0	45.77	0.13		100.62
RD-100	Rudny Dvor	39.74	0.04	0	0.05	13.08	0.05	46.94	0.1		100
RD-2	Rudny Dvor	39.58	0.09	0.08	0.04	13.66	0.03	44.86	0.07		98.41
RD-2-2	Rudny Dvor	39	0.06	0.09	0.07	15.78	0.03	44	0.07		99.1
RD-21	Rudny Dvor	39.9	0.03	0.05	0.04	12.09	0.05	45.73	0.13		98.02
RD-22	Rudny Dvor	39.62	0.04	0.04	0.04	13.18	0.03	45.91	0.09		98.95
RD-19	Rudny Dvor	40.1	0.05	0.04	0.06	13.45	0.04	45.5	0.05		99.29
RD-18	Rudny Dvor	38.93	0.06	0	0.02	16.28	0.05	43.97	0.08		99.39
RD-16	Rudny Dvor	39.73	0.04	0.01	0.08	12.84	0.06	45.72	0.12		98.6
RD-15	Rudny Dvor	40.04	0.06	0.1	0.03	13.32	0.09	46.98	0.12		100.74
RD-14	Rudny Dvor	39.71	0.05	0.08	0.08	12.66	0.06	46.47	0.14		99.25
RD-13	Rudny Dvor	39.78	0.03	0.03	0.04	12.52	0.08	46.4	0.13		99.01
RD-12	Rudny Dvor	39.17	0.03	0.03	0.04	12.36	0	46.3	0.12		98.05
RD-11	Rudny Dvor	39.4	0.04	0.03	0.07	14.24	0.03	45.12	0.16		99.09
RD-10	Rudny Dvor	38.31	0.05	0.03	0.02	17.03	0.03	42.46	0.08		98.01
RD-9	Rudny Dvor	39.71	0.03	0.05	0.04	13.87	0.11	45.43	0.15		99.39
RD-8	Rudny Dvor	39.62	0.04	0.03	0.06	13.56	0.05	45.65	0.12		99.13
RD-64A	Rudny Dvor	39.1	0.06	0.04	0.11	12.33	0.05	46.12	0.14		97.95
RD-80	Rudny Dvor	40.24	0.05	0.04	0.07	11.73	0.04	46.59	0.11		98.87
