# Supplementary material
Source: MDPI journal article supplement (https://www.mdpi.com/2075-163X/13/11/1404)

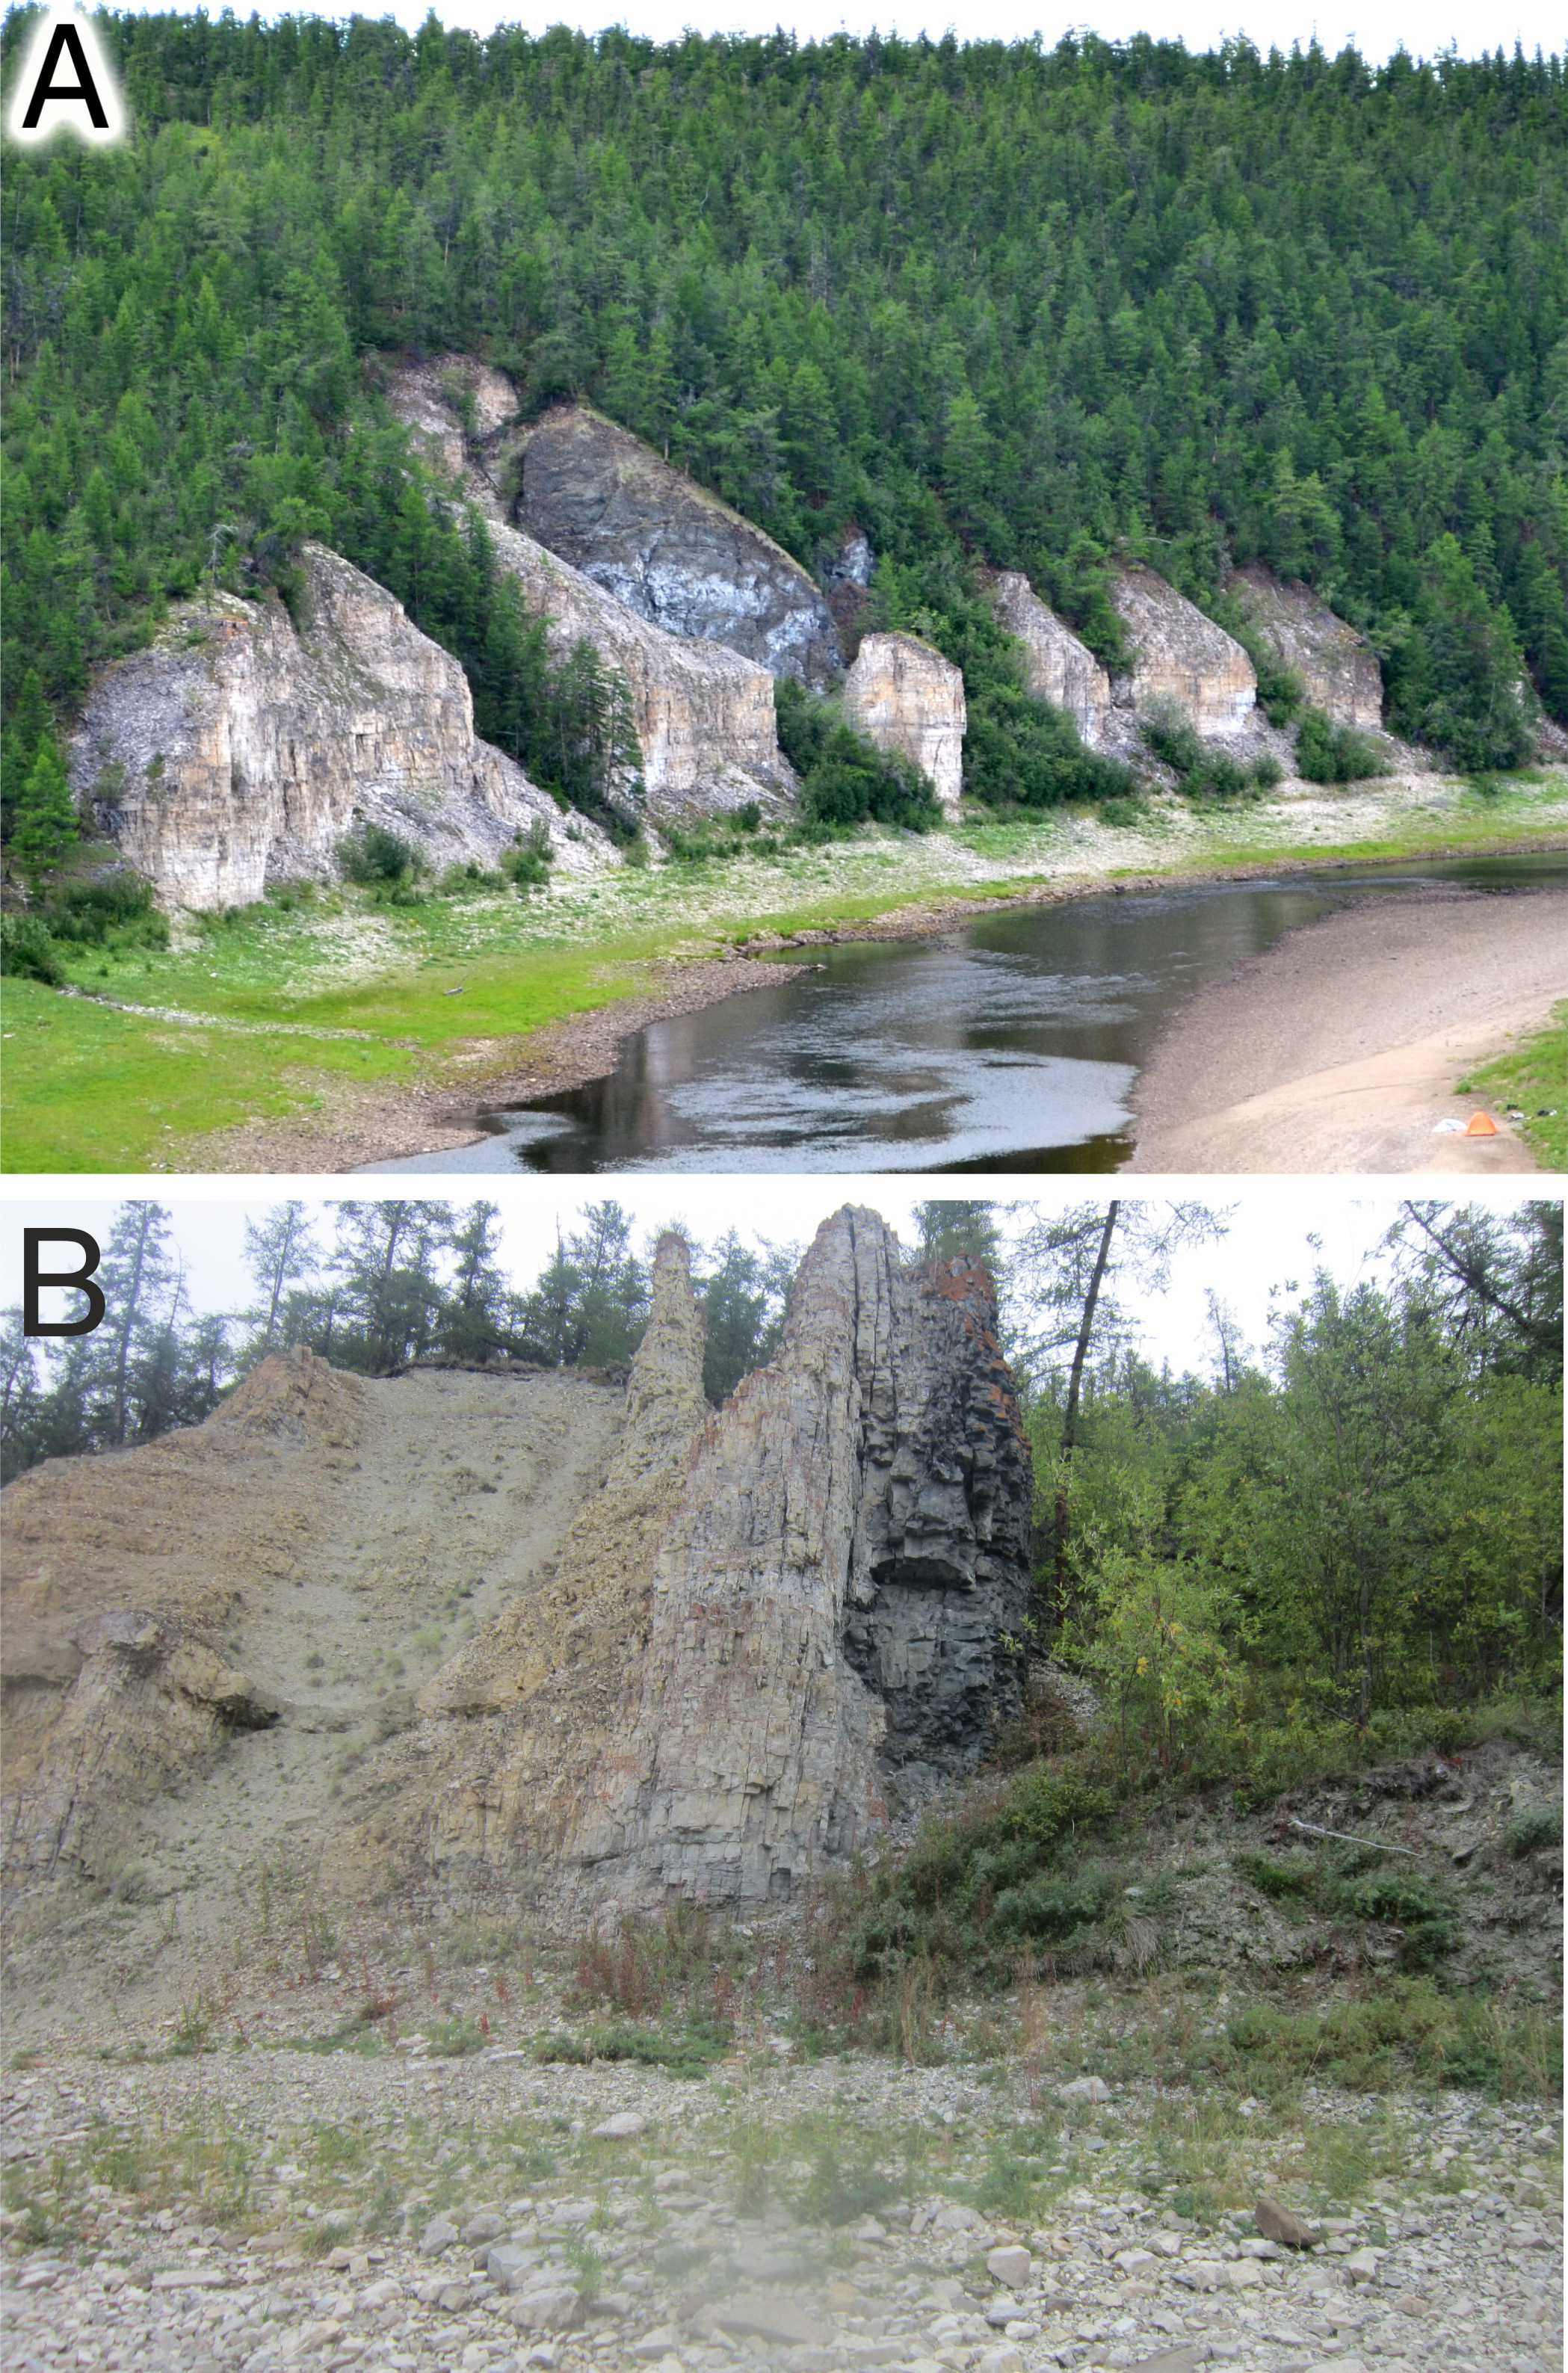

Supplement: s1 [file s1 › Fig 1sA Photo of Obnazhennaya pipe.jpg]

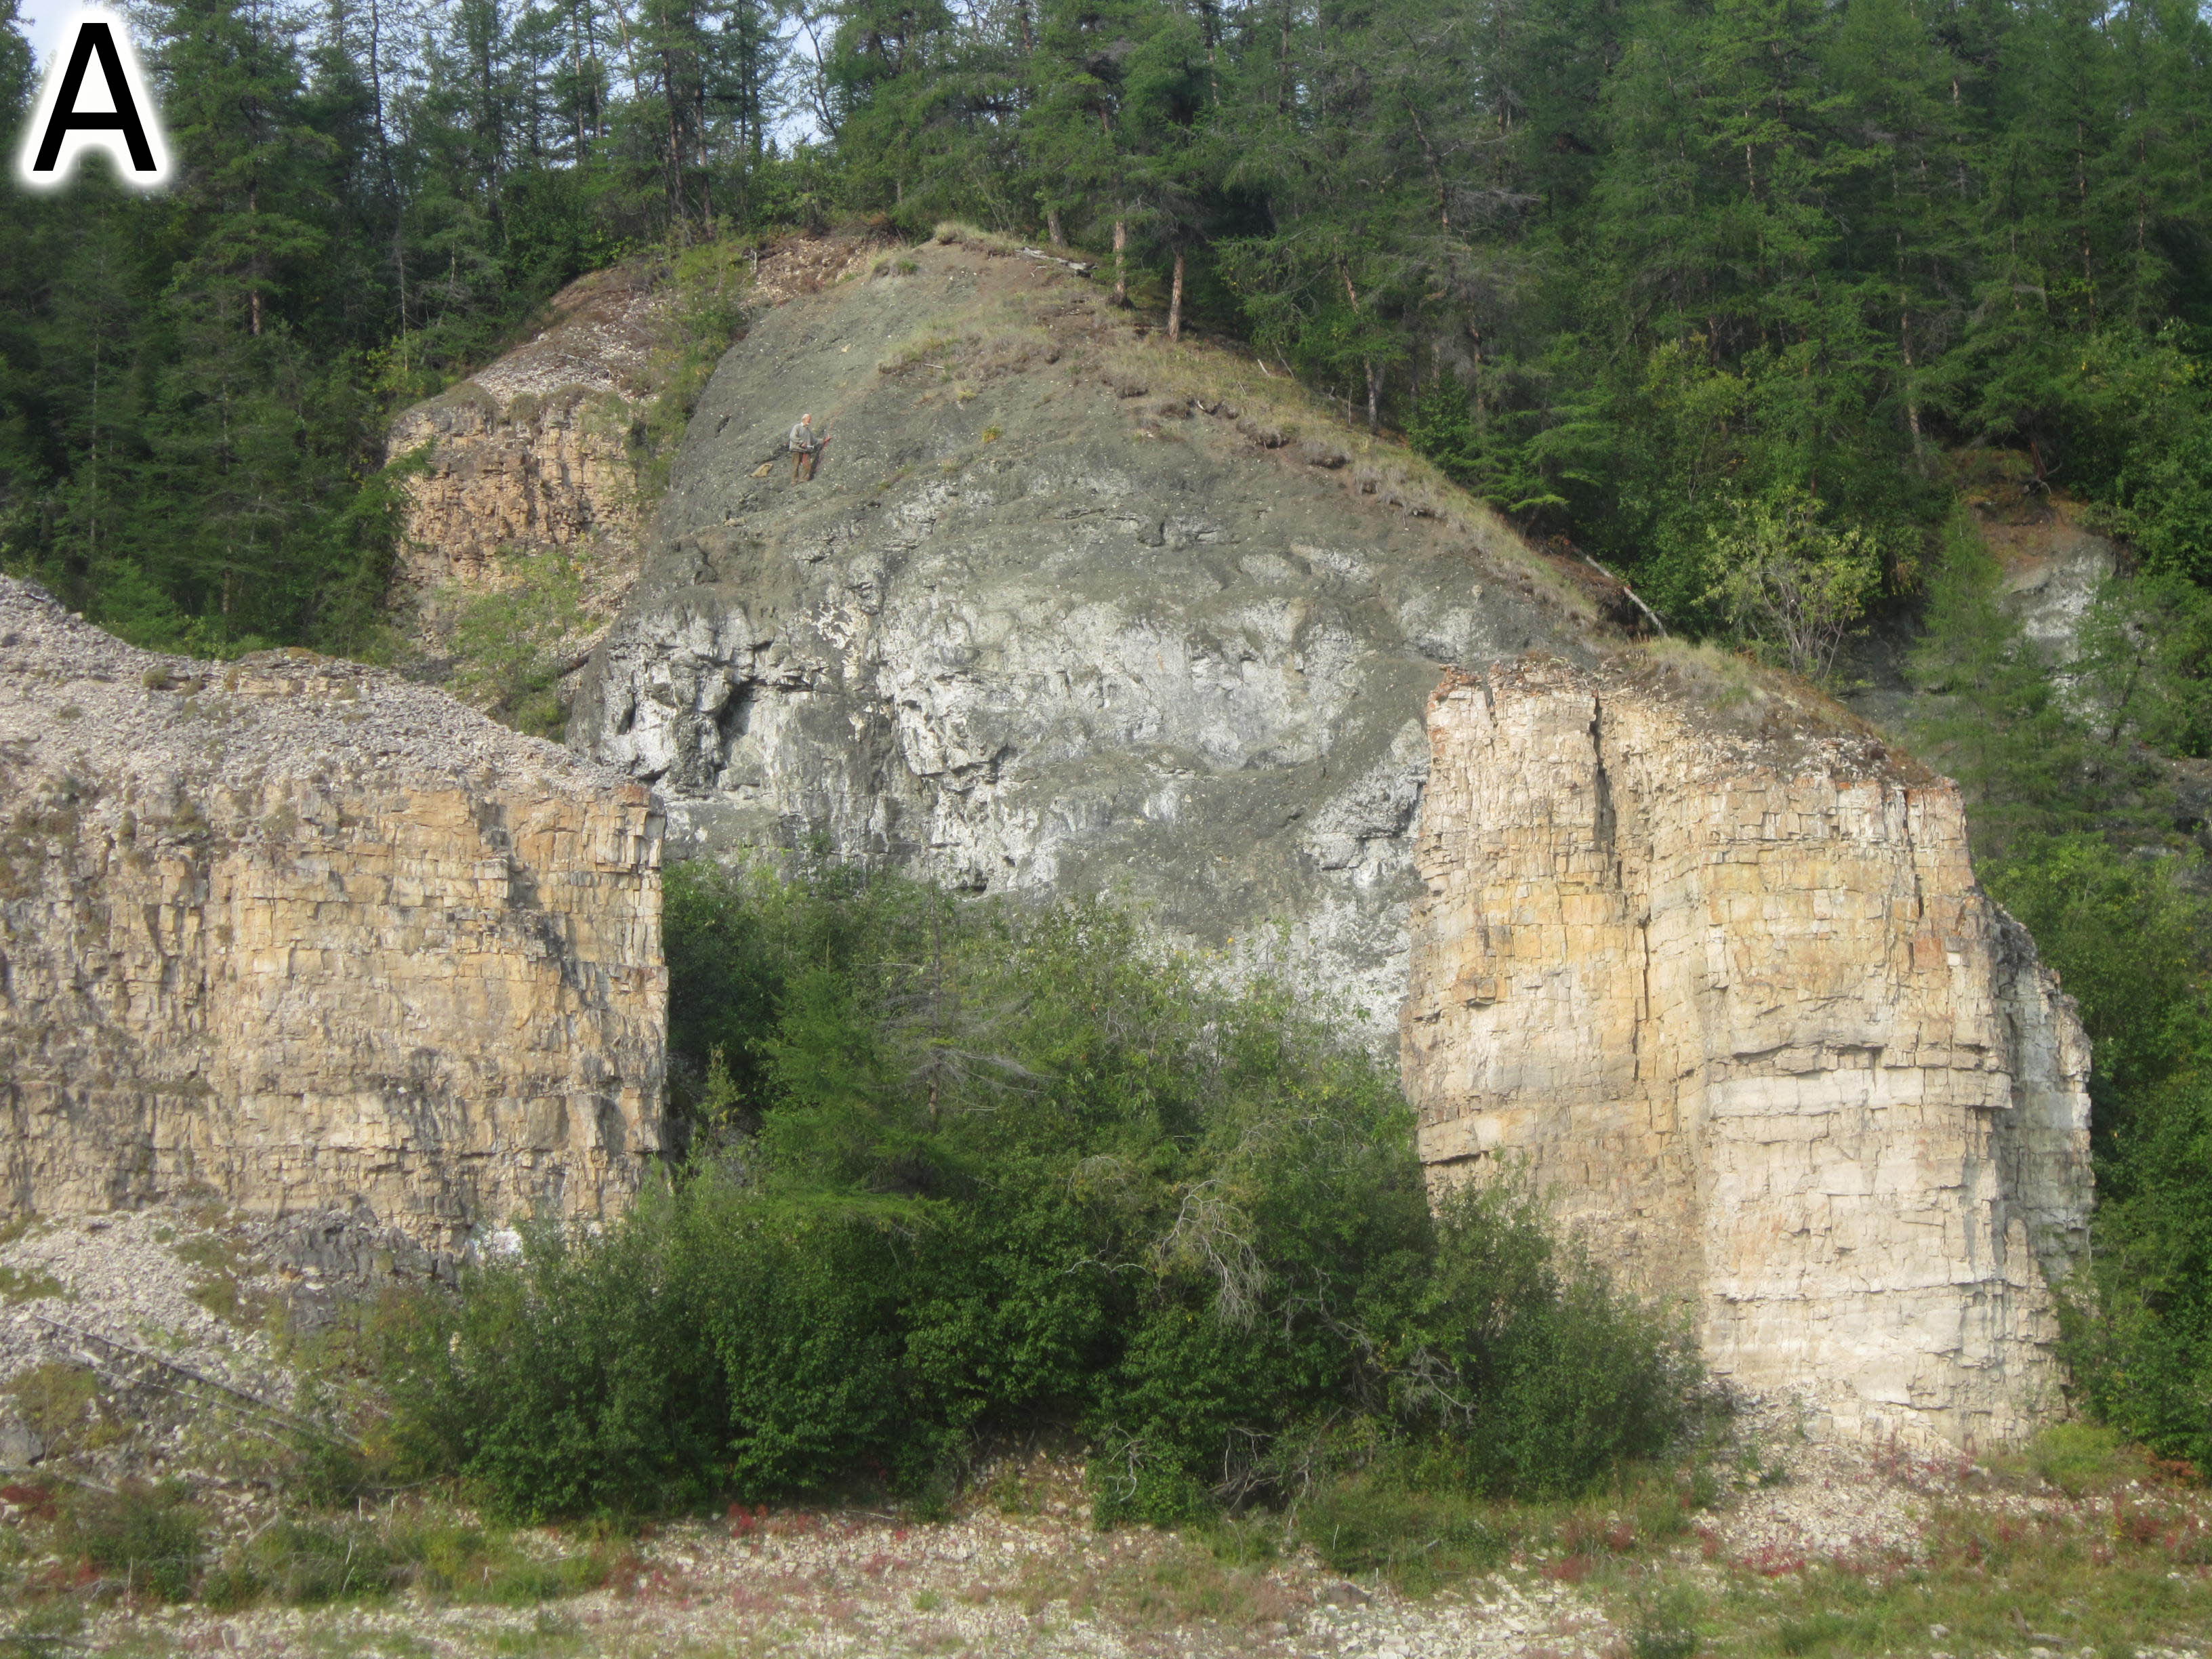

Supplement: s1 [file s1 › Fig. s1B. Photo of outcrop of Obnazhennaya pipe.jpg]

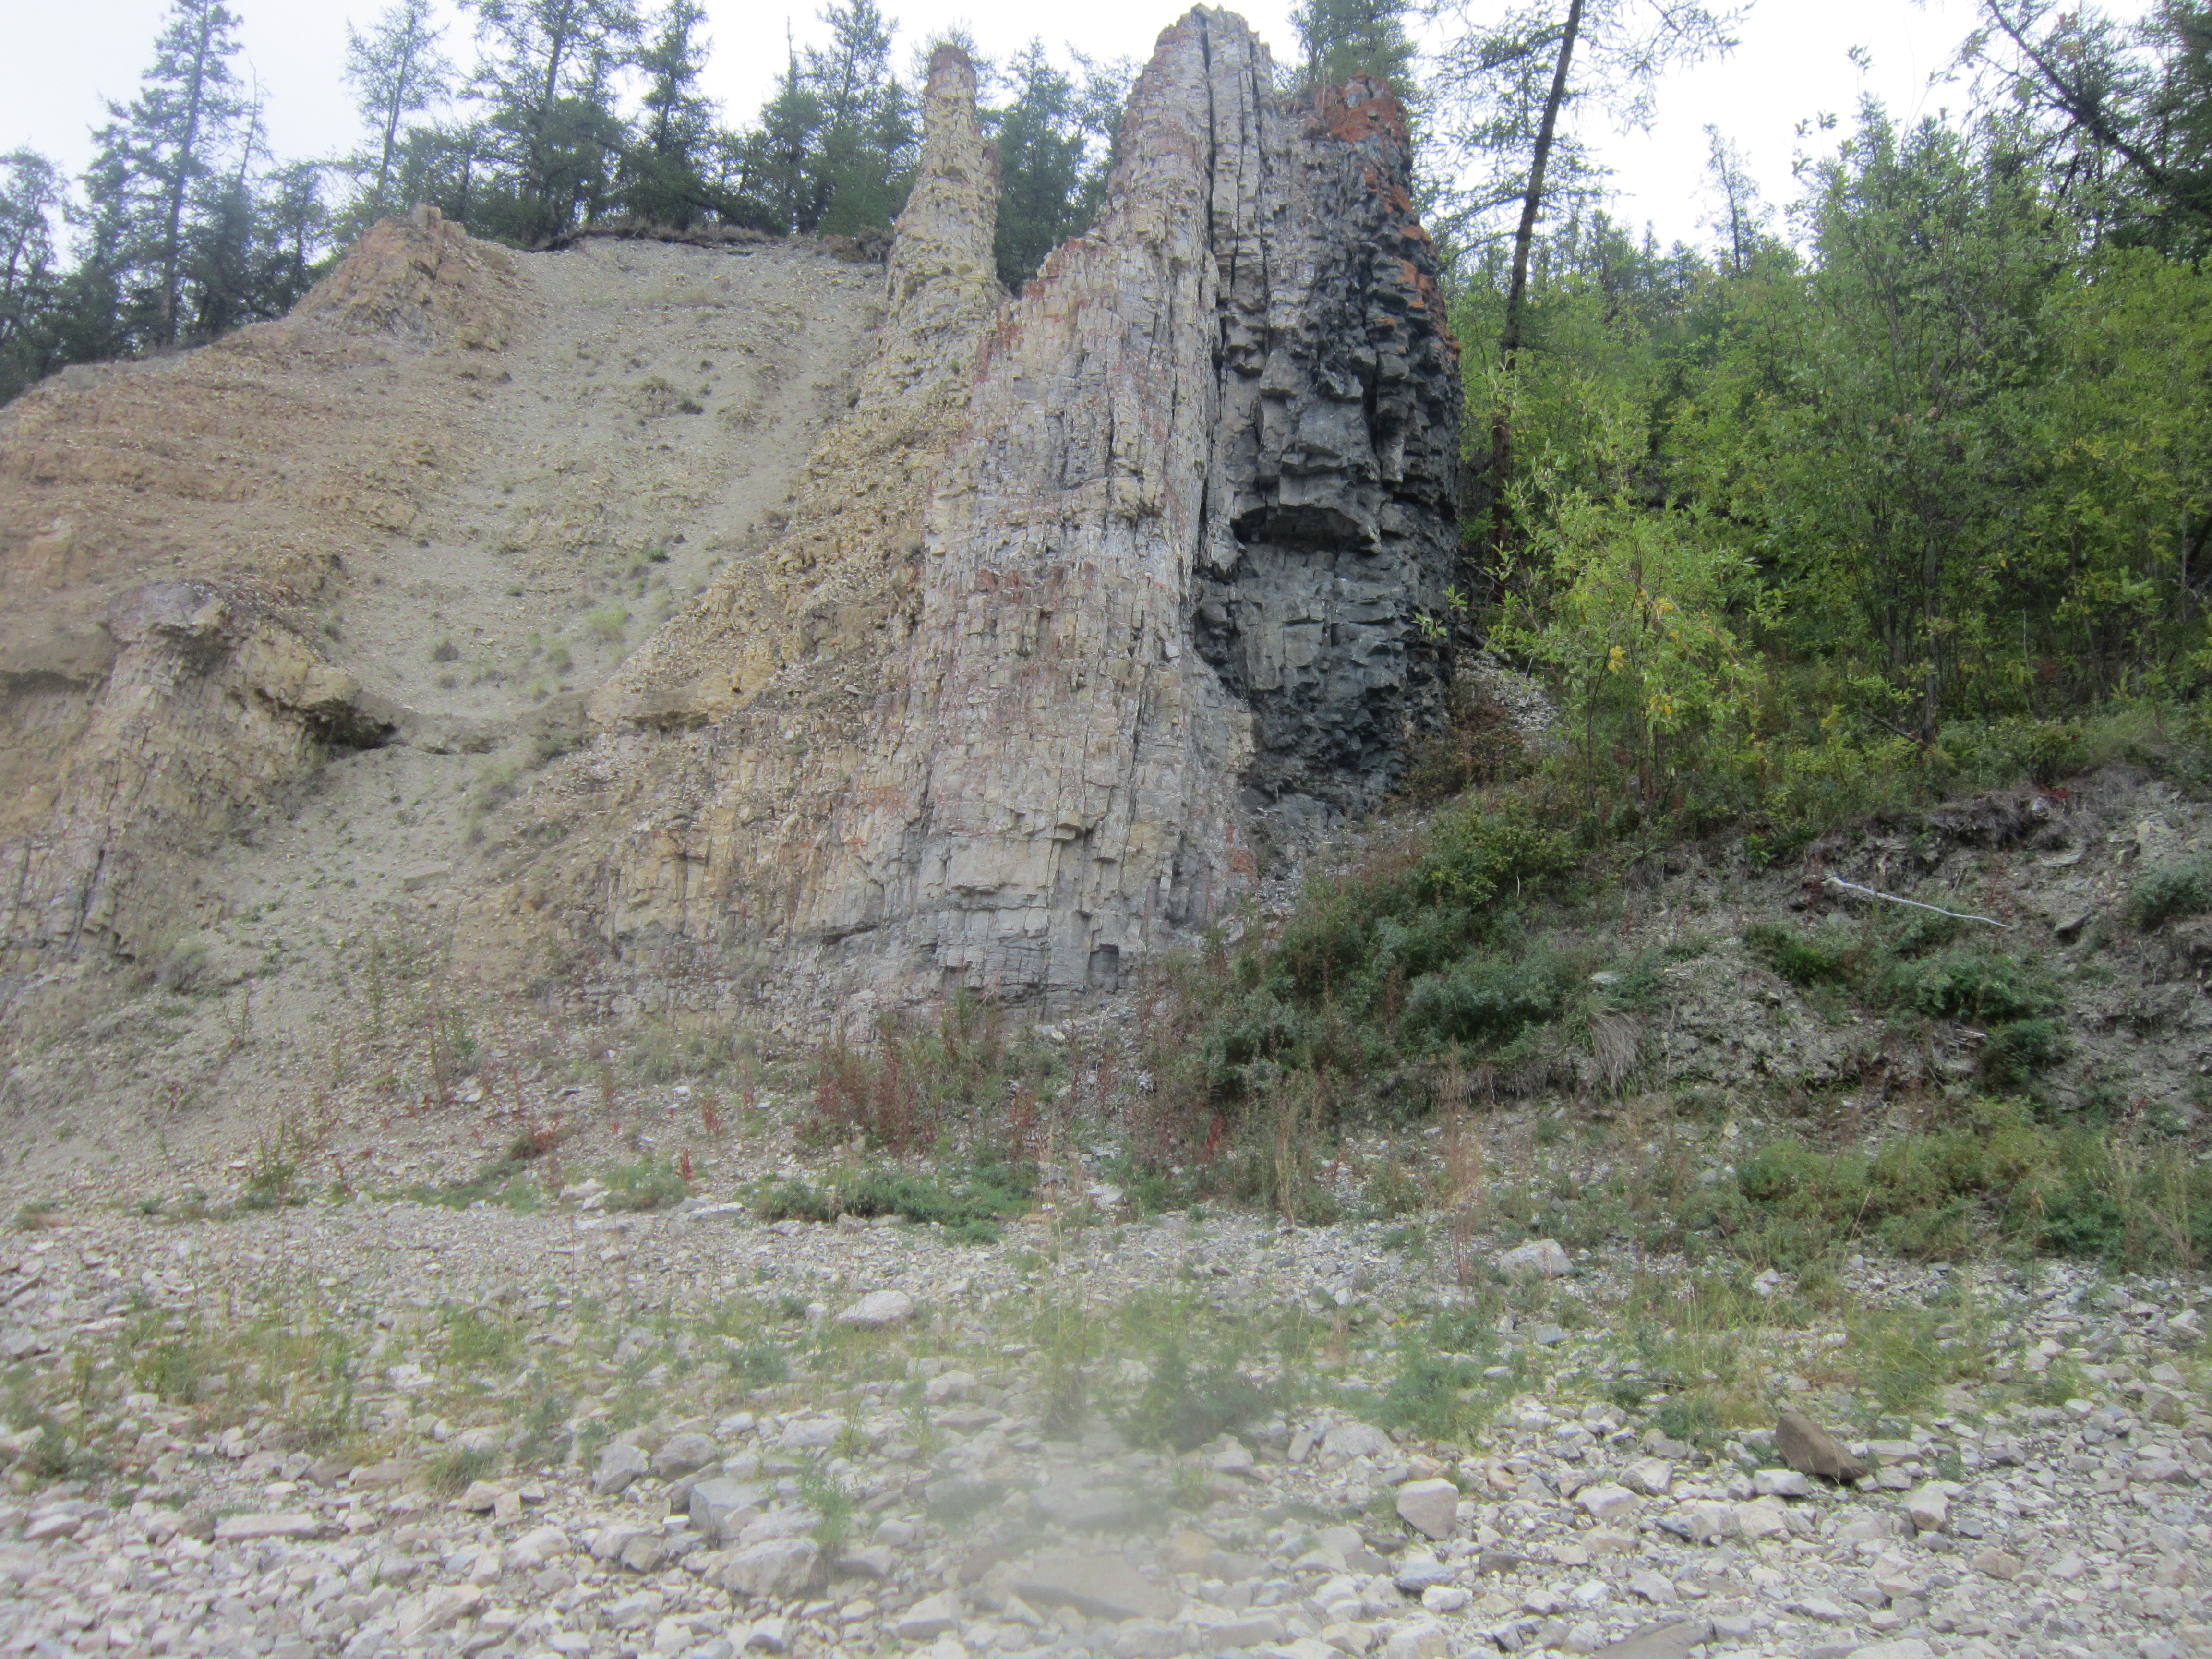

Supplement: s1 [file s1 › Fig. s1C. Photo of outcrop of Velikan dyke.JPG]

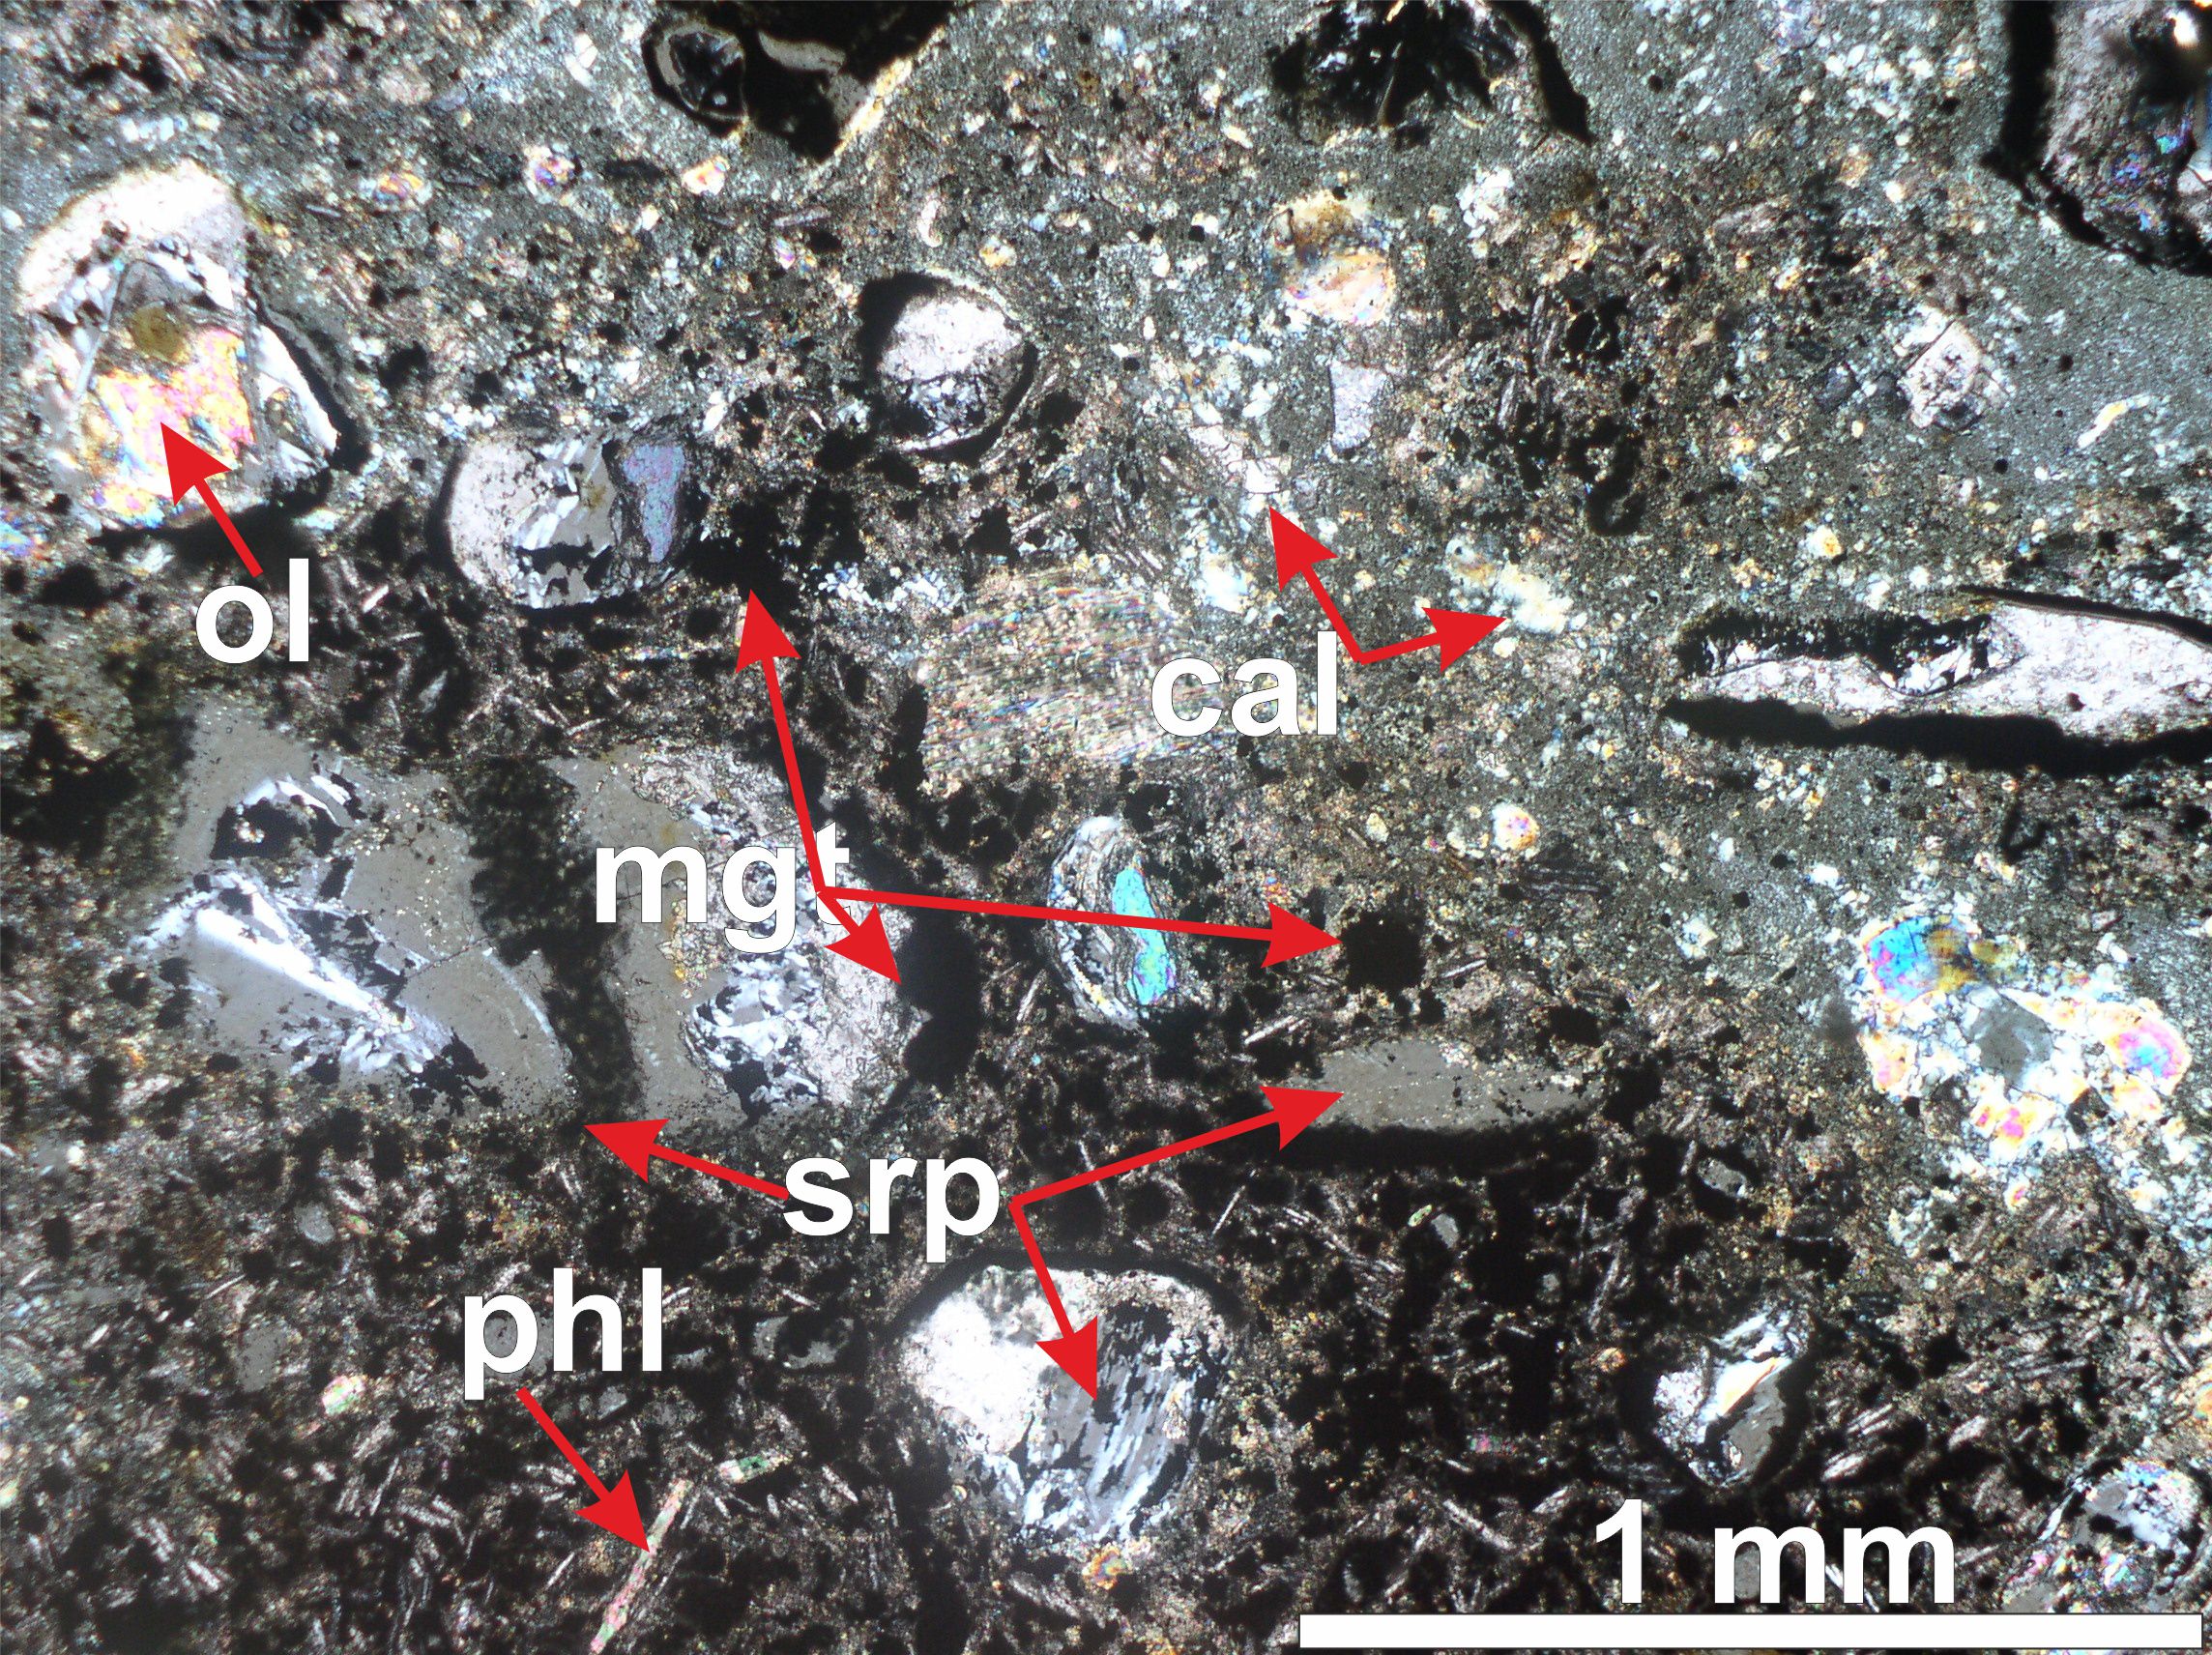

Supplement: s1 [file s1 › Fig. s2-1. Photo of thin section. Obnajennaya pipe, sample 7-257. PK.jpg]

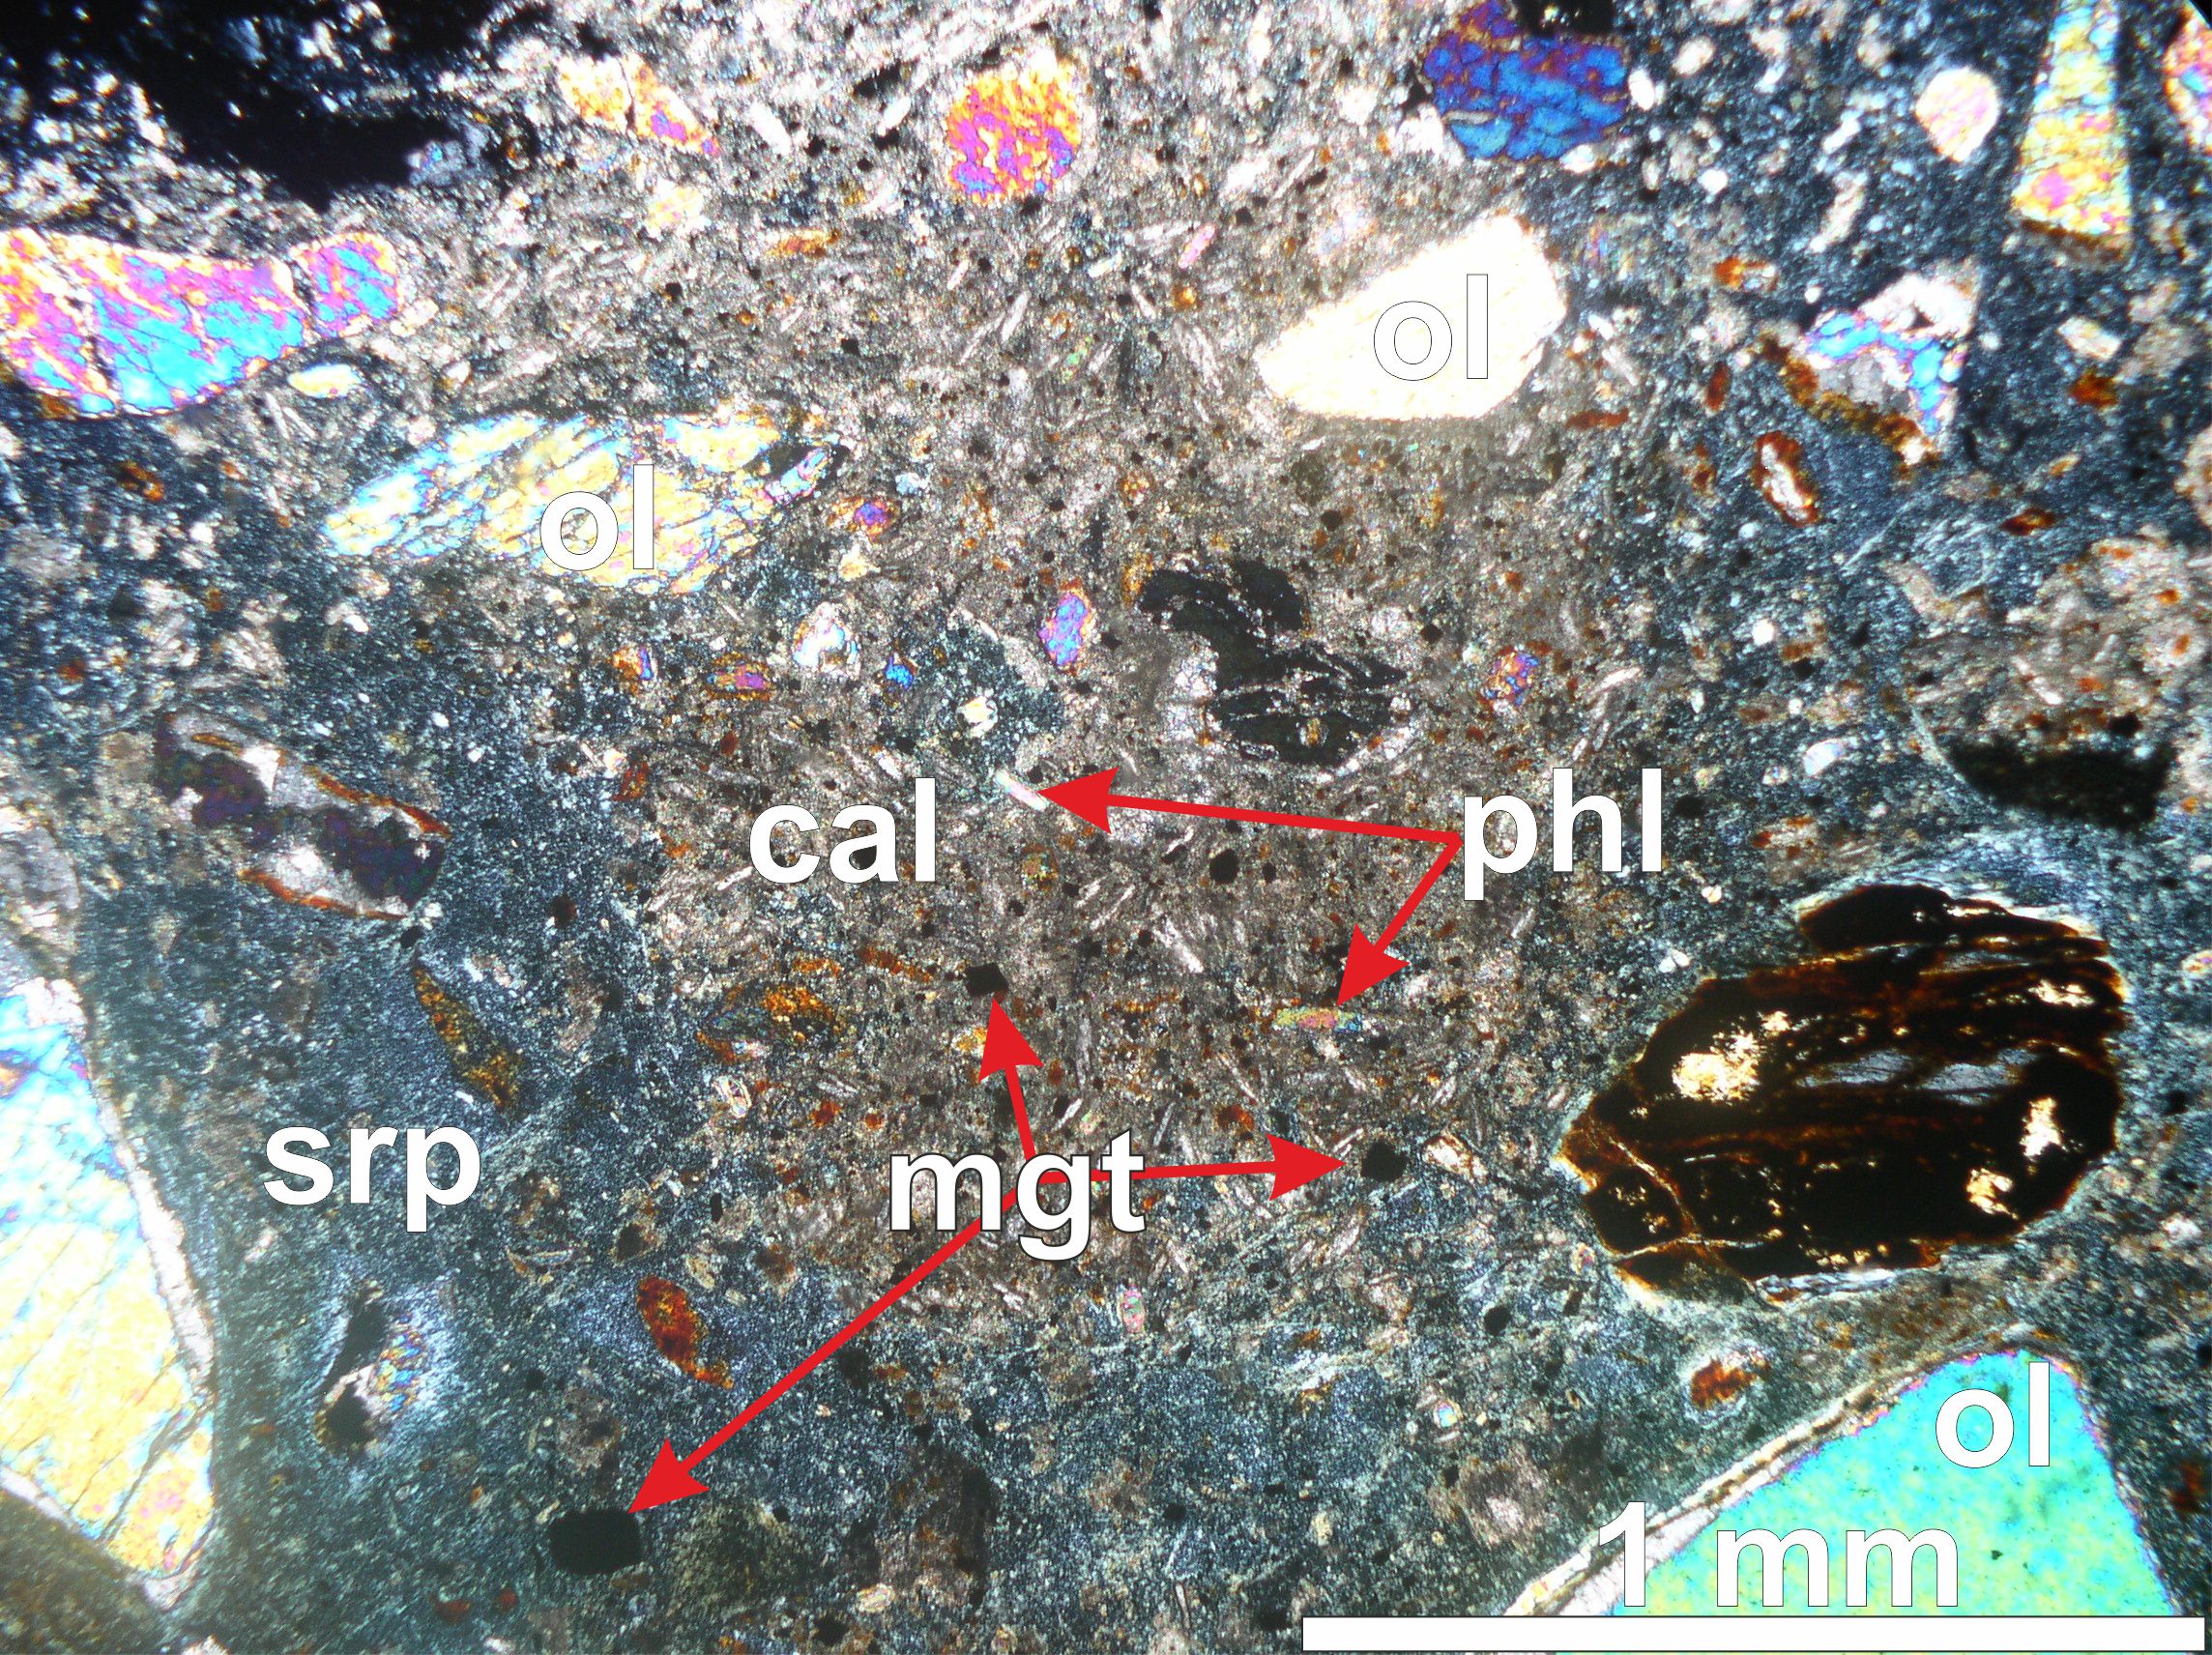

Supplement: s1 [file s1 › Fig. s2-2. Photo of thin section. Obnajennaya pipe, sample 7-243 (PPL). PK.jpg]

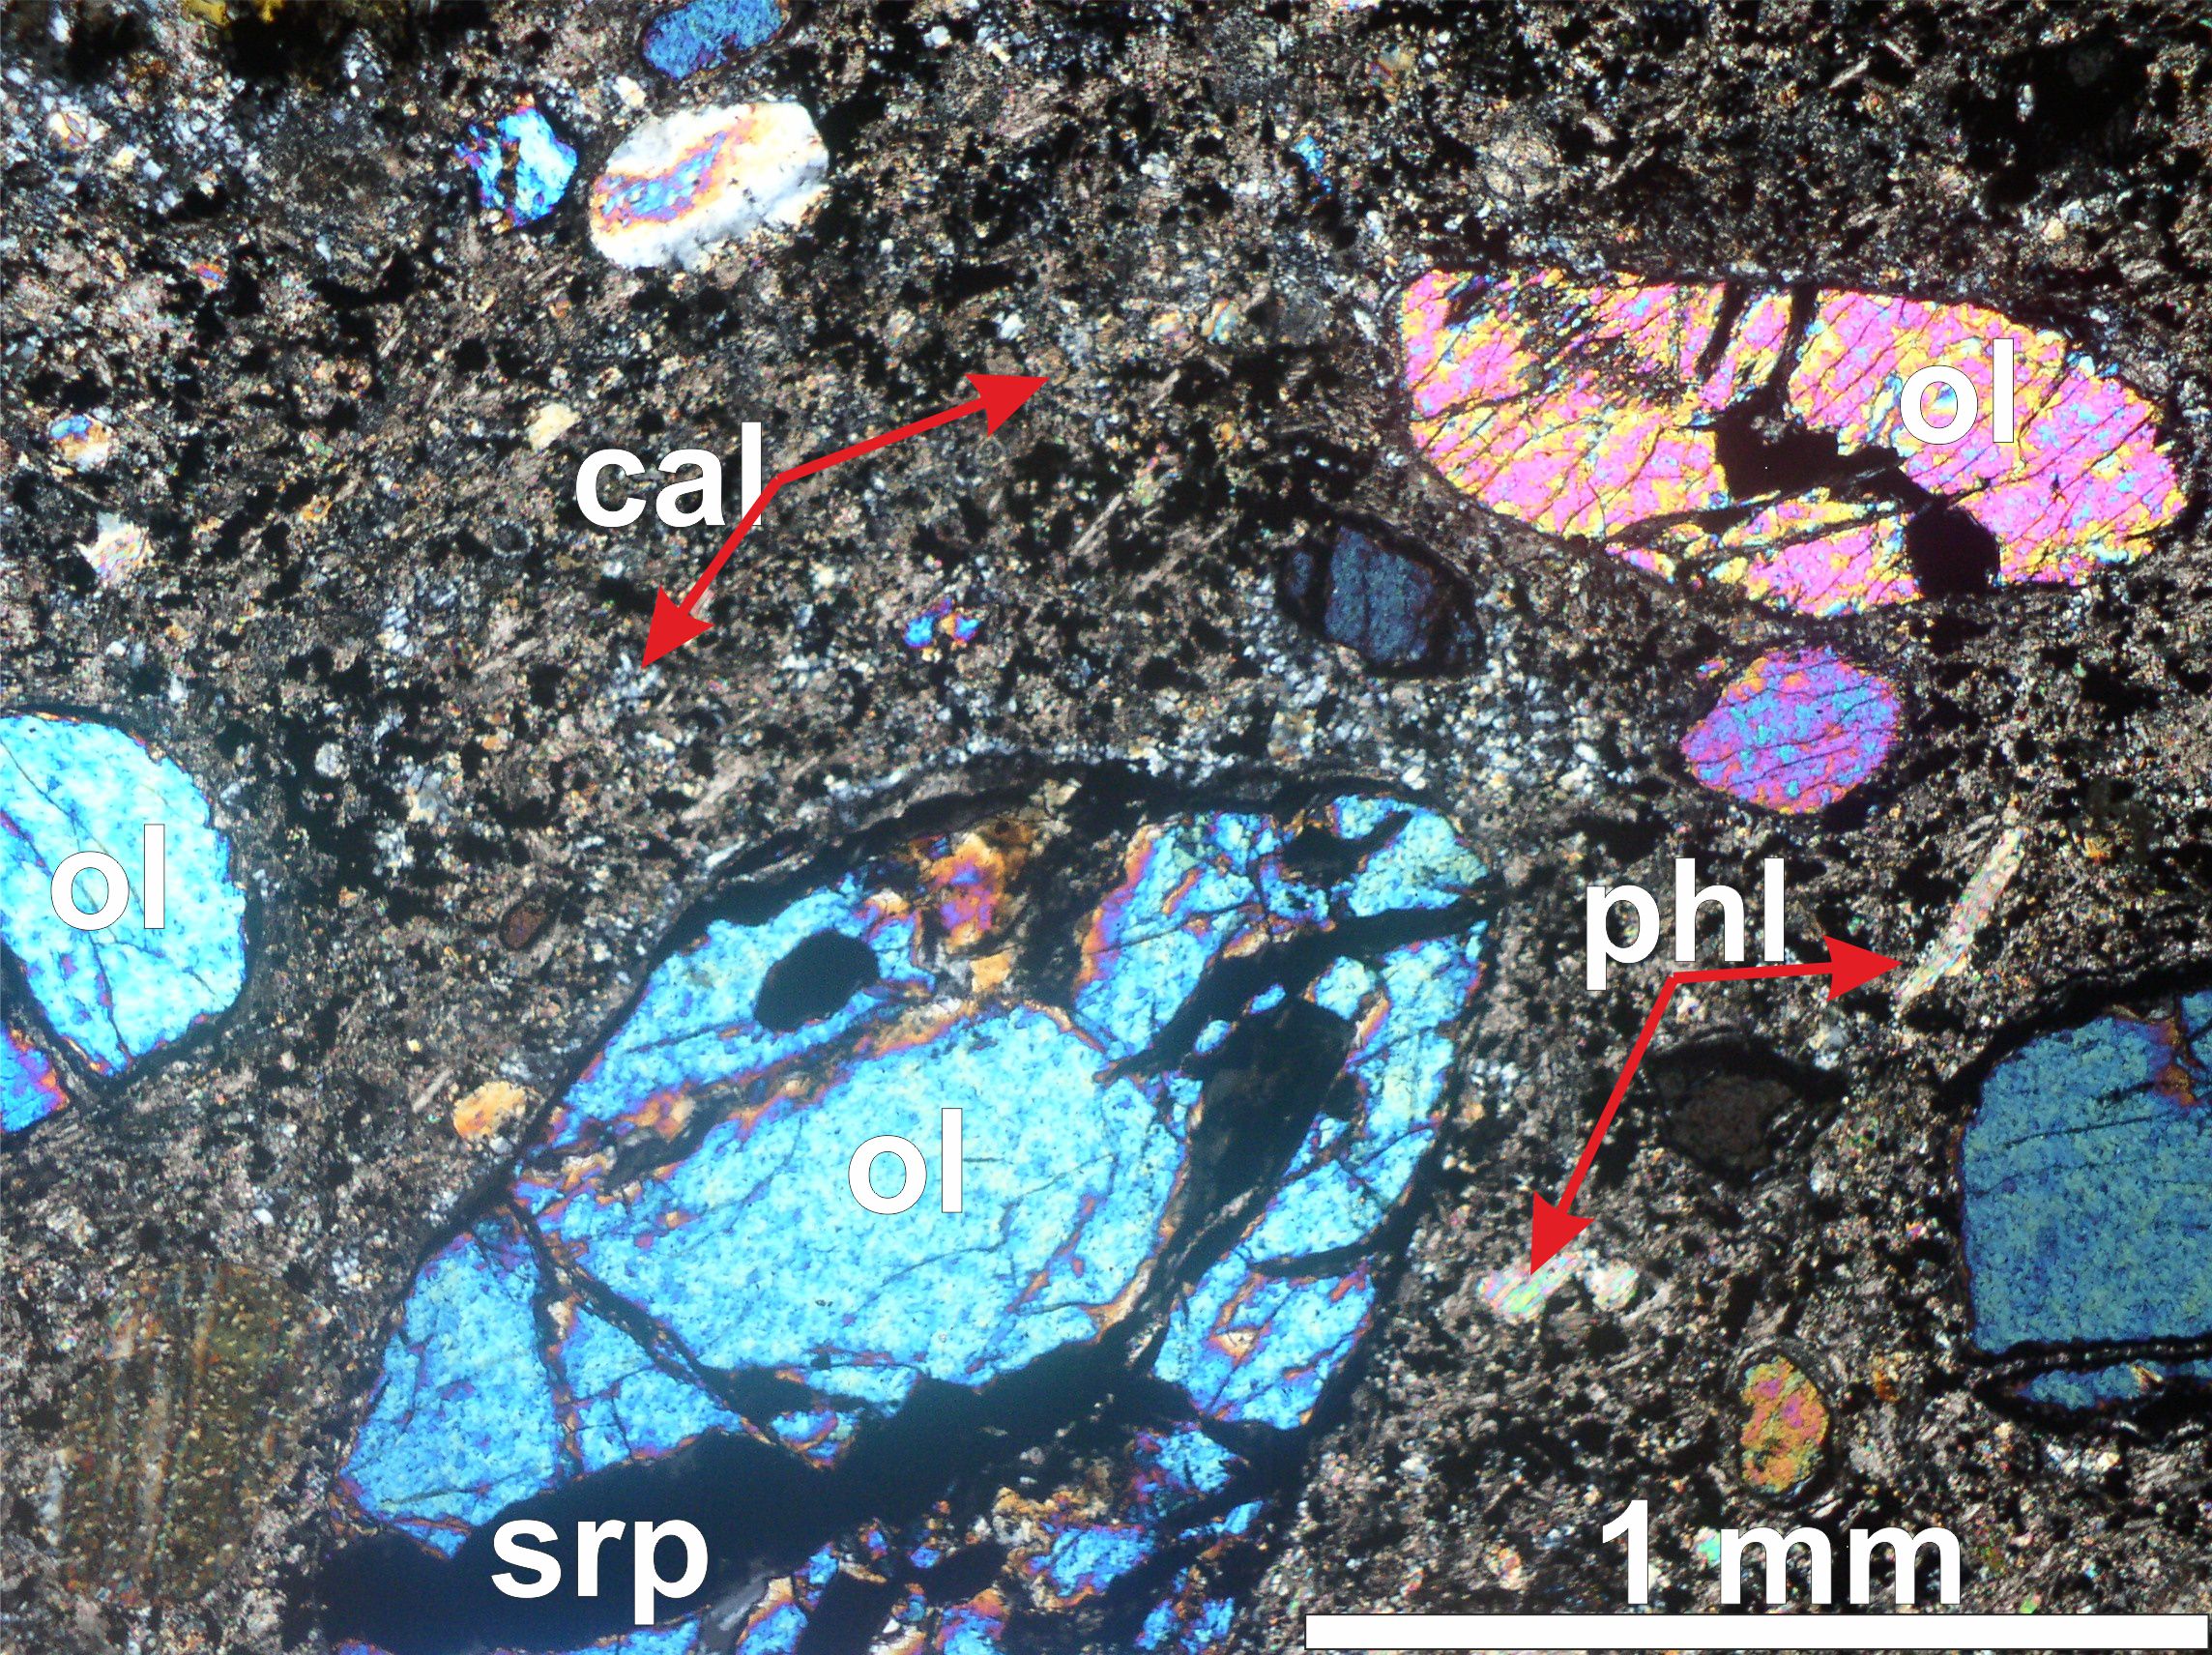

Supplement: s1 [file s1 › Fig. s2-3 Photo of thin section. Obnajennaya pipe, sample 7-325. CK.jpg]

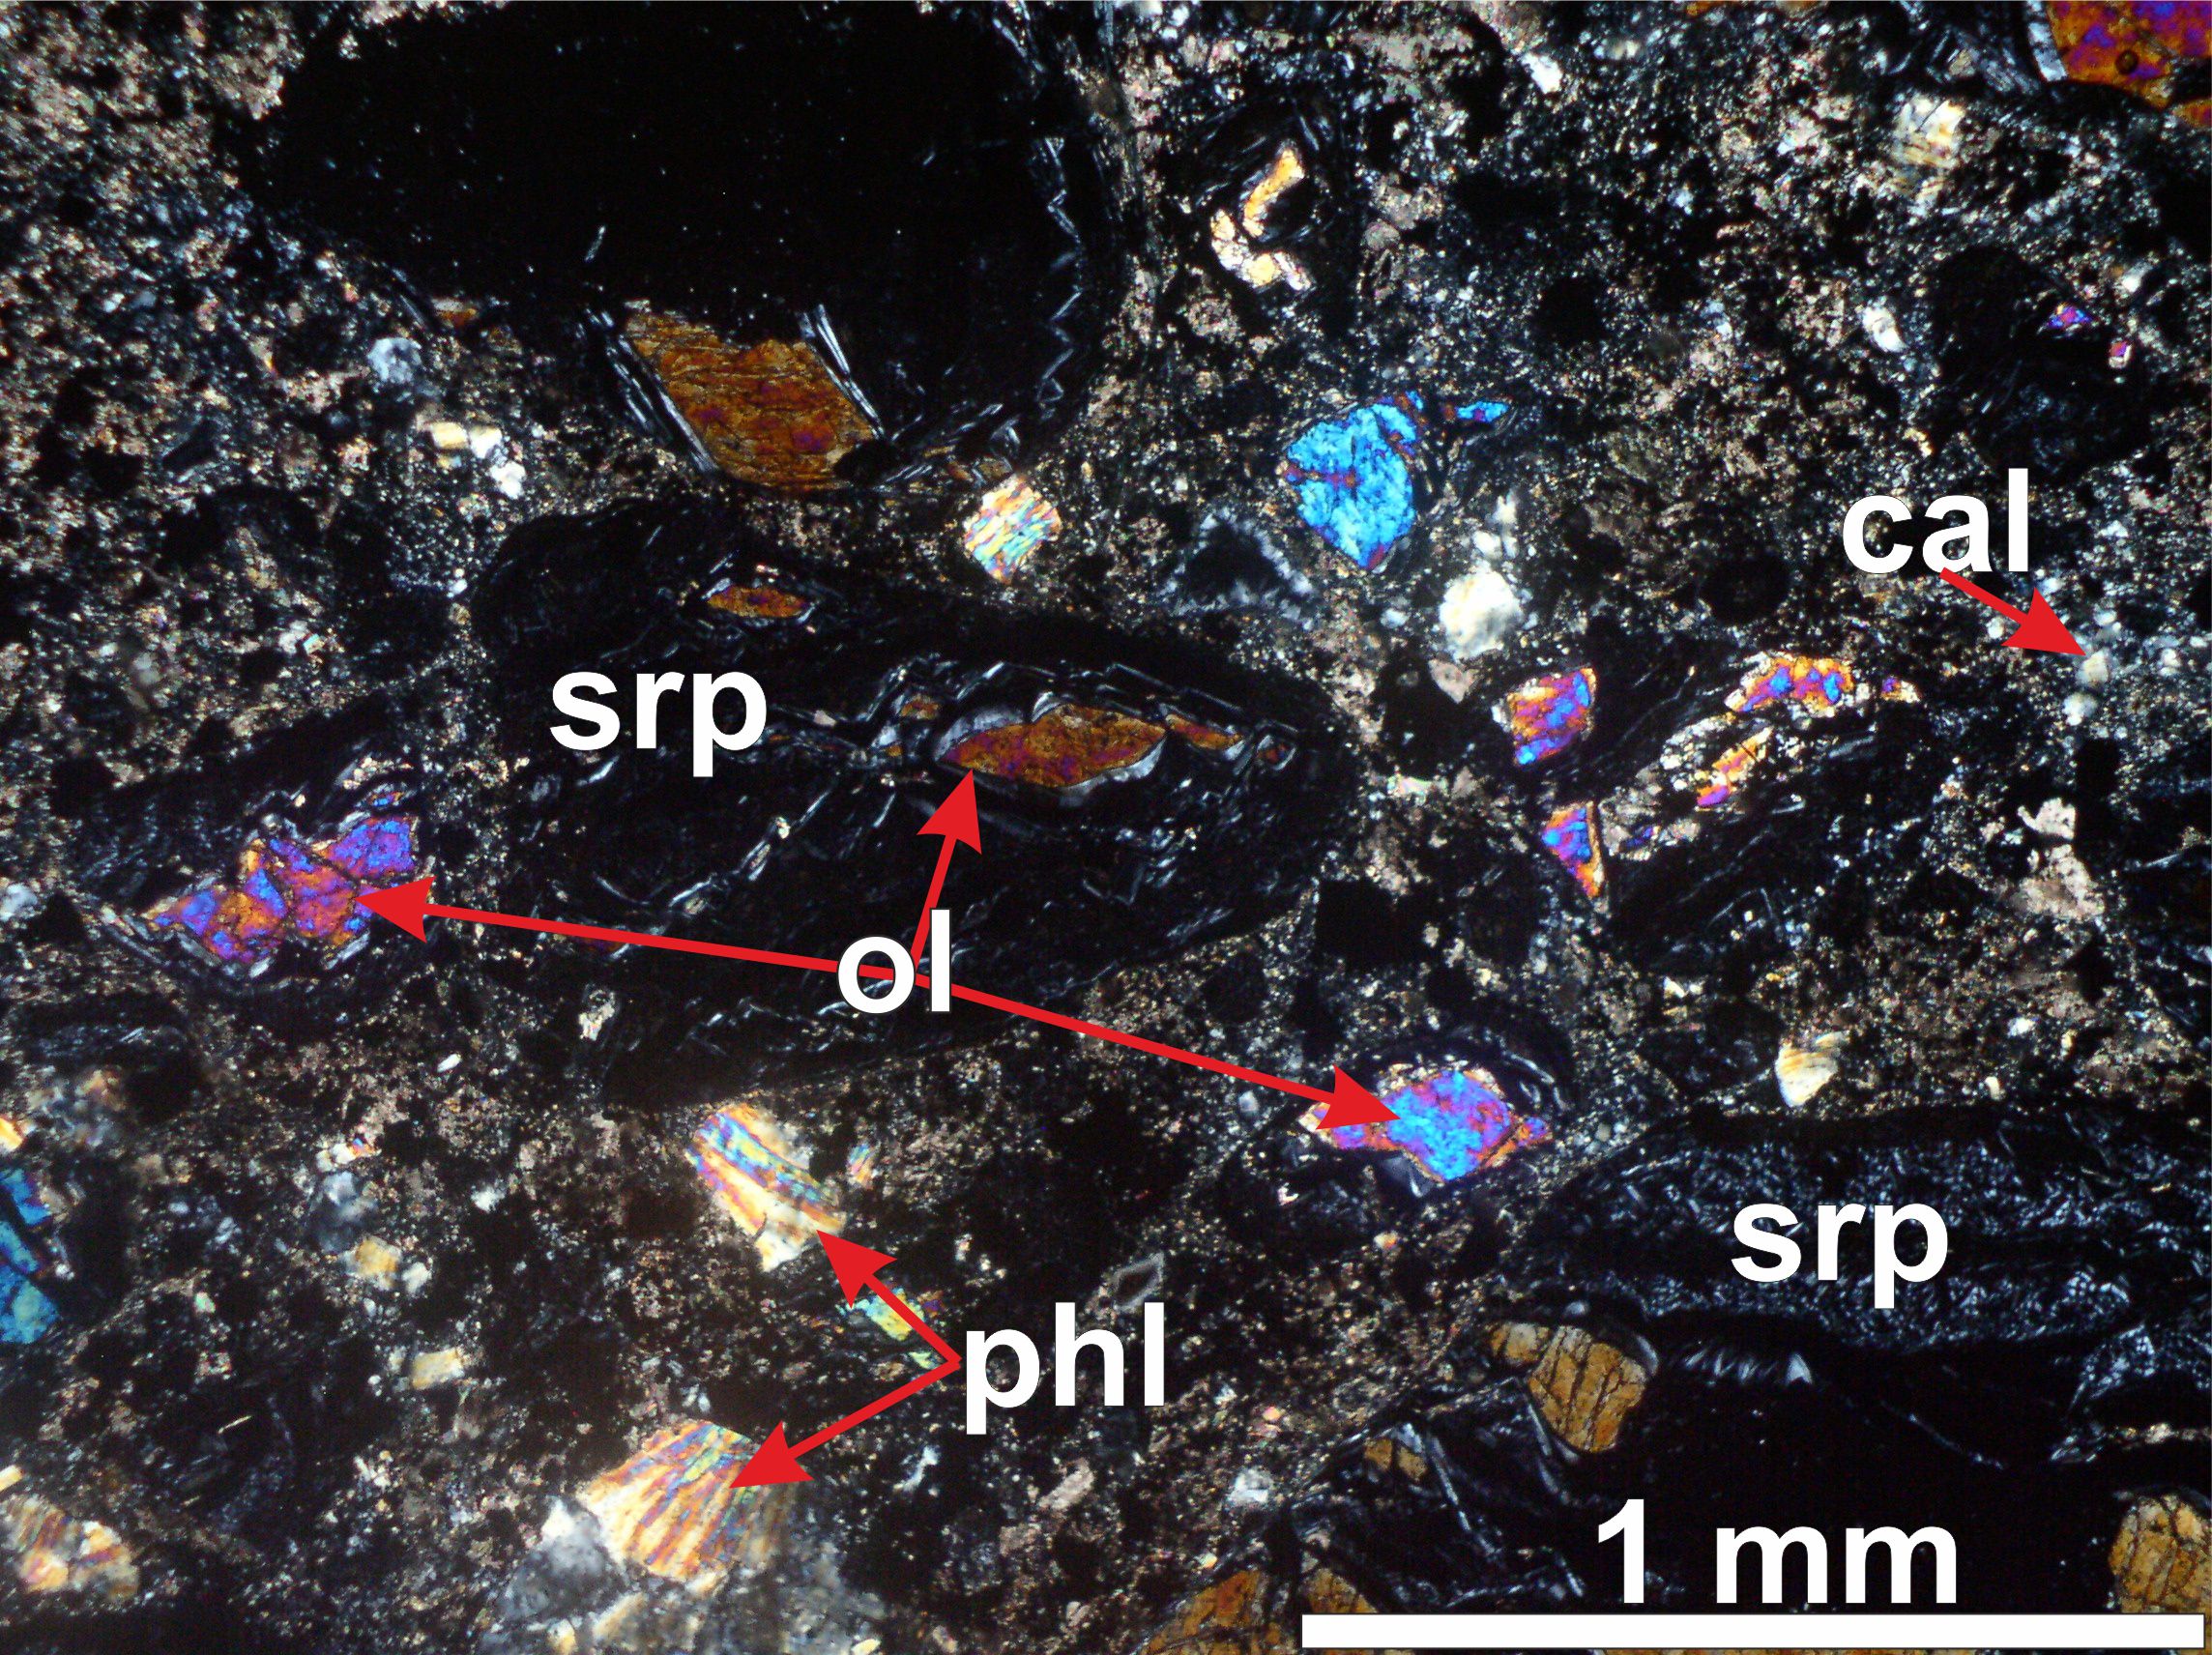

Supplement: s1 [file s1 › Fig. s2.Photo of thin section. Obnajennaya pipe, sample 7-234 (plane polarized light, PPL)..jpg]

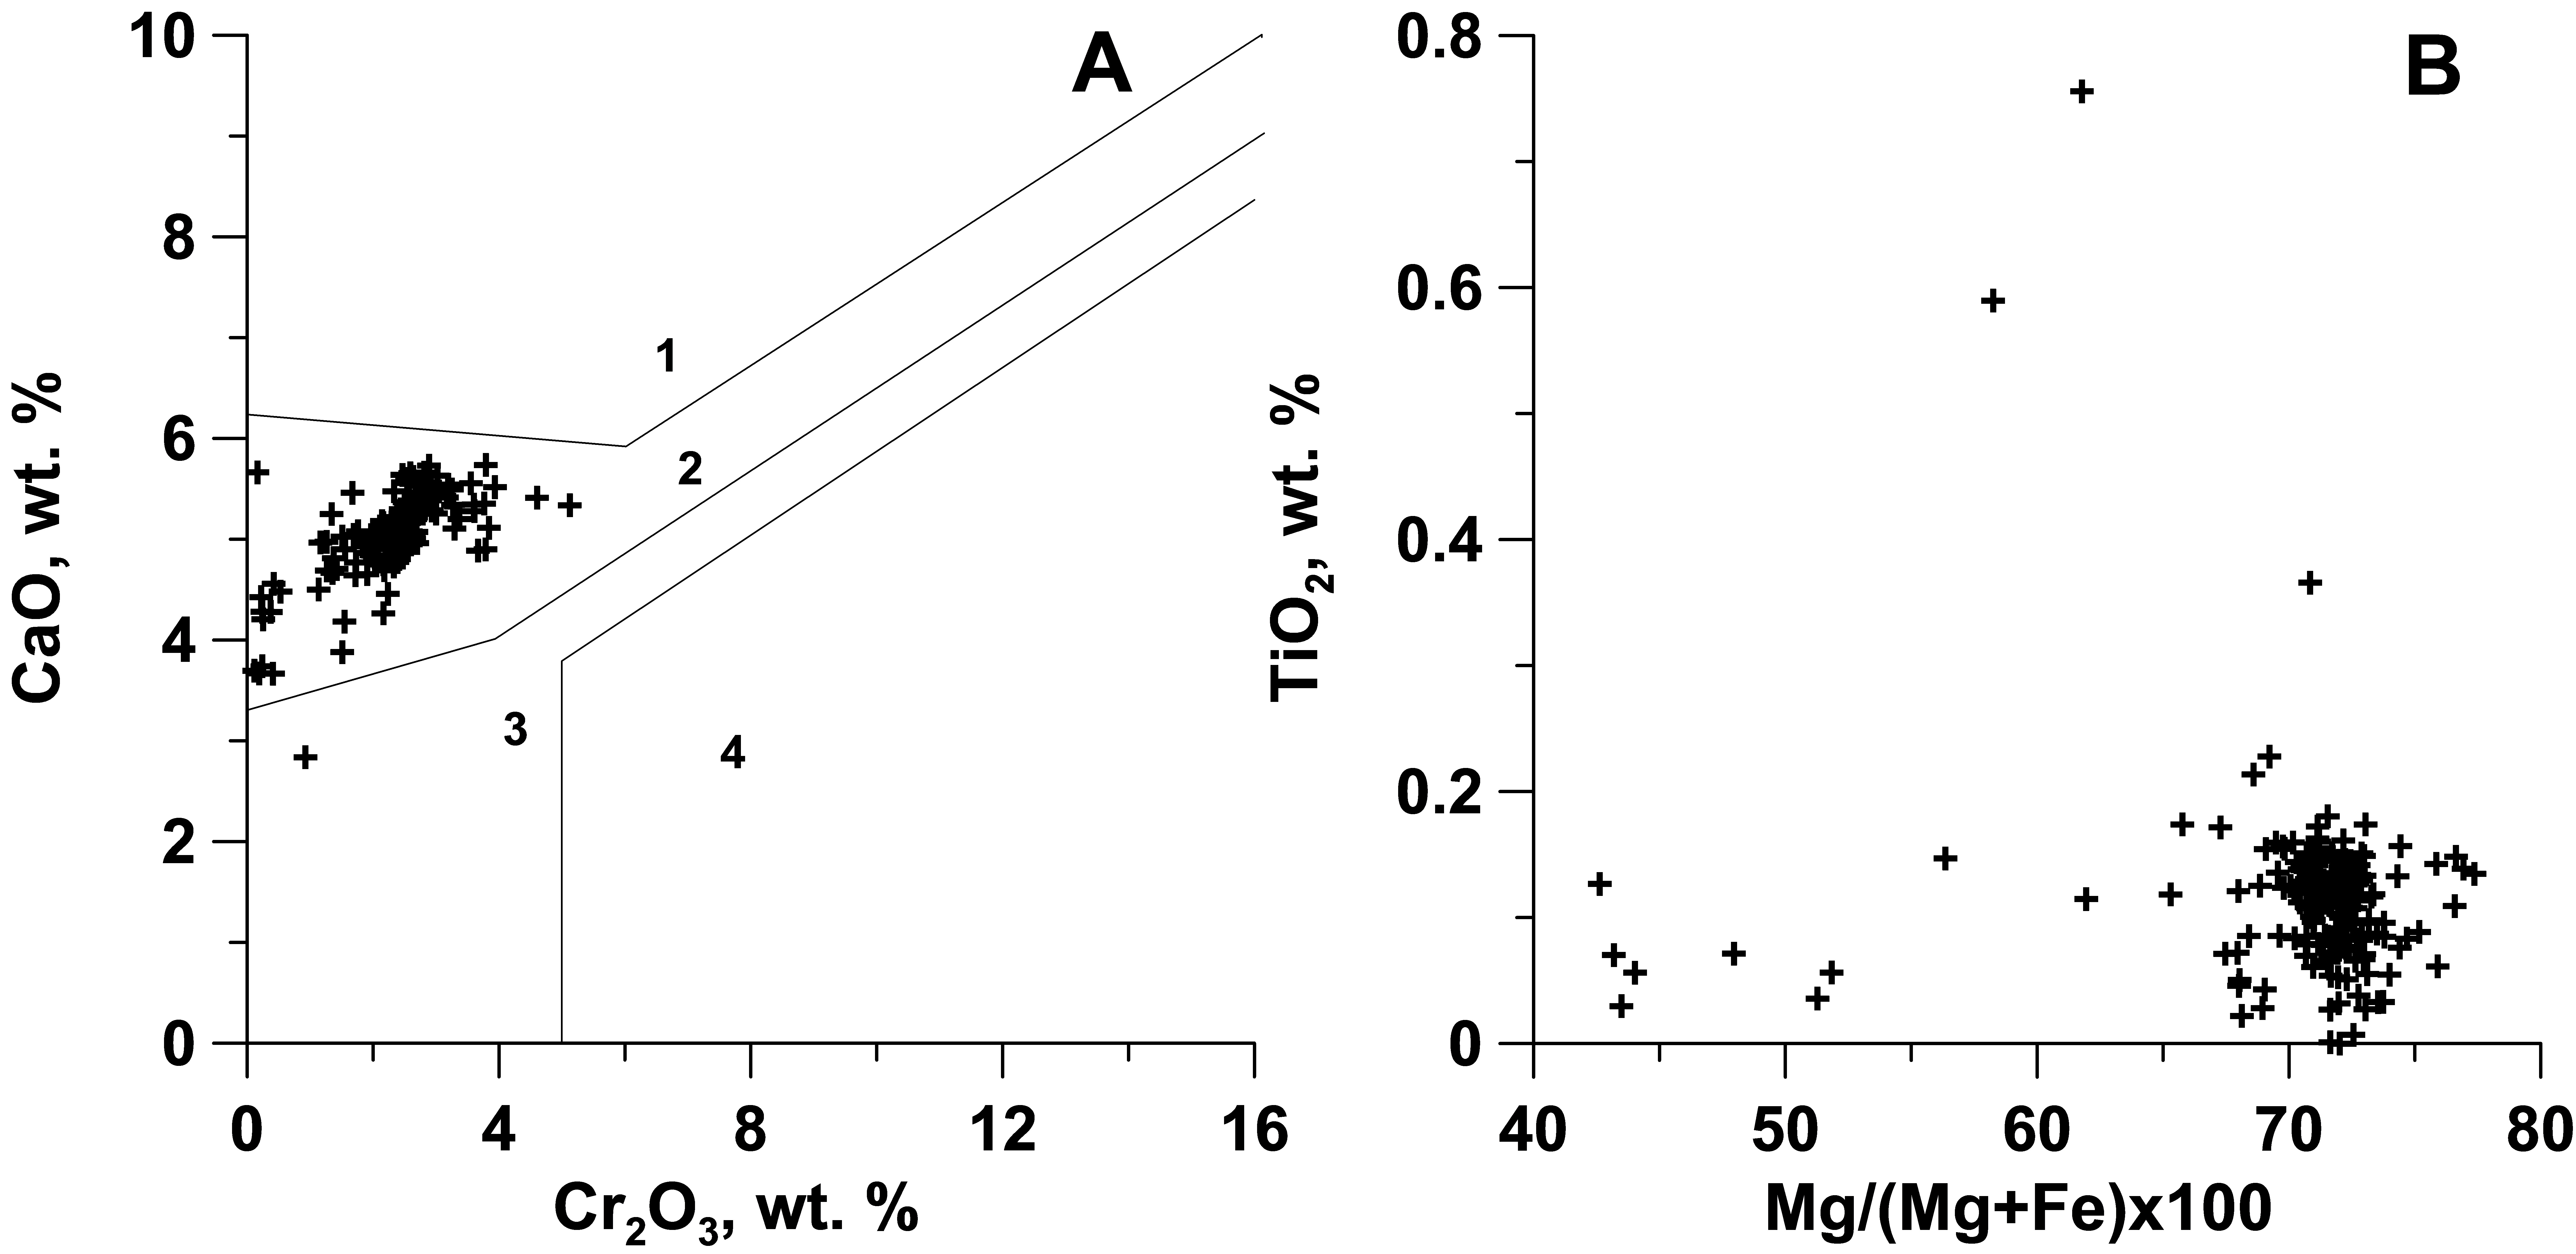

Supplement: s1 [file s1 › Fig. s3. CaO vs. Cr2O3 for garnet macrocrysts from Obnazhennaya.jpg]

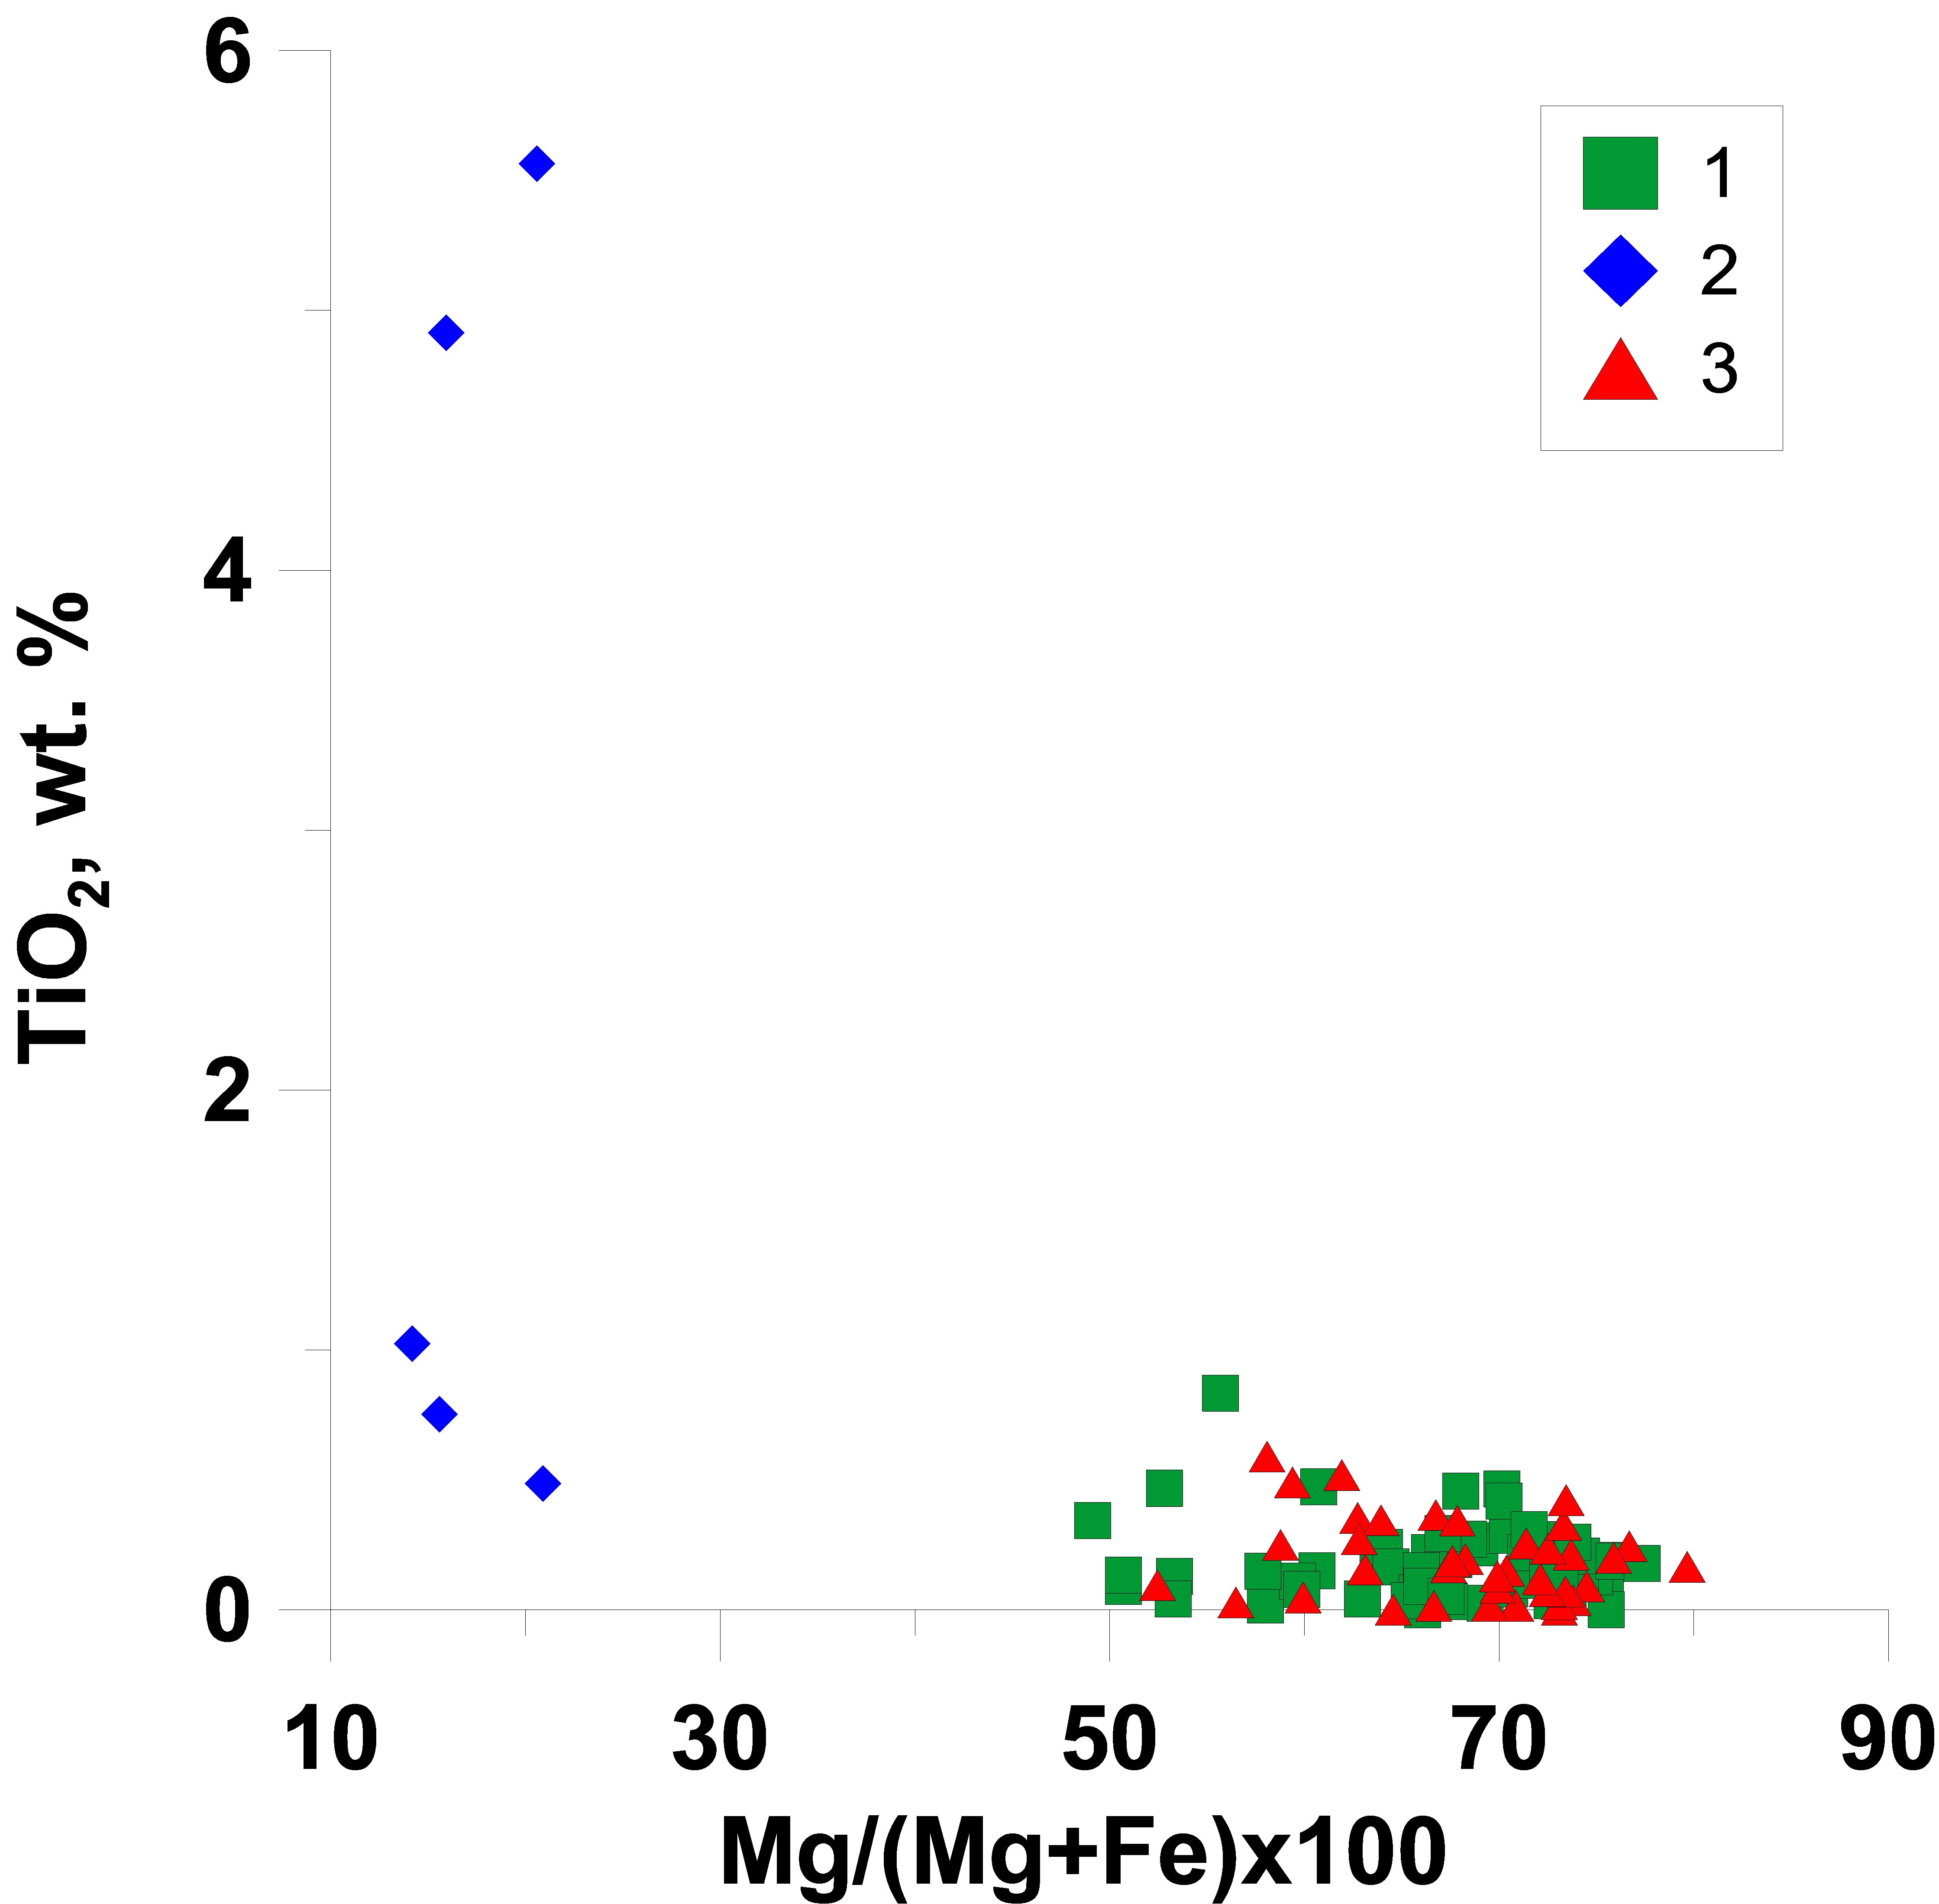

Supplement: s1 [file s1 › Fig. s4. Correlation diagrams for spinel.jpg]

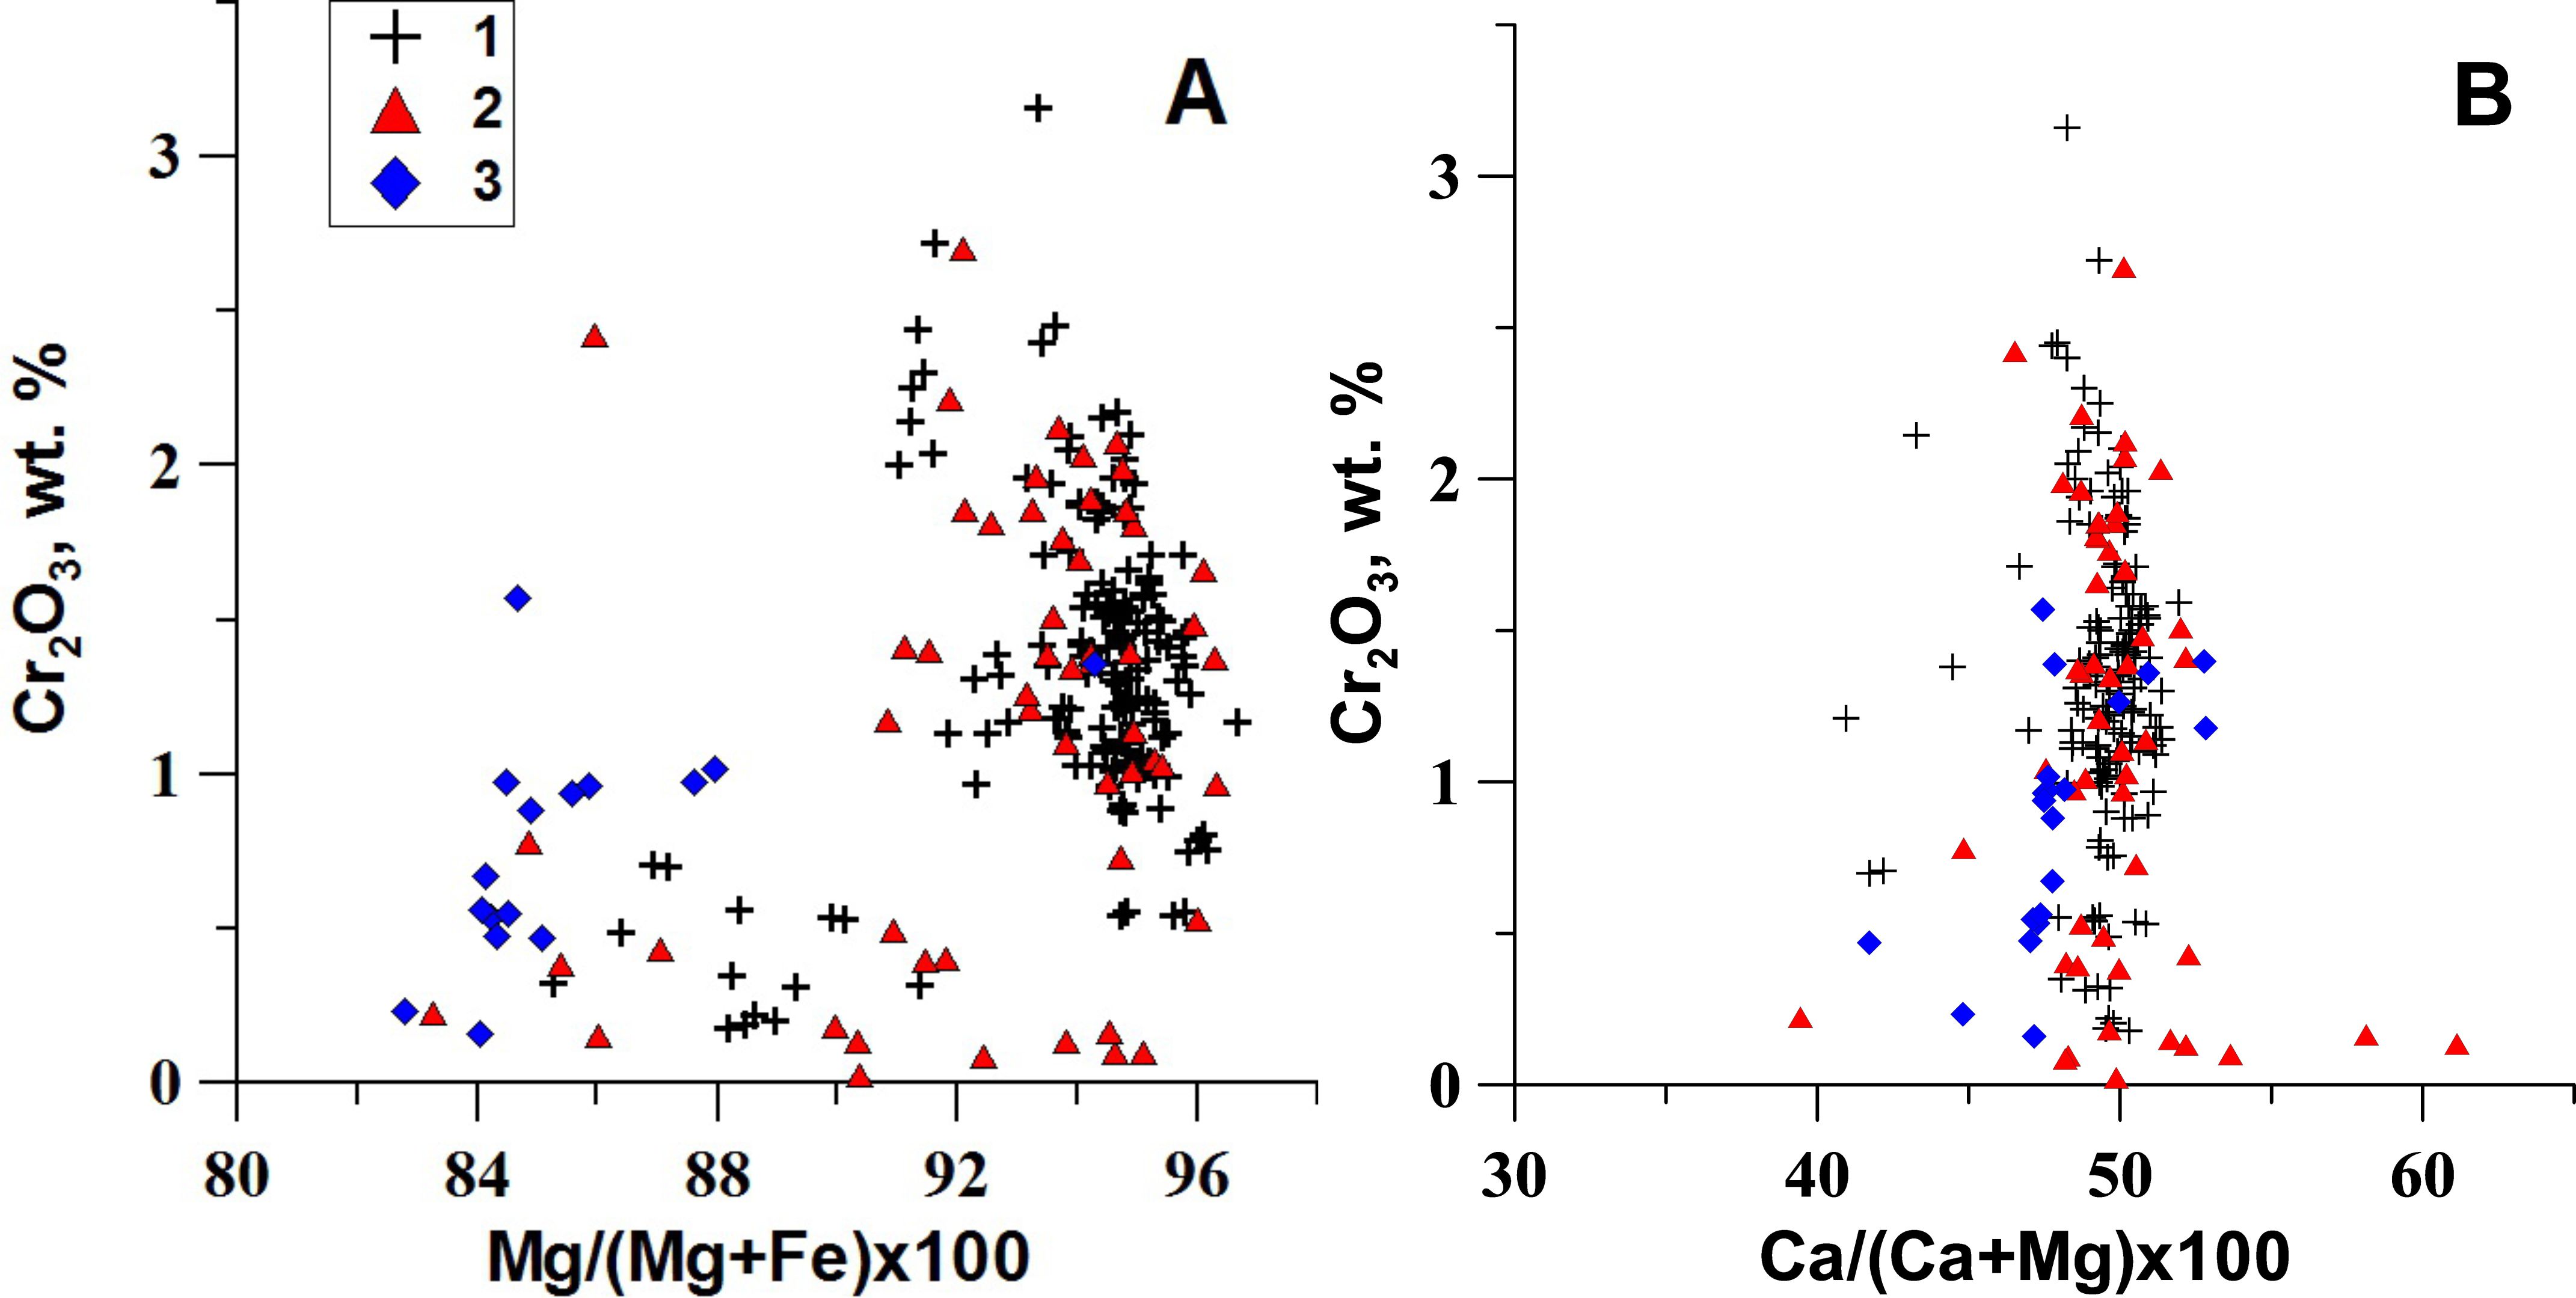

Supplement: s1 [file s1 › Fig. s5. Correlation diagrams for clinopyroxenes.jpg]

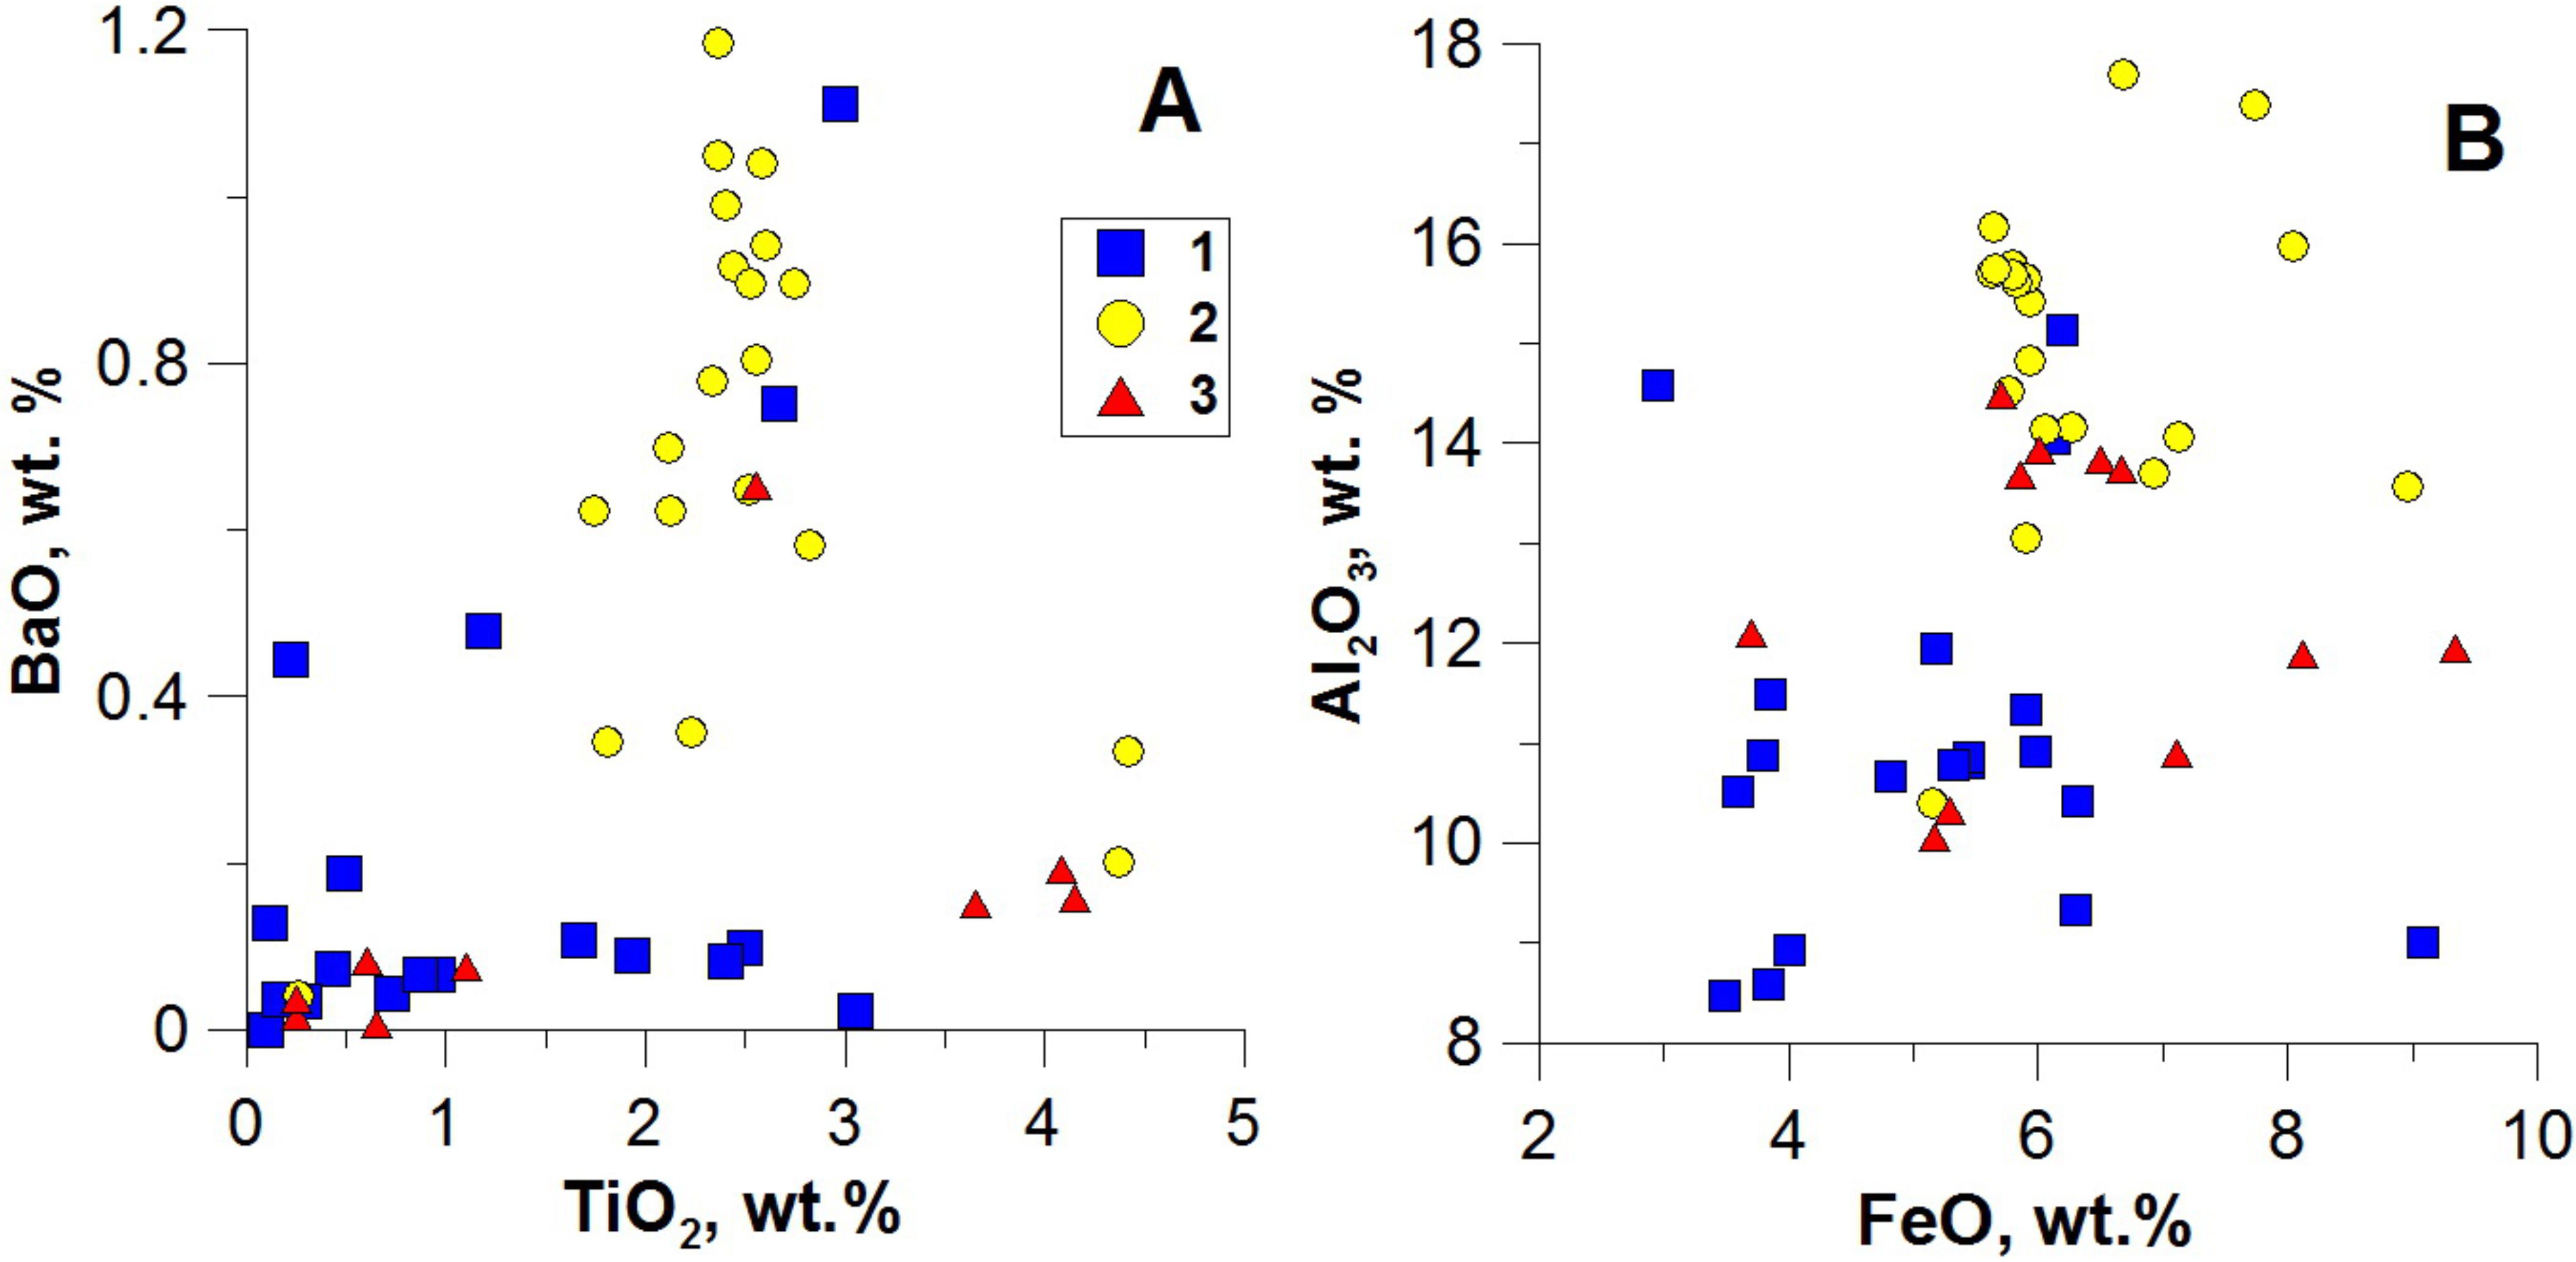

Supplement: s1 [file s1 › Fig. s6. Plots for groundmass phlogopite from Obnazhennaya kimberlite..jpg]

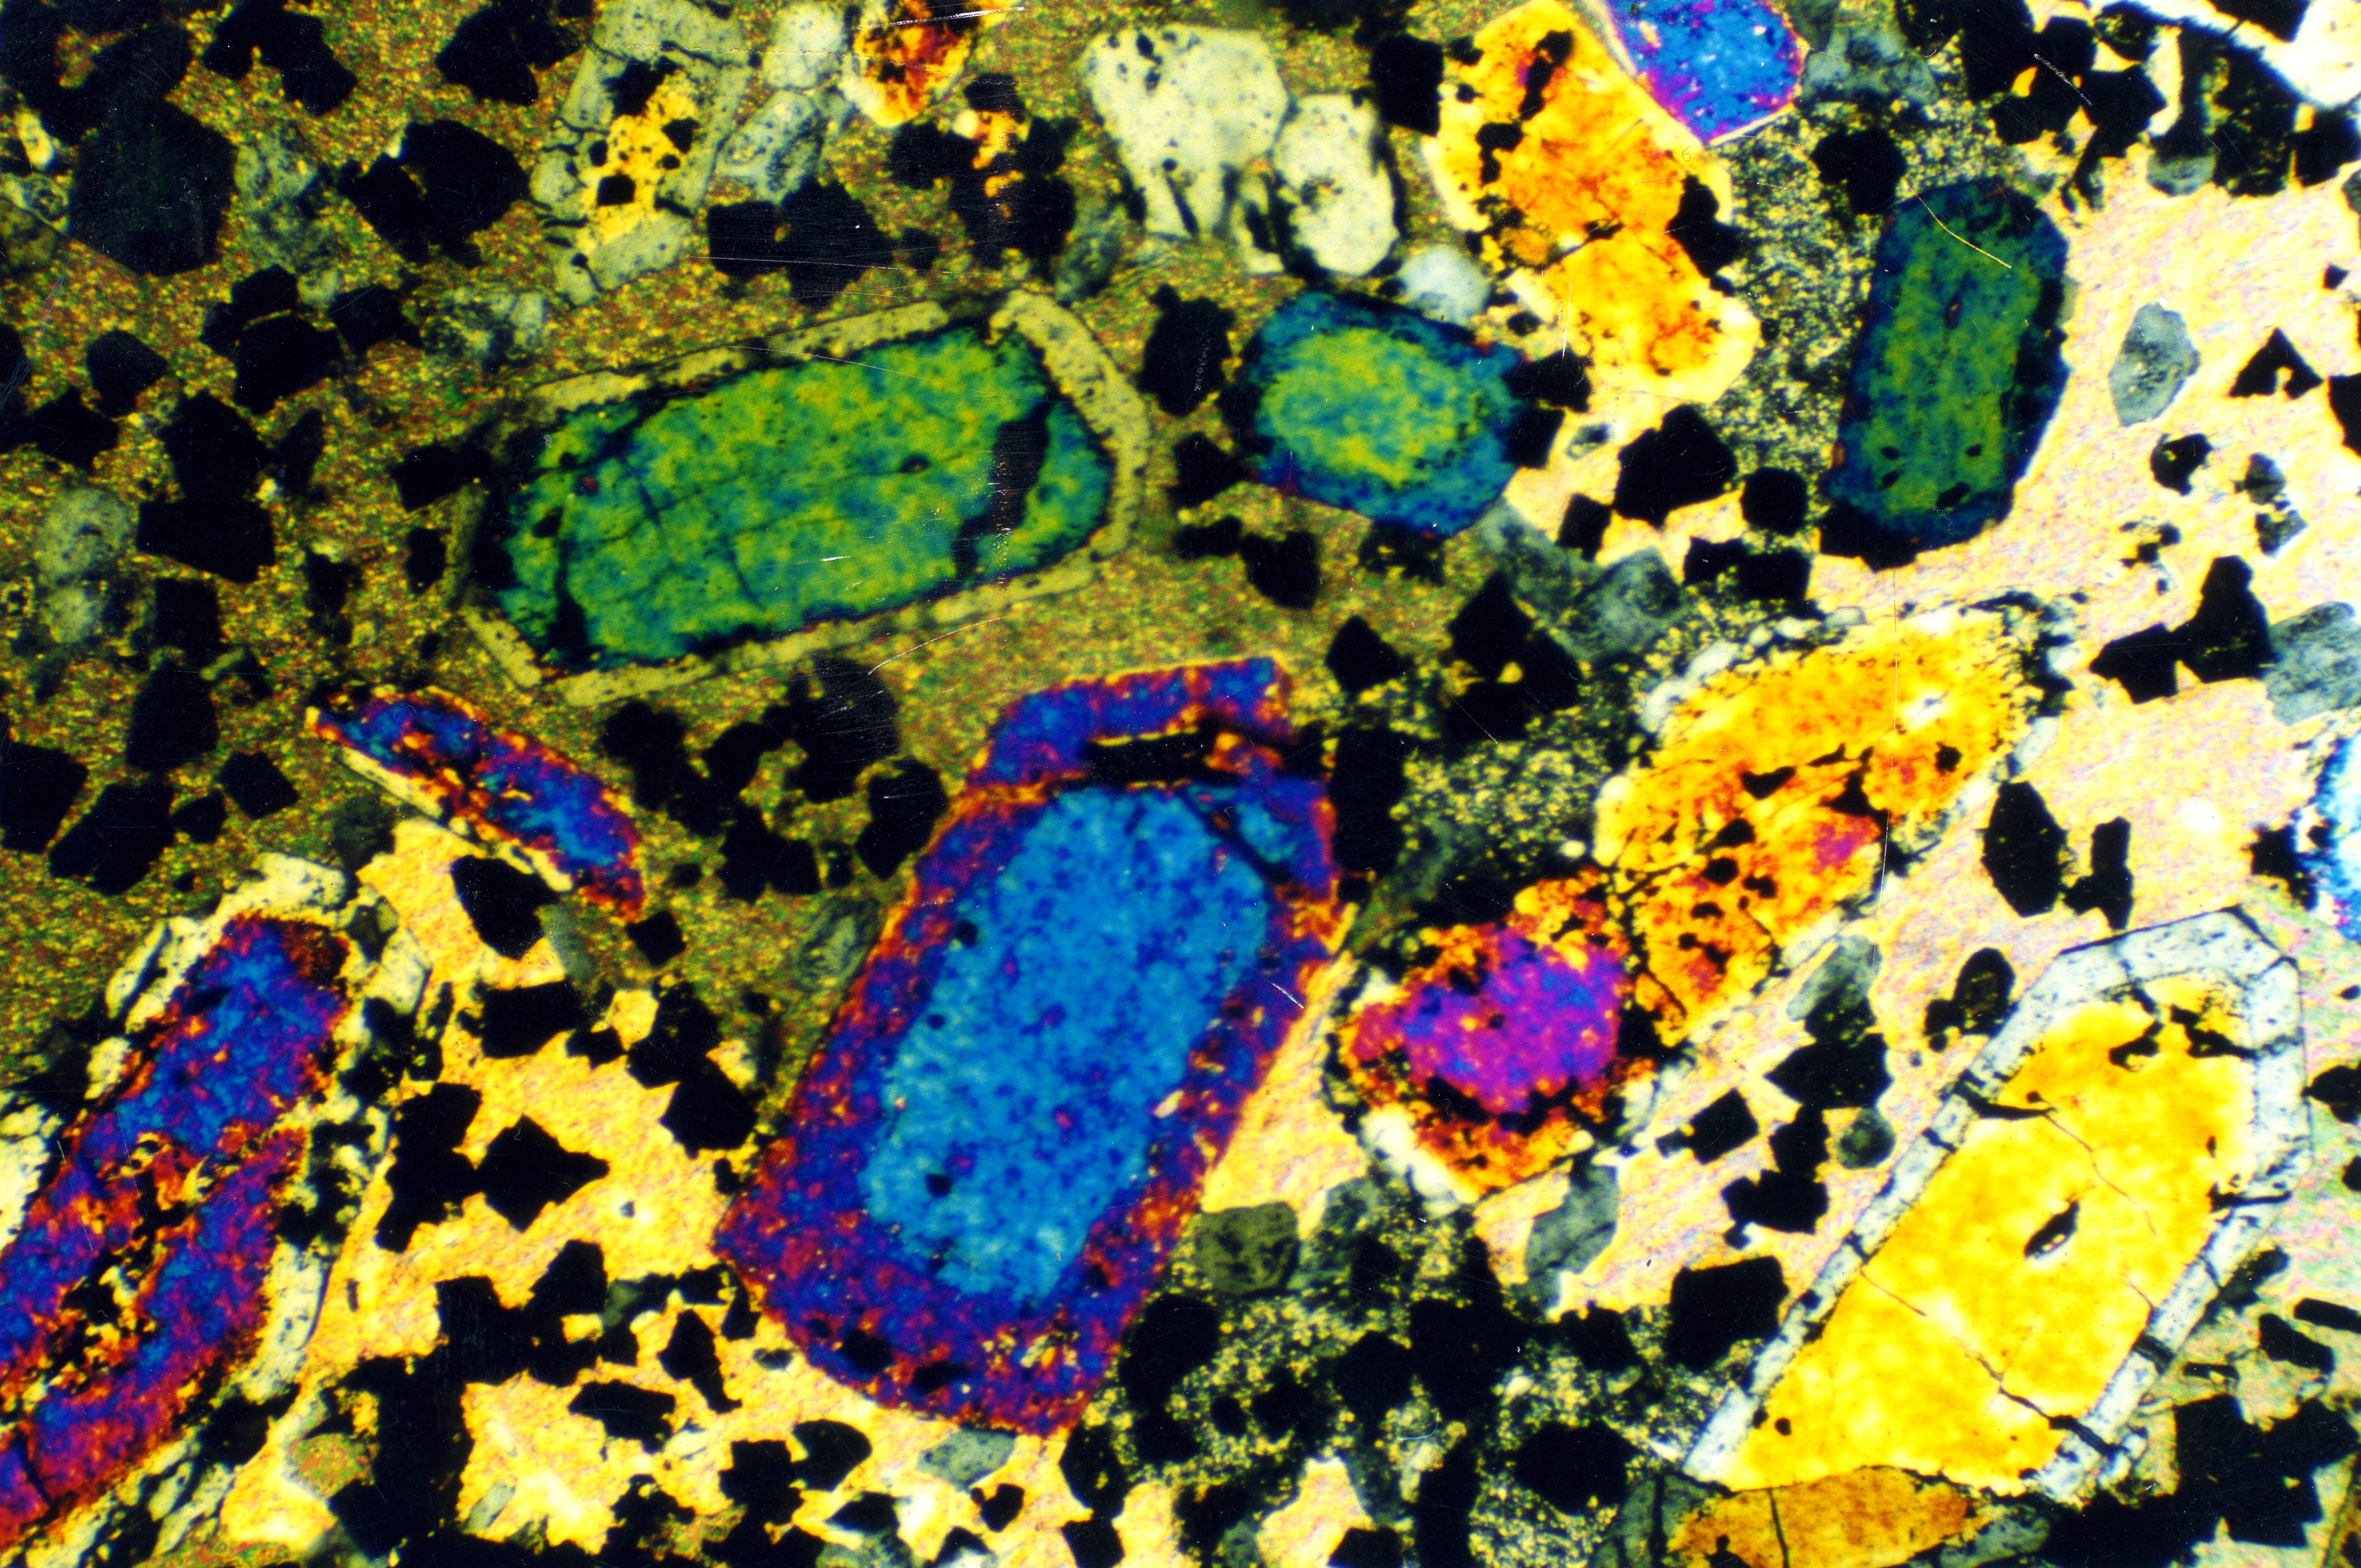

Supplement: s1 [file s1 › FIg. s8. Photo of thin section of sample 90-20 from Rudniy Dvor dyke.jpg]

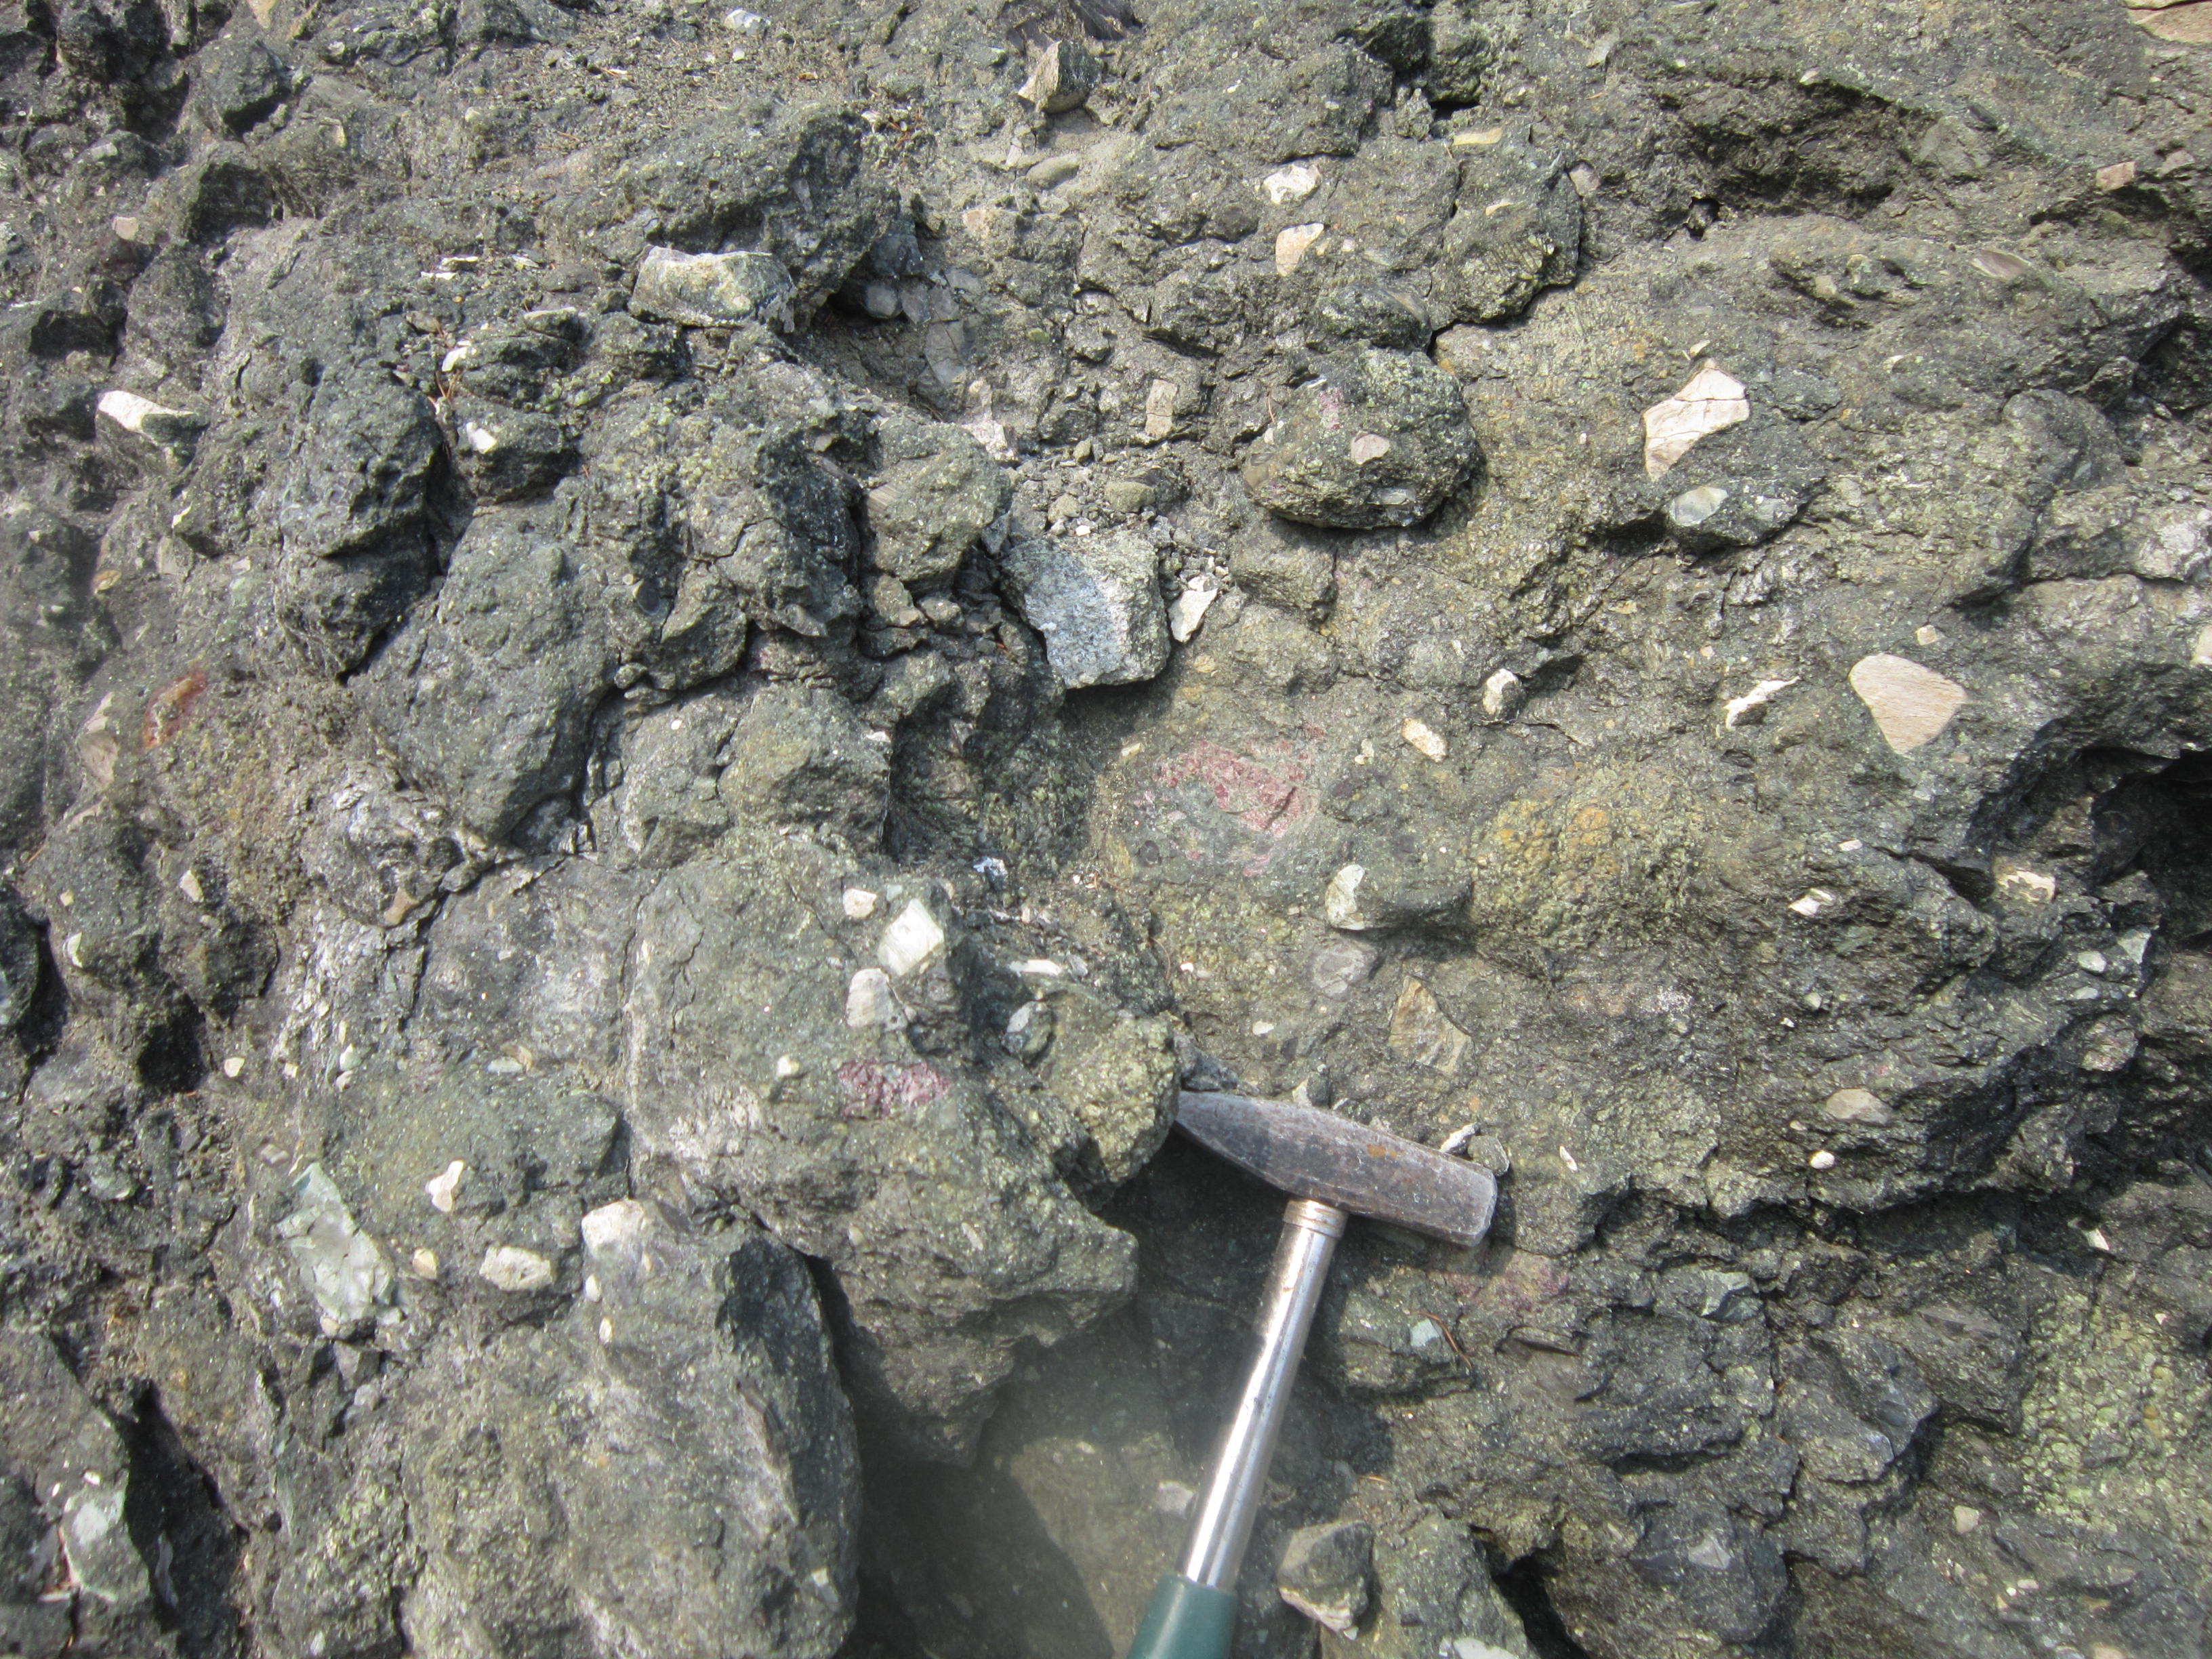

Supplement: s1 [file s1 › Pipe Obn 戙、ム猕獱瓲_徕キ獱 of outcrop.JPG]

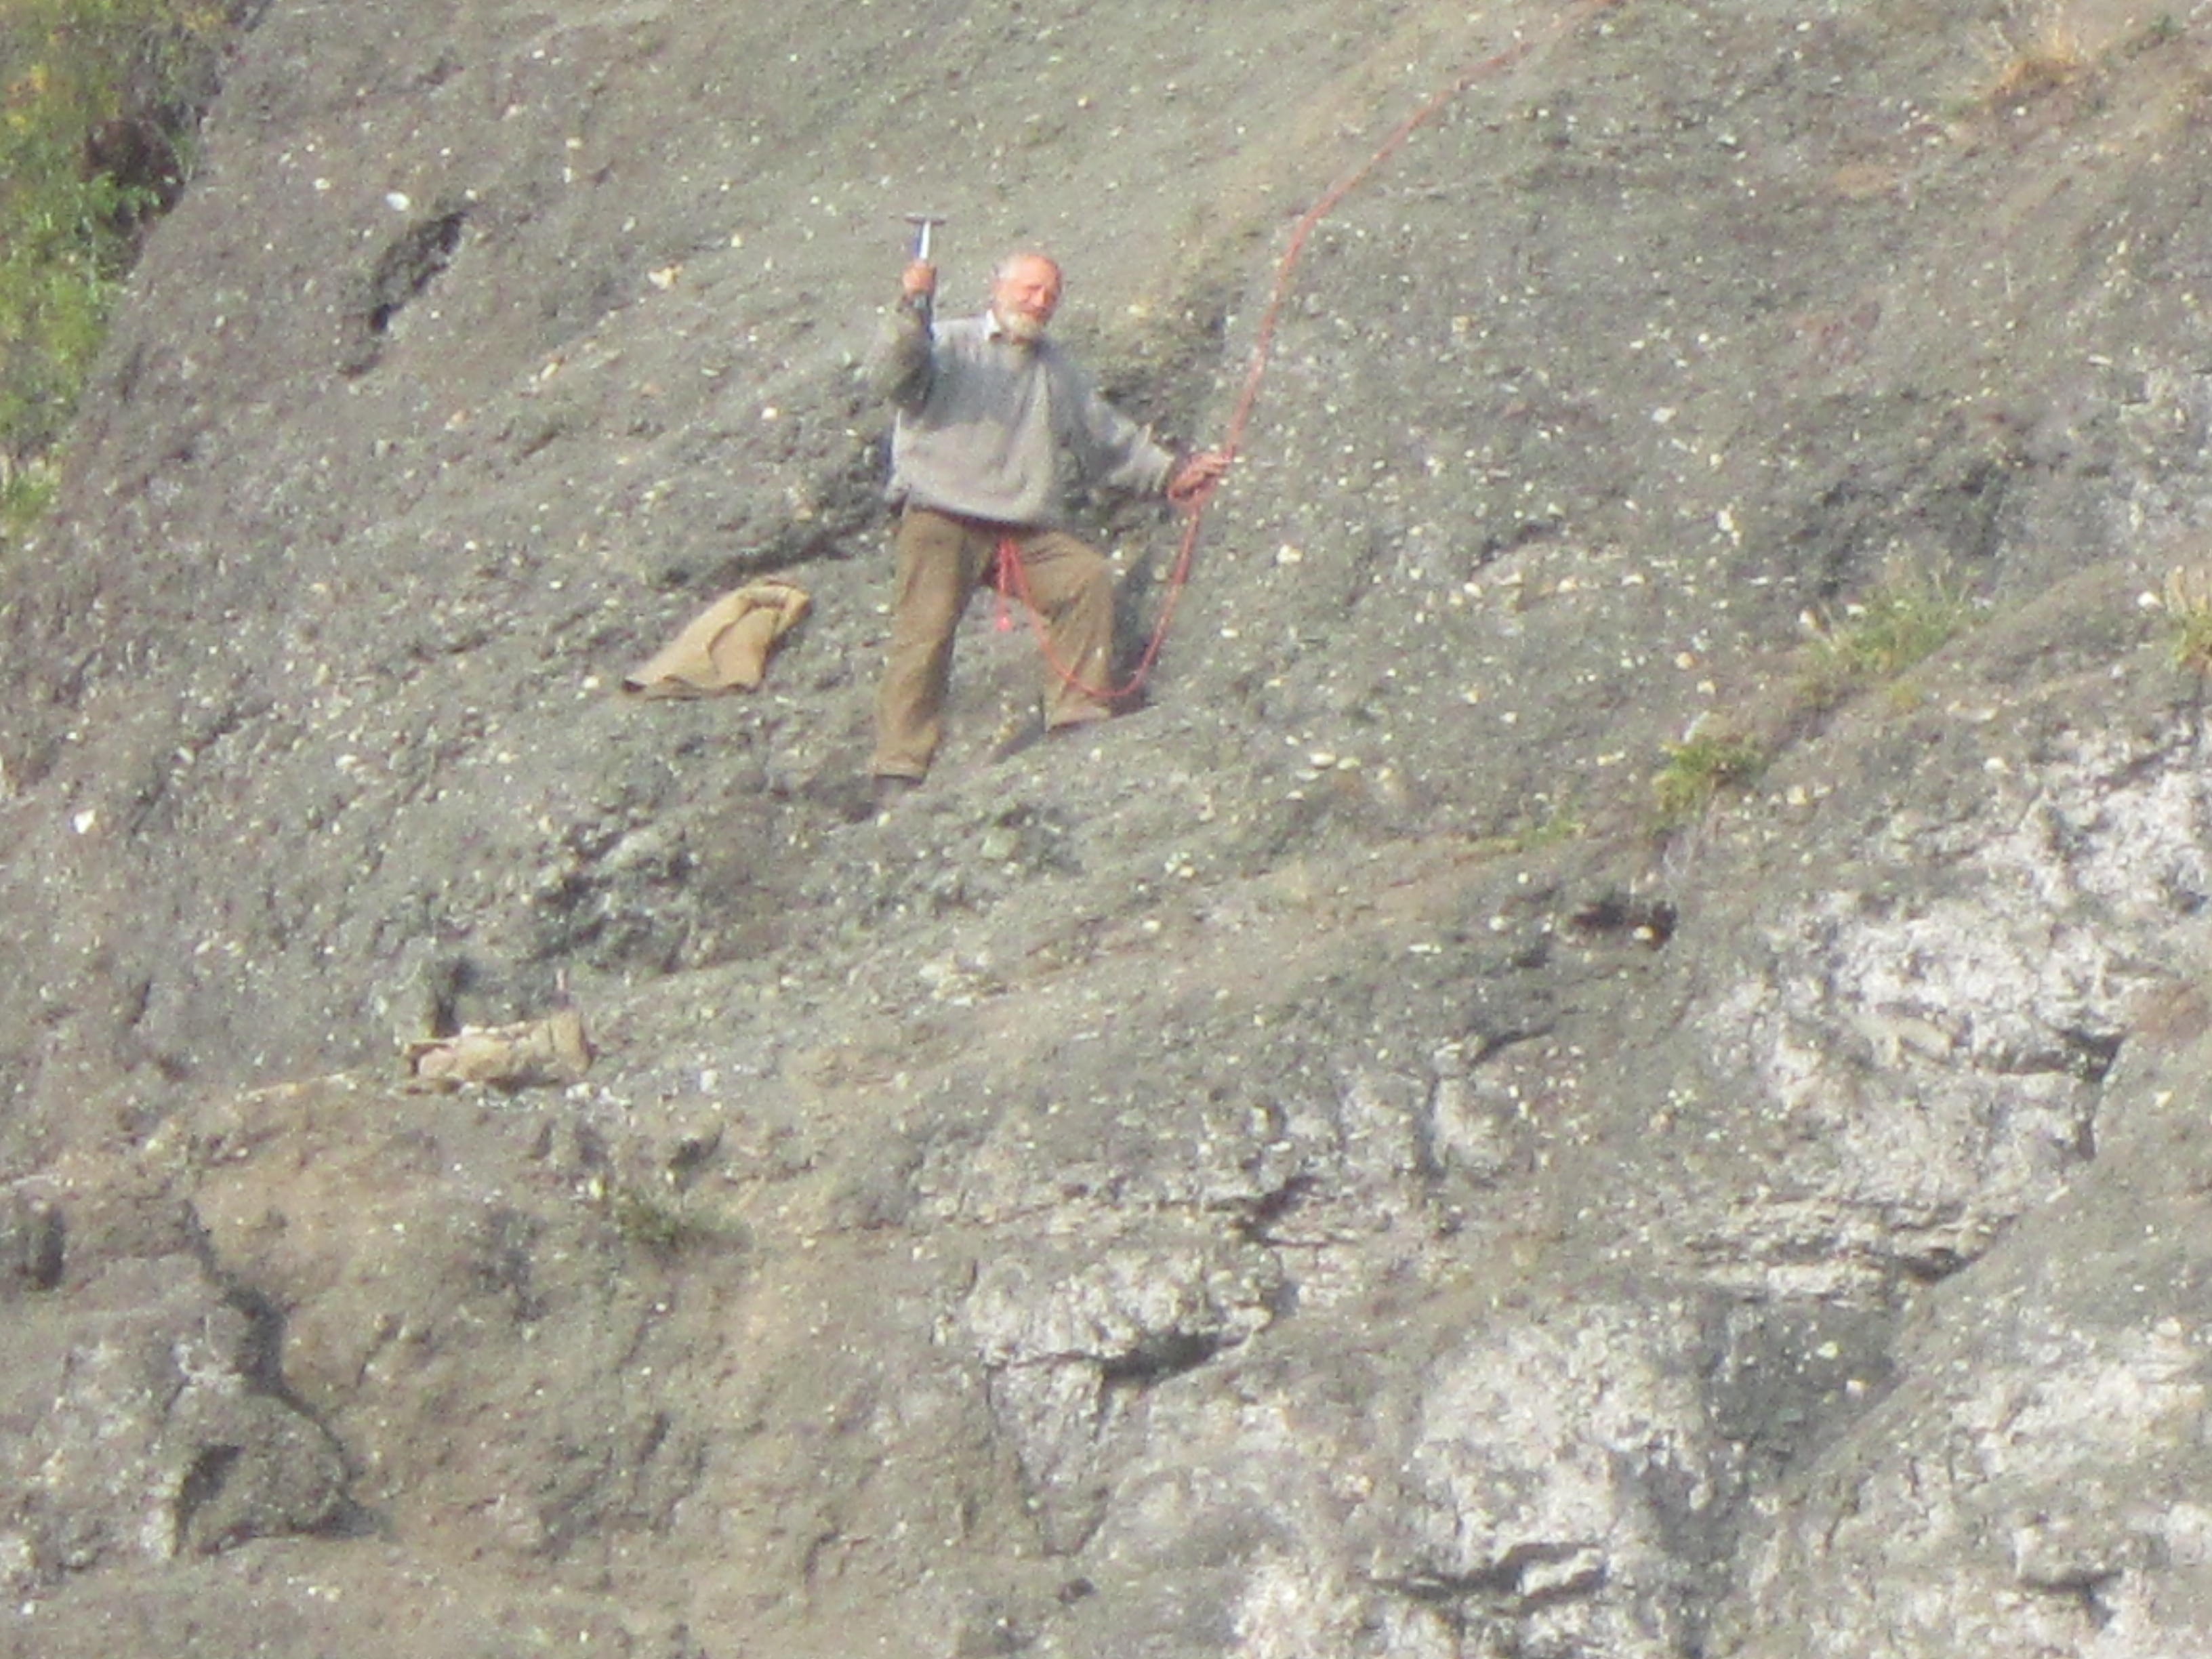

Supplement: s1 [file s1 › pipe Obnazhennaya 2012.JPG]

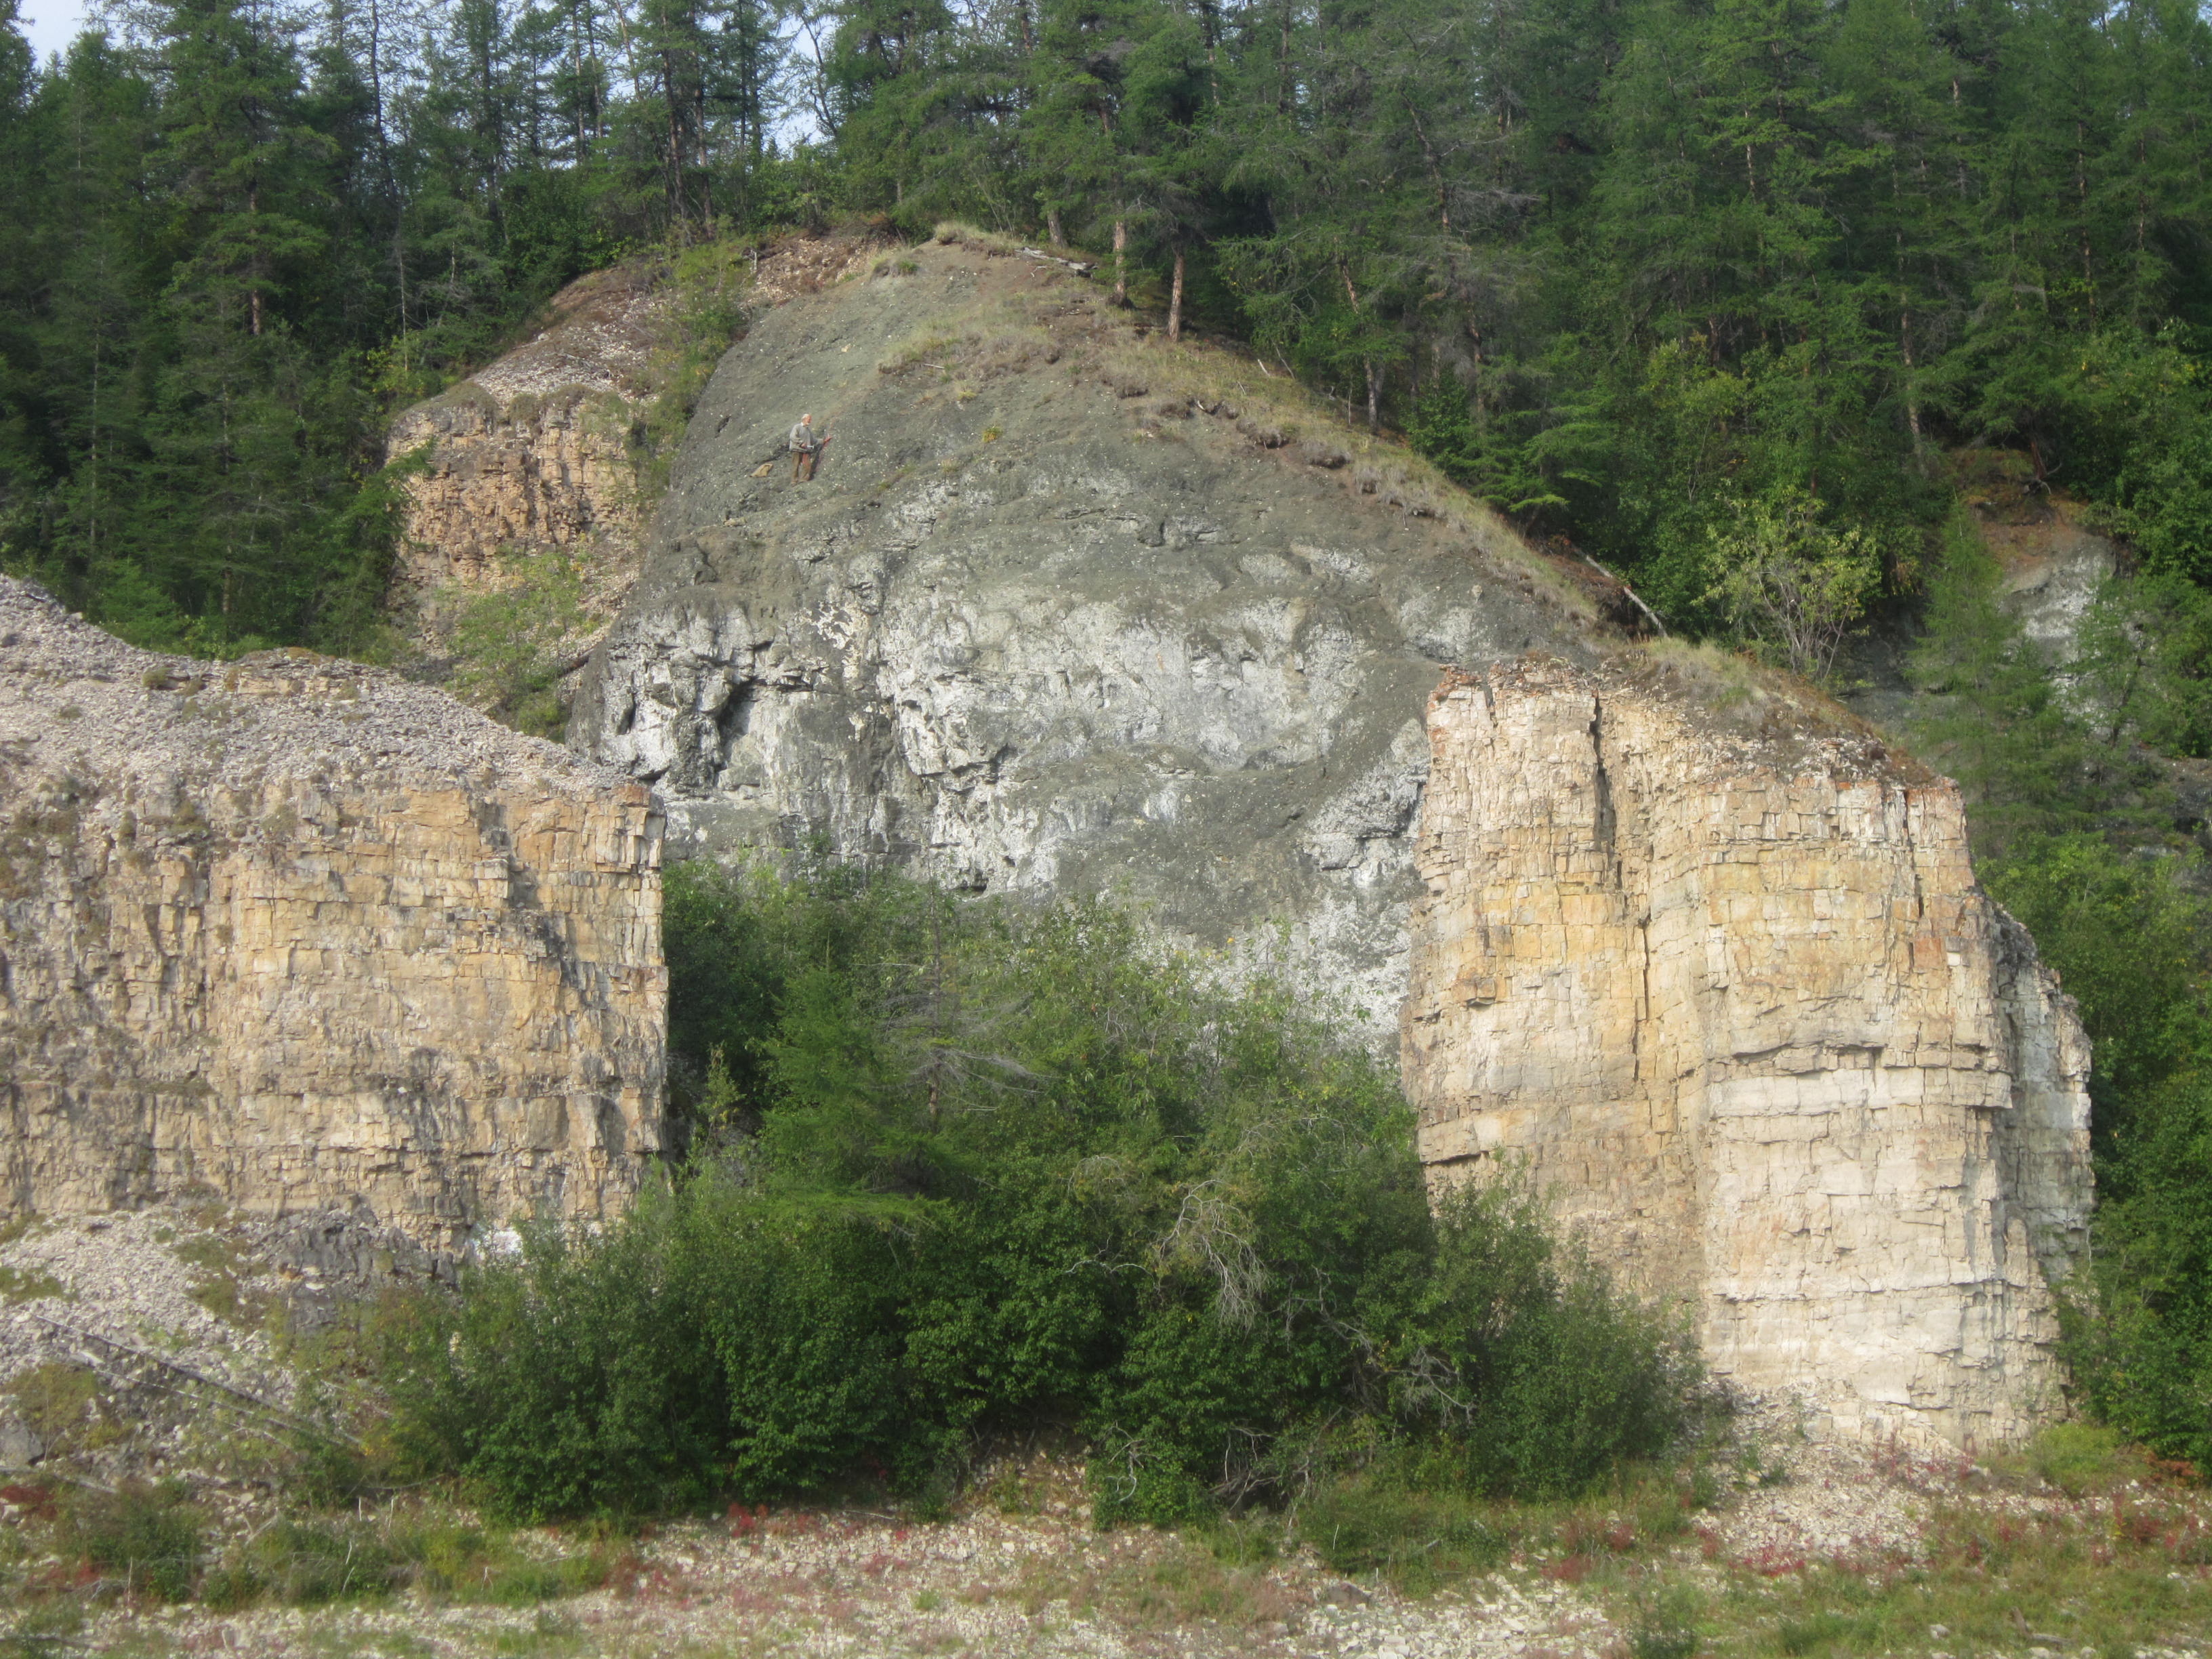

Supplement: s1 [file s1 › pipe Obnazhennaya.JPG]
